# Supplementary material for: Assessment and Distribution of Runs of Homozygosity in Horse Breeds Representing Different Utility Types
Source: MDPI journal article supplement (doi:10.3390/ani12233293), 2022-11-25
Supplement: s1 [file s1]

Supplementary Table S2.

A. Statistical differences regarding ROH number (for all ROH) in respect to horse breed.

|       | KP | HC                     | AR                  | MLP                   | SOK                    | SZTUM                  |
|-------|----|------------------------|---------------------|-----------------------|------------------------|------------------------|
| KP    | -  | W : 4937<br>P : 0.0764 | W : 40<br>P <0.0001 | W : 402<br>P <0.0001  | W : 2124<br>P <0.0001  | W : 1361<br>P <0.0001  |
| HC    |    | -                      | W : 2<br>P <0.0001  | W : 403<br>P <0.0001  | W : 2812<br>P <0.0001  | W : 1843<br>P <0.0001  |
| AR    |    |                        | -                   | W : 5273<br>P <0.0001 | W : 13200<br>P <0.0001 | W : 8538<br>P <0.0001  |
| MLP   |    |                        |                     | -                     | W : 5000<br>P <0.0001  | W : 3284<br>P <0.0001  |
| SOK   |    |                        |                     |                       | -                      | W : 3813<br>P : 0.7123 |
| SZTUM |    |                        |                     |                       |                        | -                      |

B. Statistical differences regarding ROH number for ROH above 4 Mb in respect to horse breed.

|       | KP | HC                     | AR                     | MLP                    | SOK                    | SZTUM                  |
|-------|----|------------------------|------------------------|------------------------|------------------------|------------------------|
| KP    | -  | W : 5943<br>P : 0.6577 | W : 4787<br>P : 0.0047 | W : 3023<br>P : 0.3489 | W : 8595<br>P <0.0001  | W : 5840<br>P <0.0001  |
| HC    |    | -                      | W : 5229<br>P : 0.0003 | W : 3402<br>P : 0.6152 | W : 9955<br>P <0.0001  | W : 6758<br>P <0.0001  |
| AR    |    |                        | -                      | W : 4439<br>P : 0.0028 | W : 11798<br>P <0.0001 | W : 7847<br>P <0.0001  |
| MLP   |    |                        |                        | -                      | W : 4405<br>P <0.0001  | W : 3061<br>P <0.0001  |
| SOK   |    |                        |                        |                        | -                      | W : 4484<br>P : 0.0158 |
| SZTUM |    |                        |                        |                        |                        | -                      |

W- linear rank sum

P- pvalue of the test
