# Supplementary material for: Assessment and Distribution of Runs of Homozygosity in Horse Breeds Representing Different Utility Types
Source: MDPI journal article supplement (doi:10.3390/ani12233293), 2022-11-25
Supplement: s1 [file s1]

Supplement Table S7. Regions of no ROH detected in the analyzed breeds

| Breed | CHR | Start     | Stop      | Length (Mb) | Number of SNPs |
|-------|-----|-----------|-----------|-------------|----------------|
| KP    | 3   | 98676818  | 101079941 | 2.403       | 29             |
|       | 7   | 45673943  | 49023352  | 3.349       | 16             |
| HC    | 1   | 88951573  | 94760030  | 5.808       | 74             |
|       | 7   | 45673943  | 46860621  | 1.187       | 7              |
|       | 7   | 47962591  | 49023352  | 1.061       | 9              |
|       | 13  | 24451306  | 24607012  | 0.156       | 5              |
|       | 16  | 3391246   | 7325274   | 3.934       | 72             |
| AR    | 6   | 84728043  | 85871501  | 1.143       | 21             |
|       | 7   | 45565125  | 46860621  | 1.295       | 8              |
|       | 7   | 47962591  | 49023352  | 1.061       | 9              |
|       | 12  | 13845914  | 16046982  | 2.201       | 26             |
|       | 13  | 29052395  | 29606166  | 0.554       | 14             |
|       | 29  | 1110269   | 3288100   | 2.178       | 25             |
| MLP   | 1   | 31815839  | 33792526  | 1.976       | 54             |
|       | 1   | 44679301  | 46543554  | 1.864       | 32             |
|       | 1   | 47053485  | 55484817  | 8.431       | 149            |
|       | 1   | 65217852  | 66862525  | 1.644       | 49             |
|       | 1   | 73692254  | 74271323  | 0.579       | 9              |
|       | 1   | 83519792  | 92098236  | 8.578       | 119            |
|       | 2   | 10649226  | 12224996  | 1.575       | 37             |
|       | 2   | 17471853  | 19231826  | 1.759       | 48             |
|       | 2   | 35221301  | 36737662  | 1.516       | 41             |
|       | 3   | 116670    | 2810638   | 2.693       | 66             |
|       | 3   | 91209656  | 96398334  | 5.188       | 69             |
|       | 3   | 115832872 | 116850288 | 1.017       | 30             |
|       | 6   | 45213355  | 47653561  | 2.440       | 61             |
|       | 7   | 76937713  | 79117880  | 2.180       | 58             |
|       | 8   | 20460668  | 23126728  | 2.666       | 70             |
|       | 8   | 70257029  | 71192972  | 0.935       | 29             |
|       | 9   | 64992466  | 66395281  | 1.402       | 35             |
|       | 12  | 13419192  | 16046982  | 2.627       | 37             |
|       | 13  | 20774408  | 29752054  | 8.977       | 179            |
|       | 14  | 6064869   | 6988997   | 0.924       | 26             |
|       | 15  | 43188539  | 44510126  | 1.321       | 34             |
|       | 15  | 86041135  | 92835963  | 6.794       | 120            |
|       | 16  | 5203564   | 5970026   | 0.766       | 13             |
|       | 16  | 8751024   | 10834342  | 2.083       | 34             |
|       | 19  | 29605     | 1520206   | 1.490       | 32             |
|       | 23  | 37336369  | 38128750  | 0.792       | 21             |
|       | 26  | 29339592  | 30036230  | 0.696       | 22             |
|       | 28  | 41496813  | 41977080  | 0.480       | 14             |
|       | 29  | 1110269   | 5027361   | 3.917       | 61             |
|       | 29  | 32427227  | 34735896  | 2.308       | 66             |
|       | 30  | 17584029  | 21340121  | 3.756       | 98             |
|       | 31  | 16241953  | 24906381  | 8.664       | 188            |
| SOK   | 1   | 85849355  | 96749241  | 10.899      | 145            |
|       | 3   | 96709111  | 99223755  | 2.514       | 37             |
|       | 3   | 99745444  | 103191969 | 3.446       | 53             |
|       | 6   | 85631025  | 85871501  | 0.240       | 6              |

|       |    |           |           |          |     |
|-------|----|-----------|-----------|----------|-----|
|       | 7  | 45673943  | 49023352  | 3.349    | 16  |
|       | 9  | 53510     | 4029650   | 3.976    | 94  |
|       | 9  | 24731688  | 26134397  | 1.402    | 40  |
|       | 11 | 7154417   | 10249710  | 3.095    | 83  |
|       | 15 | 85145230  | 87440663  | 2.295    | 30  |
|       | 19 | 45792372  | 47310479  | 1.518    | 49  |
|       | 23 | 52379251  | 52477336  | 0.098085 | 5   |
|       | 26 | 27219932  | 31862561  | 4.642629 | 92  |
|       | 29 | 1110269   | 4683840   | 3.573571 | 48  |
|       | 30 | 14971894  | 17823866  | 2.851972 | 78  |
|       | 31 | 102326    | 2823694   | 2.721368 | 77  |
| SZTUM | 1  | 2734928   | 3949461   | 1.214533 | 31  |
|       | 1  | 25333814  | 27703122  | 2.369308 | 74  |
|       | 1  | 40938716  | 41656526  | 0.71781  | 20  |
|       | 1  | 44300989  | 59629393  | 15.3284  | 276 |
|       | 1  | 75180142  | 101430570 | 26.25043 | 241 |
|       | 2  | 5172151   | 6682795   | 1.510644 | 35  |
|       | 2  | 110182872 | 112345392 | 2.16252  | 59  |
|       | 3  | 89113594  | 104576584 | 15.46299 | 209 |
|       | 4  | 18385118  | 20745865  | 2.360747 | 59  |
|       | 4  | 42463698  | 43399927  | 0.936229 | 17  |
|       | 5  | 73509948  | 75203575  | 1.693627 | 37  |
|       | 5  | 78062436  | 78691892  | 0.629456 | 13  |
|       | 6  | 6473778   | 7000935   | 0.527157 | 21  |
|       | 6  | 33966863  | 34146428  | 0.179565 | 7   |
|       | 7  | 45673943  | 49023352  | 3.349409 | 16  |
|       | 8  | 1397315   | 3811325   | 2.41401  | 39  |
|       | 8  | 4421459   | 6689480   | 2.268021 | 46  |
|       | 8  | 19845807  | 20158266  | 0.312459 | 7   |
|       | 8  | 74008845  | 75577532  | 1.568687 | 40  |
|       | 9  | 20747019  | 23119512  | 2.372493 | 61  |
|       | 10 | 64571101  | 66054929  | 1.483828 | 29  |
|       | 10 | 68252111  | 68674224  | 0.422113 | 11  |
|       | 10 | 75152109  | 79022148  | 3.870039 | 88  |
|       | 11 | 2518996   | 3073081   | 0.554085 | 17  |
|       | 11 | 9628365   | 10077744  | 0.449379 | 11  |
|       | 11 | 44820354  | 45130619  | 0.310265 | 13  |
|       | 11 | 55512127  | 57246218  | 1.734091 | 46  |
|       | 12 | 12907785  | 16046982  | 3.139197 | 44  |
|       | 13 | 32110     | 408167    | 0.376057 | 7   |
|       | 13 | 11070524  | 12070381  | 0.999857 | 34  |
|       | 13 | 19886658  | 28655294  | 8.768636 | 179 |
|       | 14 | 5550688   | 6209813   | 0.659125 | 20  |
|       | 15 | 6115524   | 6971084   | 0.85556  | 11  |
|       | 15 | 78573644  | 79004432  | 0.430788 | 11  |
|       | 16 | 19702312  | 22880960  | 3.178648 | 29  |
|       | 18 | 71416     | 600679    | 0.529263 | 16  |
|       | 18 | 3138457   | 3605878   | 0.467421 | 10  |
|       | 18 | 28568011  | 29232491  | 0.66448  | 19  |
|       | 18 | 33557443  | 43596515  | 9.96093  | 41  |
|       | 19 | 33271596  | 33596515  | 0.324919 | 11  |
|       | 20 | 48938506  | 49186160  | 0.247654 | 12  |
|       | 20 | 61196155  | 61801258  | 0.605103 | 18  |

|  |    |          |          |          |    |
|--|----|----------|----------|----------|----|
|  | 21 | 33750764 | 34514375 | 0.763611 | 21 |
|  | 22 | 9814     | 2544840  | 2.535026 | 72 |
|  | 22 | 28787161 | 31262159 | 2.474998 | 70 |
|  | 22 | 40381355 | 40697361 | 0.316006 | 7  |
|  | 23 | 44762900 | 47082200 | 2.3193   | 66 |
|  | 24 | 38330520 | 39955402 | 1.624882 | 41 |
|  | 25 | 16233243 | 16496247 | 0.263004 | 10 |
|  | 26 | 9593864  | 12548030 | 2.954166 | 51 |
|  | 26 | 16991244 | 18028008 | 1.036764 | 23 |
|  | 26 | 26271020 | 29435717 | 3.164697 | 54 |
|  | 27 | 320414   | 820529   | 0.500115 | 7  |
|  | 29 | 1110269  | 4971981  | 3.861712 | 57 |
|  | 29 | 23912377 | 24817095 | 0.904718 | 20 |
|  | 31 | 1956892  | 5443516  | 3.486624 | 90 |
|  | 31 | 9466964  | 10424808 | 0.957844 | 24 |
