# Supplementary material for: Assessment and Distribution of Runs of Homozygosity in Horse Breeds Representing Different Utility Types
Source: MDPI journal article supplement (doi:10.3390/ani12233293), 2022-11-25
Supplement: s1 [file s1]

Supplementary Table S5. ROH hotspots detected in the analyzed breeds

| Breed | CHR | Start       | Stop        | Length (Mb) | Number of SNPs |
|-------|-----|-------------|-------------|-------------|----------------|
| KP    | 1   | 5,040,886   | 5,445,204   | 0.404       | 17             |
|       | 1   | 8,315,402   | 8,967,968   | 0.653       | 20             |
|       | 2   | 27,572,525  | 29,081,977  | 1.509       | 41             |
|       | 4   | 21,973,202  | 23,700,482  | 1.727       | 46             |
|       | 9   | 35,306,553  | 36,838,154  | 1.532       | 48             |
|       | 9   | 45,958,978  | 47,434,669  | 1.476       | 42             |
|       | 10  | 57,525,808  | 59,874,862  | 2.349       | 47             |
|       | 10  | 61,112,691  | 61,405,011  | 0.292       | 8              |
|       | 10  | 62,620,151  | 66,248,521  | 3.628       | 91             |
|       | 10  | 67,110,137  | 67,451,792  | 0.342       | 10             |
|       | 11  | 24,279,941  | 32,013,448  | 7.734       | 198            |
|       | 16  | 87,269,741  | 88,069,785  | 0.800       | 25             |
|       | 20  | 42,762,110  | 43,535,049  | 0.773       | 19             |
|       | 27  | 8,512,990   | 11,588,744  | 3.0758      | 82             |
| HC    | 5   | 46,179,705  | 47,148,310  | 0.969       | 29             |
|       | 6   | 57,096,231  | 62,575,843  | 5.479       | 142            |
|       | 6   | 63,532,034  | 65,049,128  | 1.517       | 43             |
|       | 7   | 50,112,758  | 51,710,979  | 1.598       | 36             |
|       | 9   | 32,537,122  | 33,058,456  | 0.521       | 10             |
|       | 9   | 35,172,519  | 36,838,154  | 1.666       | 41             |
|       | 10  | 26,437,111  | 29,067,063  | 2.629       | 60             |
|       | 11  | 8,647,652   | 8,925,639   | 0.278       | 7              |
|       | 14  | 33,986,115  | 35,708,852  | 1.723       | 49             |
|       | 24  | 370,034     | 3,269,944   | 2.899       | 68             |
|       | 24  | 12,311,336  | 13,795,884  | 1.485       | 7              |
|       | 25  | 30,710,237  | 35,441,033  | 4.731       | 113            |
| AR    | 2   | 43,053,164  | 44,813,488  | 1.760       | 53             |
|       | 2   | 100,357,472 | 102,320,578 | 1.963       | 116            |
|       | 7   | 51,342,600  | 54,419,009  | 3.076       | 65             |
|       | 8   | 36,282,328  | 36,595,207  | 0.313       | 10             |
|       | 9   | 45,385,652  | 47,396,450  | 2.011       | 54             |

|              |    |             |             |       |     |
|--------------|----|-------------|-------------|-------|-----|
|              | 9  | 49,471,705  | 50,315,411  | 0.844 | 23  |
|              | 11 | 22,131,902  | 22,472,610  | 0.341 | 10  |
|              | 11 | 25,233,252  | 31,434,860  | 6.202 | 175 |
|              | 11 | 31,956,077  | 33,792,266  | 1.836 | 61  |
|              | 15 | 56,152,443  | 56,420,784  | 0.268 | 7   |
|              | 15 | 77,908,479  | 80,249,933  | 2.341 | 57  |
|              | 23 | 27,990,315  | 28,153,628  | 0.163 | 4   |
| <b>MLP</b>   | 1  | 121,839,949 | 123,229,881 | 1.389 | 29  |
|              | 1  | 176,071,336 | 178,331,664 | 2.260 | 57  |
|              | 4  | 20,349,108  | 21,066,804  | 0.718 | 21  |
|              | 4  | 21,973,373  | 27,521,898  | 5.549 | 133 |
|              | 4  | 28,688,509  | 29,351,095  | 0.663 | 28  |
|              | 5  | 49,104,624  | 49,713,098  | 0.608 | 20  |
|              | 5  | 50,570,292  | 51,571,722  | 1.001 | 26  |
|              | 5  | 52,130,295  | 53,025,154  | 0.895 | 23  |
|              | 7  | 40,039,177  | 43,905,056  | 3.866 | 86  |
|              | 7  | 51,770,649  | 54,253,799  | 2.483 | 52  |
|              | 8  | 24,633,706  | 26,072,376  | 1.439 | 41  |
|              | 11 | 25,724,472  | 29,829,190  | 4.105 | 115 |
|              | 16 | 35,601,403  | 36,816,206  | 1.215 | 36  |
|              | 17 | 74165930    | 74,910,629  | 0.745 | 21  |
| <b>SOK</b>   | 3  | 106,138,107 | 108,098,923 | 1.961 | 51  |
|              | 5  | 44,816,748  | 49,922,915  | 5.106 | 116 |
|              | 6  | 29,454,070  | 31,320,967  | 1.867 | 48  |
|              | 9  | 35,264,625  | 35,551,277  | 0.287 | 10  |
|              | 10 | 23,934,045  | 30,578,626  | 6.645 | 180 |
|              | 11 | 22,842,852  | 24,867,196  | 2.024 | 55  |
|              | 11 | 27,019,831  | 32,013,448  | 4.994 | 135 |
| <b>SZTUM</b> | 3  | 105,890,193 | 108,201,068 | 2.311 | 57  |
|              | 6  | 29,387,236  | 31,305,190  | 1.918 | 48  |
|              | 10 | 23,514,304  | 30,578,626  | 7.064 | 190 |
|              | 11 | 22,986,900  | 31,434,860  | 8.448 | 233 |
|              | 11 | 31,956,077  | 32,309,605  | 0.354 | 18  |

|  |    |            |            |       |    |
|--|----|------------|------------|-------|----|
|  | 11 | 32,739,985 | 33,253,535 | 0.513 | 36 |
|  | 11 | 33,670,635 | 34,049,633 | 0.379 | 28 |
|  | 11 | 34,523,642 | 35,078,510 | 0.555 | 15 |
