# Supplementary material for: Assessment and Distribution of Runs of Homozygosity in Horse Breeds Representing Different Utility Types
Source: MDPI journal article supplement (doi:10.3390/ani12233293), 2022-11-25
Supplement: s1 [file s1]

Supplementary Material Table S4.  $F_{ROH}$  for the analysed breeds

| Breed | $F_{ROH}$   | ROH length category (Mb) |              |              |              |              |
|-------|-------------|--------------------------|--------------|--------------|--------------|--------------|
|       |             | 1+                       | 2+           | 4+           | 8+           | 16+          |
| KP    | <b>Mean</b> | <b>0.088</b>             | <b>0.084</b> | <b>0.081</b> | <b>0.063</b> | <b>0.035</b> |
|       | SD          | 0.041                    | 0.041        | 0.040        | 0.038        | 0.031        |
|       | Min         | 0.021                    | 0.019        | 0.013        | 0.000        | 0.000        |
|       | Max         | 0.282                    | 0.281        | 0.273        | 0.247        | 0.187        |
| HC    | <b>Mean</b> | <b>0.084</b>             | <b>0.082</b> | <b>0.071</b> | <b>0.053</b> | <b>0.028</b> |
|       | SD          | 0.028                    | 0.028        | 0.027        | 0.026        | 0.020        |
|       | Min         | 0.014                    | 0.013        | 0.005        | 0.000        | 0.000        |
|       | Max         | 0.148                    | 0.144        | 0.134        | 0.110        | 0.084        |
| AR    | <b>Mean</b> | <b>0.110</b>             | <b>0.101</b> | <b>0.067</b> | <b>0.040</b> | <b>0.026</b> |
|       | SD          | 0.023                    | 0.023        | 0.023        | 0.020        | 0.019        |
|       | Min         | 0.060                    | 0.049        | 0.017        | 0.003        | 0.008        |
|       | Max         | 0.184                    | 0.177        | 0.144        | 0.125        | 0.047        |
| MLP   | <b>Mean</b> | <b>0.089</b>             | <b>0.079</b> | <b>0.051</b> | <b>0.027</b> | <b>0.009</b> |
|       | SD          | 0.028                    | 0.027        | 0.022        | 0.046        | 0.009        |
|       | Min         | 0.028                    | 0.025        | 0.016        | 0.000        | 0.000        |
|       | Max         | 0.143                    | 0.138        | 0.099        | 0.071        | 0.041        |
| SOK   | <b>Mean</b> | <b>0.063</b>             | <b>0.059</b> | <b>0.039</b> | <b>0.022</b> | <b>0.009</b> |
|       | SD          | 0.017                    | 0.017        | 0.015        | 0.014        | 0.010        |
|       | Min         | 0.026                    | 0.024        | 0.010        | 0.000        | 0.000        |
|       | Max         | 0.123                    | 0.119        | 0.089        | 0.061        | 0.041        |
| SZTUM | <b>Mean</b> | <b>0.058</b>             | <b>0.053</b> | <b>0.033</b> | <b>0.018</b> | <b>0.007</b> |
|       | SD          | 0.019                    | 0.019        | 0.019        | 0.017        | 0.012        |
|       | Min         | 0.028                    | 0.025        | 0.009        | 0.000        | 0.000        |
|       | Max         | 0.149                    | 0.145        | 0.130        | 0.112        | 0.082        |
