# Supplementary material for: Assessment and Distribution of Runs of Homozygosity in Horse Breeds Representing Different Utility Types
Source: MDPI journal article supplement (doi:10.3390/ani12233293), 2022-11-25
Supplement: s1 [file s1]

Supplementary Table S1. Number and sum of lengths of ROH in the analysed breeds

| Breed |                    | Stat        | ROH length category (Mb) |              |              |              |             |
|-------|--------------------|-------------|--------------------------|--------------|--------------|--------------|-------------|
|       |                    |             | 1+                       | 2+           | 4+           | 8+           | 16+         |
| KP    | Number/animal      | <b>Mean</b> | <b>27.6</b>              | <b>24.7</b>  | <b>17.3</b>  | <b>9.6</b>   | <b>3.4</b>  |
|       |                    | SD          | 7.6                      | 7.4          | 6.2          | 4.6          | 2.5         |
|       |                    | Min         | 12                       | 10           | 5            | 0            | 0           |
|       |                    | Max         | 50                       | 48           | 41           | 30           | 16          |
|       | Length/animal (Mb) | <b>Mean</b> | <b>229.6</b>             | <b>224.5</b> | <b>203.2</b> | <b>158.6</b> | <b>87.8</b> |
|       |                    | SD          | 103.1                    | 103.0        | 100.8        | 95.6         | 76.7        |
|       |                    | Min         | 52.5                     | 47.2         | 33.1         | 0            | 0           |
|       |                    | Max         | 707.4                    | 703.8        | 684.5        | 618.8        | 468.2       |
| HC    | Number/animal      | <b>Mean</b> | <b>28.5</b>              | <b>25.7</b>  | <b>16.4</b>  | <b>8.5</b>   | <b>2.9</b>  |
|       |                    | SD          | 6.6                      | 6.0          | 5.1          | 3.7          | 2.0         |
|       |                    | Min         | 10                       | 8            | 2            | 0            | 0           |
|       |                    | Max         | 44                       | 40           | 29           | 19           | 9           |
|       | Length/animal (Mb) | <b>Mean</b> | <b>210.2</b>             | <b>205.1</b> | <b>178.8</b> | <b>133.1</b> | <b>70.7</b> |
|       |                    | SD          | 70.4                     | 70.0         | 68.3         | 64.0         | 49.1        |
|       |                    | Min         | 36.2                     | 32.3         | 13.1         | 0            | 0           |
|       |                    | Max         | 369.7                    | 360.4        | 336.1        | 275.3        | 211.1       |
| AR    | Number/animal      | <b>Mean</b> | <b>59.5</b>              | <b>49.9</b>  | <b>19.0</b>  | <b>6.7</b>   | <b>2.0</b>  |
|       |                    | SD          | 6.9                      | 6.8          | 5.2          | 3.1          | 1.6         |
|       |                    | Min         | 42                       | 32           | 7            | 1            | 0           |
|       |                    | Max         | 74                       | 64           | 32           | 17           | 9           |
|       | Length/animal (Mb) | <b>Mean</b> | <b>271.1</b>             | <b>253.9</b> | <b>168.7</b> | <b>100.5</b> | <b>48.7</b> |
|       |                    | SD          | 57.1                     | 57.4         | 57.4         | 51.3         | 38.9        |
|       |                    | Min         | 149.3                    | 122.1        | 42.9         | 8.4          | 0           |
|       |                    | Max         | 460.1                    | 443.5        | 360.8        | 313.1        | 218.2       |
| MLP   | Number/animal      | <b>Mean</b> | <b>48.9</b>              | <b>41.8</b>  | <b>18.0</b>  | <b>5.1</b>   | <b>1.0</b>  |
|       |                    | SD          | 13.2                     | 11.6         | 6.1          | 3.1          | 1.0         |
|       |                    | Min         | 20                       | 16           | 7            | 0            | 0           |
|       |                    | Max         | 84                       | 73           | 29           | 13           | 5           |
|       | Length/animal (Mb) | <b>Mean</b> | <b>211.6</b>             | <b>198.9</b> | <b>127.5</b> | <b>67.5</b>  | <b>22.2</b> |
|       |                    | SD          | 69.3                     | 67.0         | 54.1         | 41.2         | 23.4        |
|       |                    | Min         | 71.1                     | 63.8         | 39.8         | 0            | 0           |
|       |                    | Max         | 357.9                    | 345.2        | 248.1        | 177.4        | 101.8       |
| SOK   | Number/animal      | <b>Mean</b> | <b>35.4</b>              | <b>30.0</b>  | <b>11.4</b>  | <b>4.0</b>   | <b>1</b>    |
|       |                    | SD          | 6.4                      | 5.8          | 3.5          | 2.1          | 1           |
|       |                    | Min         | 19                       | 17           | 4            | 0            | 0           |
|       |                    | Max         | 55                       | 49           | 25           | 10           | 4           |
|       | Length/animal (Mb) | <b>Mean</b> | <b>157.3</b>             | <b>147.4</b> | <b>96.5</b>  | <b>56.0</b>  | <b>24.4</b> |
|       |                    | SD          | 41.6                     | 41.4         | 38.3         | 34.5         | 25.0        |
|       |                    | Min         | 64.1                     | 60.4         | 25.6         | 0            | 0           |
|       |                    | Max         | 308.1                    | 297.2        | 221.7        | 152.1        | 102.1       |
| SZTUM | Number/animal      | <b>Mean</b> | <b>35.0</b>              | <b>28.9</b>  | <b>10.2</b>  | <b>3.2</b>   | <b>0.8</b>  |
|       |                    | SD          | 5.8                      | 5.3          | 3.8          | 2.6          | 1.2         |
|       |                    | Min         | 18                       | 15           | 3            | 0            | 0           |
|       |                    | Max         | 49                       | 44           | 23           | 14           | 7           |
|       | Length/animal (Mb) | <b>Mean</b> | <b>145.0</b>             | <b>134.2</b> | <b>82.7</b>  | <b>44.6</b>  | <b>17.7</b> |
|       |                    | SD          | 47.8                     | 47.4         | 47.7         | 42.9         | 31.0        |
|       |                    | Min         | 70.6                     | 62.9         | 23.3         | 0            | 0           |
|       |                    | Max         | 372.8                    | 362.6        | 326.2        | 280.6        | 204.3       |
