# Supplementary material for: Assessment and Distribution of Runs of Homozygosity in Horse Breeds Representing Different Utility Types
Source: Animals (Basel). 2022 Nov 25;12(23):3293. doi: 10.3390/ani12233293 (PMC9736150; doi:10.3390/ani12233293)
Supplement: Supplementary file 1 [file animals-12-03293-s001.zip › Supplementary Table S6.xlsx]

## Sheet: Gene observed in ROH patterns
KP	HC	AR	MLP	SOK	SZTUM
FAM53B	AURKC	TNS4	ADPGK	CDC42EP5	PRPF31
NKX1-2	ZNF543	TOP2A	PARP6	LENG9	CNOT3
OAT	eca-mir-9089-1	ABI3	PKM	ILT11B	TSEN34
CRYBG1	ZNF304	NGFR	GRAMD2A	KIR3DL	RPS9
QRSL1	ZNF773	NXPH3	MYO9A	NCR1	CDC42EP5
MTRES1	ZNF134	KAT7	TTC6	EPS8L1	LENG9
SOBP	ZNF551	DLX4	SSTR1	BRSK1	ILT11B
U6	ZNF671	ITGA3	GEMIN2	KMT5C	KIR3DL
NR2E1	eca-mir-9093	PDK2	PNN	TMEM190	NCR1
AFG1L	ZNF135	TMEM92	DLX4	RPL28	EPS8L1
FOXO3	ZNF544	XYLT2	ITGA3	ZNF628	BRSK1
ARMC2	ZNF8	EME1	PDK2	NAT14	KMT5C
MARCKS	ZSCAN22	ACSF2	TMEM92	SSC5D	TMEM190
NT5DC1	RPS5	RSAD1	XYLT2	ZNF524	RPL28
DSE	RNF225	MYCBPAP	EME1	ZNF865	ZNF628
U1	ZNF584	EPN3	ACSF2	ZNF580	NAT14
CALHM5	ZNF324	SPATA20	RSAD1	ZNF581	SSC5D
CALHM4	ZNF446	CACNA1G	MYCBPAP	CCDC106	ZNF524
RWDD1	TRIM28	ABCC3	EPN3	U2AF2	ZNF865
DCBLD1	DDX43	LUC7L3	SPATA20	EPN1	ZNF580
NUS1	MTO1	WFIKKN2	CACNA1G	EQUCABV1R903	ZNF581
SLC35F1	U6	NME1	ABCC3	NLRP4	CCDC106
SNX11	CD109	UTP18	LUC7L3	NLRP5	U2AF2
CALCOCO2	SLC39A11	KIF2B	WFIKKN2	ZNF444	EPN1
ATP5MC1	SPRY4	TOM1L1	NME1	GALP	EQUCABV1R903
UBE2Z	GNPDA1	STXBP4	UTP18	EDDM13	NLRP4
IGF2BP1	PCDH12	HLF	KIF2B	ZNF667	NLRP5
B4GALNT2	PCDH1	PCTP	VSTM2A	ZNF582	ZNF444
ABI3	ARAP3	ANKFN1	EGFR	ZNF471	GALP
NGFR	FCHSD1	NOG	LANCL2	ZFP28	EDDM13
NXPH3	HDAC3	MSI2	U6	ZNF470	ZNF667
KAT7	DIAPH1	OR4D1	NHLH2	ZNF71	ZNF582
DLX4	HARS1	OR4D2	CASQ2	AURKC	ZNF471
ITGA3	NDUFA2	EPX	CSDE1	ZNF543	ZFP28
PDK2	CD14	LPO	NRAS	eca-mir-9089-1	ZNF470
TMEM92	APBB3	RAD51C	AMPD1	ZNF304	ZNF71
XYLT2	GPR137C	PPM1E	DENND2C	ZNF773	AURKC
EME1	PSMC6	PRR11	BCAS2	ZNF134	ZNF543
ACSF2	STYX	SMG8	TRIM33	ZNF551	eca-mir-9089-1
RSAD1	CDKN3	GDPD1	SYT6	ZNF671	ZNF304
MYCBPAP	CGRRF1	YPEL2	AP4B1	eca-mir-9093	ZNF773
EPN3	SAMD4A	THADA	PTPN22	ZNF135	ZNF134
SPATA20	SOCS4	ZFP36L2	RSBN1	ZNF544	ZNF551
CACNA1G	MAPK1IP1L	SMC6	PHTF1	ZNF8	ZNF671
ABCC3	LGALS3	RAD51AP2	SLC16A1	ZSCAN22	eca-mir-9093
LUC7L3	CCDC196	CYRIA	PPM1J	RPS5	ZNF135
WFIKKN2	GPHN	NBAS	ST7L	RNF225	ZNF544
NME1	FAM71D	ERRFI1	KCND3	ZNF584	ZNF8
UTP18	MPP5	TNFRSF9	NTM	ZNF324	ZSCAN22
KIF2B	EIF2S1	UTS2	JAM3	ZNF446	RPS5
TOM1L1	PLEKHH1	U4	ACAD8	TRIM28	RNF225
STXBP4	ARG2	DNAJC11	GLB1L2	DDX43	ZNF584
HLF	MVB12B	KLHL21	FBXL12	MTO1	ZNF324
PCTP	LMX1B	NOL9	ZNF699	U6	ZNF446
ANKFN1	ZBTB43	PLEKHG5	OR1M1	CD109	TRIM28
NOG	ZBTB34	TNFRSF25	SETD1B	NEUROD2	DDX43
DGKE	RALGPS1	HES2	PSMD9	MED1	MTO1
SCPEP1	SLC2A8	ACOT7	CFAP251	FBXL20	U6
AKAP1	ZNF79	GPR153	BCL7A	CACNB1	CD109
MSI2	LRSAM1	ICMT	MLXIP	ARL5C	MED1
ARHGEF26	STXBP1	RPL22	LRRC43	PLXDC1	FBXL20
SNORD22	CFAP157	CHD5	B3GNT4	FBXO47	CACNB1
DNAJC8	TTC16	NPHP4	KNTC1	RPL23	ARL5C
EYA3	CDK9	SCLT1	DENR	C11H17orf98	PLXDC1
RPA2	FPGS	U7	HIP1R	CWC25	FBXO47
IFI6	SLC25A25	PGRMC2	OGFOD2	PIP4K2B	RPL23
FGR	LCN2	MFSD8	ARL6IP4	PCGF2	C11H17orf98
AHDC1	C9orf16	CDC37	C8H12orf65	EPOP	CWC25
WASF2	DNM1	TYK2	KMT5A	SRCIN1	PIP4K2B
eca-mir-9065	SWI5	ICAM3	SNRNP35	GPR179	PCGF2
CD164L2	COQ4	S1PR2	TMED2	NPEPPS	EPOP
FCN3	SLC27A4	DNMT1	DDX55	KPNB1	SRCIN1
MAP3K6	URM1	EIF3G	GTF2H3	TBKBP1	GPR179
SLC9A1	CERCAM	ANGPTL6	TCTN2	TBX21	NPEPPS
TENT5B	ODF2	COL5A3	ATP6V0A2	LRRC46	KPNB1
KDF1	GLE1	OLFM2	DNAH10	SP2	TBKBP1
NR0B2	SPTAN1	FBXL12		PNPO	TBX21
GPATCH3	SET	ZNF699		CDK5RAP3	LRRC46
GPN2	PKN3	U6		NFE2L1	SP2
BICRAL	TBC1D13	OR1M1		SNX11	PNPO
RPL7L1	ENDOG	PTPRM		KIF2B	CDK5RAP3
CNPY3	LRRC8A	MTDH		TOM1L1	NFE2L1
GNMT	PHYHD1	LAPTM4B		STXBP4	SNX11
PPP2R5D	NUP188	MATN2		HLF	CALCOCO2
KLHDC3	MIGA2	POP1		PCTP	ATP5MC1
RRP36	DOLPP1	KCNS2		ANKFN1	UBE2Z
KLC4	PTPA	OSR2		NOG	IGF2BP1
PTK7	NTMT1	VPS13B		DGKE	B4GALNT2
SRF	PRRX2	ODF1		SCPEP1	ABI3
eca-mir-8912	TOR1B	ATP6V1C1		AKAP1	NGFR
CUL9	USP20			MSI2	NXPH3
TTBK1	GPR107			LCORL	KAT7
SLC22A7	NCS1			DCAF16	DLX4
ABCC10	HMCN2			FAM184B	ITGA3
TJAP1	ASS1			QDPR	PDK2
POLR1C	FUBP3			GJA5	TMEM92
POLH	PRDM12			ACP6	XYLT2
MAD2L1BP	EXOSC2			FMO5	EME1
RSPH9	ABL1			PRKAB2	ACSF2
DUSP26	eca-mir-9039			SEC22B	RSAD1
RNF122	LAMC3			NOTCH2	MYCBPAP
TTI2	AIF1L			HMGCS2	EPN3
FUT10	NUP214			ZNF697	SPATA20
EFCAB1	PLPP7			WARS2	CACNA1G
PRKDC	PRRC2B			TBX15	ABCC3
CEBPD	SNORD62			SPAG17	LUC7L3
POP1	POMT1			GDAP2	WFIKKN2
KCNS2	U2			VTCN1	NME1
OSR2	NTNG2			TRIM45	UTP18
VPS13B	CFAP77			IGSF3	KIF2B
	NOTCH2			CD58	TOM1L1
	HMGCS2			NHLH2	STXBP4
	ZNF697			CASQ2	HLF
	WARS2			DCP1B	PCTP
	TBX15			CACNA2D4	ANKFN1
	RESF1			FBXL14	NOG
	BICD1			RAD52	MSI2
	FGD4			NINJ2	EPX
	DNM1L			KDM5A	LPO
	LRRK2			SNAI2	RAD51C
	CNTN1			EFCAB1	PPM1E
	PDZRN4				GDPD1
	PPHLN1				YPEL2
	TMEM117				DHX40
	ANO6				CLTC
	ARID2				INTS2
	ACP5				BRIP1
	ELOF1				LCORL
	ECSIT				DCAF16
	ZNF653				FAM184B
	ELAVL3				QDPR
	RGL3				DCP1B
	EPOR				CACNA2D4
	TMEM205				FBXL14
	RAB3D				RAD52
	DOCK6				NINJ2
	KANK2				KDM5A
	SPC24
	YIPF2
	TMED1
	AP1M2
	CDKN2D
	KRI1
	S1PR5
	KEAP1
	CDC37
	TYK2
	ICAM3
	S1PR2
	DNMT1
	EIF3G
	ANGPTL6
	COL5A3
	OLFM2
	PXDNL
	SNAI2
	EFCAB1
	PRKDC
	CEBPD

## Sheet: Genes in multiple breeds
Names	total	elements
AR HC KP MLP SOK SZTUM	1	U6
AR KP MLP SOK SZTUM	1	KIF2B
AR KP MLP SZTUM	17	WFIKKN2 EME1 MYCBPAP ABCC3 ITGA3 PDK2 EPN3 UTP18 RSAD1 XYLT2 TMEM92 NME1 SPATA20 CACNA1G DLX4 LUC7L3 ACSF2
AR KP SOK SZTUM	7	NOG PCTP ANKFN1 TOM1L1 MSI2 HLF STXBP4
HC KP SOK	1	EFCAB1
AR KP SZTUM	4	NGFR NXPH3 KAT7 ABI3
KP SOK SZTUM	1	SNX11
HC SOK SZTUM	22	eca-mir-9093 ZNF324 RNF225 ZNF446 RPS5 AURKC ZNF135 eca-mir-9089-1 ZNF671 ZNF773 ZNF134 ZNF8 ZNF551 ZNF544 ZSCAN22 ZNF584 DDX43 TRIM28 MTO1 ZNF543 CD109 ZNF304
HC KP	2	CEBPD PRKDC
AR KP	4	KCNS2 OSR2 POP1 VPS13B
KP SOK	3	DGKE SCPEP1 AKAP1
KP SZTUM	5	UBE2Z ATP5MC1 CALCOCO2 B4GALNT2 IGF2BP1
AR HC	9	ICAM3 COL5A3 S1PR2 DNMT1 TYK2 EIF3G ANGPTL6 CDC37 OLFM2
HC SOK	6	HMGCS2 WARS2 NOTCH2 SNAI2 TBX15 ZNF697
AR MLP	3	FBXL12 OR1M1 ZNF699
AR SZTUM	6	LPO RAD51C PPM1E EPX GDPD1 YPEL2
MLP SOK	2	NHLH2 CASQ2
SOK SZTUM	65	RPL23 ZNF667 SRCIN1 TBX21 ZNF470 EPS8L1 C11H17orf98 LCORL ZNF628 ZFP28 U2AF2 EPOP ZNF580 GPR179 FAM184B FBXL20 BRSK1 ZNF582 RAD52 NPEPPS LRRC46 EDDM13 CCDC106 LENG9 ZNF581 SSC5D TBKBP1 ZNF524 NINJ2 KIR3DL FBXL14 GALP QDPR CACNA2D4 PCGF2 TMEM190 KPNB1 MED1 RPL28 ILT11B ZNF71 NCR1 NLRP5 ZNF865 DCP1B PIP4K2B ZNF444 CDC42EP5 SP2 KDM5A CACNB1 NFE2L1 PLXDC1 DCAF16 EPN1 KMT5C PNPO ARL5C FBXO47 CDK5RAP3 …
KP	64	RNF122 AHDC1 PPP2R5D CUL9 NT5DC1 SLC35F1 RRP36 POLR1C FGR SNORD22 MARCKS ARHGEF26 KLC4 FAM53B NUS1 MAD2L1BP PTK7 DSE FCN3 IFI6 TTBK1 CNPY3 KLHDC3 CD164L2 SLC22A7 KDF1 RPL7L1 QRSL1 SOBP eca-mir-9065 U1 GPN2 DCBLD1 RPA2 RWDD1 GPATCH3 TJAP1 EYA3 ABCC10 FOXO3 GNMT MAP3K6 DNAJC8 eca-mir-8912 CALHM4 SLC9A1 MTRES1 AFG1L RSPH9 TTI2 CALHM5 CRYBG1 FUT10 SRF DUSP26 TENT5B WASF2 NR0B2 ARMC2 BICRAL NR2E1 NKX1…
HC	118	SAMD4A GPHN SLC25A25 CDKN2D SLC2A8 RALGPS1 ARG2 KANK2 ODF2 PPHLN1 GPR107 PCDH12 CFAP77 ZBTB34 NUP214 PCDH1 CDK9 USP20 TBC1D13 RGL3 SLC39A11 AP1M2 NCS1 S1PR5 SET DOLPP1 PKN3 EIF2S1 GPR137C BICD1 ACP5 STXBP1 NUP188 NTMT1 FUBP3 APBB3 FPGS SPRY4 LMX1B SWI5 GLE1 EXOSC2 COQ4 CFAP157 RAB3D LAMC3 CERCAM LCN2 ECSIT DNM1L LGALS3 GNPDA1 PXDNL DNM1 HMCN2 CNTN1 STYX DIAPH1 C9orf16 SOCS4 TMEM117 ASS1 AIF1L ZNF…
AR	38	OR4D1 NBAS HES2 NOL9 MATN2 DNAJC11 SMG8 NPHP4 U4 KLHL21 PTPRM CHD5 GPR153 RPL22 CYRIA RAD51AP2 ODF1 ICMT UTS2 PGRMC2 TNFRSF9 MFSD8 THADA ERRFI1 TOP2A SCLT1 TNS4 PLEKHG5 OR4D2 ACOT7 MTDH PRR11 LAPTM4B TNFRSF25 U7 SMC6 ZFP36L2 ATP6V1C1
MLP	52	LANCL2 PSMD9 AP4B1 ARL6IP4 NTM TRIM33 GLB1L2 KCND3 TTC6 PPM1J DENND2C PKM ACAD8 TCTN2 JAM3 PTPN22 ST7L MYO9A DENR B3GNT4 SYT6 AMPD1 ATP6V0A2 KMT5A BCL7A PARP6 EGFR KNTC1 ADPGK BCAS2 CFAP251 TMED2 CSDE1 C8H12orf65 GTF2H3 OGFOD2 PNN GEMIN2 RSBN1 SLC16A1 GRAMD2A NRAS DNAH10 SETD1B LRRC43 SNRNP35 VSTM2A SSTR1 DDX55 MLXIP HIP1R PHTF1
SOK	12	SPAG17 PRKAB2 TRIM45 IGSF3 GDAP2 NEUROD2 ACP6 SEC22B FMO5 VTCN1 GJA5 CD58
SZTUM	8	BRIP1 PRPF31 CNOT3 RPS9 DHX40 TSEN34 CLTC INTS2

## Sheet: Gene Ontology
Term:	Database	ID	Input number	Background number	P-Value	Corrected P-Value	Input	Hyperlink
nucleus	Gene Ontology	GO:0005634	53	1897	1.90773e-06	0.00139646	PSMD9|FBXL12|TBX21|KMT5C|NR2E1|PRKDC|FOXO3|MED1|NHLH2|APBB3|PTPN22|PPM1E|SET|NR0B2|NFE2L1|DNMT1|RSBN1|PRR11|TBX15|DLX4|MLXIP|EYA3|TOP2A|ZNF304|STYX|SP2|KPNB1|LMX1B|ZNF580|ZNF582|NOL9|ZNF584|HLF|SNAI2|DNAJC8|MTDH|TTBK1|FAM53B|NEUROD2|PRDM12|BRSK1|UBE2Z|GEMIN2|KAT7|PTPA|NKX1-2|RAD52|PPP2R5D|CDK9|HES2|KDM5A|ZNF653|ZBTB43	http://amigo.geneontology.org/amigo/term/GO:0005634
regulation of transcription by RNA polymerase II	Gene Ontology	GO:0006357	17	424	0.000155329	0.0568503	NEUROD2|ZNF653|NFE2L1|ZNF304|NR2E1|ZNF697|ZBTB43|ZNF580|NKX1-2|ZNF584|DLX4|MLXIP|MTDH|ZNF134|ZBTB34|ZSCAN22|NHLH2	http://amigo.geneontology.org/amigo/term/GO:0006357
negative regulation of transcription by RNA polymerase II	Gene Ontology	GO:0000122	11	214	0.000316316	0.0766938	PCGF2|TBX21|NR0B2|ZNF8|FOXO3|MED1|KANK2|TBX15|DLX4|HES2|NR2E1	http://amigo.geneontology.org/amigo/term/GO:0000122
cytoplasm	Gene Ontology	GO:0005737	37	1525	0.00103285	0.111136	PSMD9|GNPDA1|FOXO3|OAT|EIF2S1|KLHDC3|RSAD1|GLE1|PTPN22|LRRK2|NTMT1|CDKN3|S1PR2|NFE2L1|S1PR5|APBB3|MARCKS|MSI2|NPEPPS|PKM|FGD4|STYX|ASS1|QDPR|KPNB1|CDC42EP5|FPGS|TTBK1|TBKBP1|GPHN|BRSK1|GEMIN2|PTPA|PRR11|KANK2|NR0B2|DNM1L	http://amigo.geneontology.org/amigo/term/GO:0005737
protein import into nucleus	Gene Ontology	GO:0006606	4	29	0.00106277	0.111136	NUP188|NUP214|KPNB1|FAM53B	http://amigo.geneontology.org/amigo/term/GO:0006606
clathrin-coated vesicle	Gene Ontology	GO:0030136	3	13	0.00127562	0.116719	AP1M2|HIP1R|GPR107	http://amigo.geneontology.org/amigo/term/GO:0030136
RNA polymerase II transcription regulatory region sequence-specific DNA binding	Gene Ontology	GO:0000977	8	147	0.00144649	0.117648	TBX21|NR2E1|LMX1B|NHLH2|HLF|HES2|ZNF653|TBX15	http://amigo.geneontology.org/amigo/term/GO:0000977
DNA-binding transcription factor activity	Gene Ontology	GO:0003700	9	190	0.00186689	0.124275	ZNF582|NFE2L1|ZNF697|FOXO3|DLX4|NKX1-2|NR2E1|SNAI2|MLXIP	http://amigo.geneontology.org/amigo/term/GO:0003700
	Gene Ontology	GO:0004601	3	16	0.00214061	0.125311	LPO|EPX|PXDNL	http://amigo.geneontology.org/amigo/term/GO:0004601
positive regulation of transcription, DNA-templated	Gene Ontology	GO:0045893	5	63	0.0024894	0.13016	BICRAL|NFE2L1|TRIM45|TRIM28|GPATCH3	http://amigo.geneontology.org/amigo/term/GO:0045893
identical protein binding	Gene Ontology	GO:0042802	3	18	0.00287873	0.136086	OAT|GNPDA1|GNMT	http://amigo.geneontology.org/amigo/term/GO:0042802
nucleoplasm	Gene Ontology	GO:0005654	8	166	0.00297457	0.136086	TRIM28|STYX|CCDC106|ZNF697|ACOT7|TRIM45|ZNF134|ZBTB34	http://amigo.geneontology.org/amigo/term/GO:0005654
promoter-specific chromatin binding	Gene Ontology	GO:1990841	2	5	0.00380532	0.154383	PCGF2|TRIM28	http://amigo.geneontology.org/amigo/term/GO:1990841
negative regulation of extrinsic apoptotic signaling pathway in absence of ligand	Gene Ontology	GO:2001240	2	5	0.00380532	0.154383	IFI6|EYA3	http://amigo.geneontology.org/amigo/term/GO:2001240
mRNA binding	Gene Ontology	GO:0003729	6	107	0.00485975	0.161408	DENR|RPS5|SNRNP35|DCP1B|SAMD4A|LUC7L3	http://amigo.geneontology.org/amigo/term/GO:0003729
90S preribosome	Gene Ontology	GO:0030686	2	6	0.0050276	0.161408	KRI1|RRP36	http://amigo.geneontology.org/amigo/term/GO:0030686
signaling receptor binding	Gene Ontology	GO:0005102	6	108	0.00507157	0.161408	CD58|FGR|ANGPTL6|VTCN1|CNPY3|NXPH3	http://amigo.geneontology.org/amigo/term/GO:0005102
clathrin light chain binding	Gene Ontology	GO:0032051	2	7	0.00640532	0.187548	CLTC|HIP1R	http://amigo.geneontology.org/amigo/term/GO:0032051
clathrin binding	Gene Ontology	GO:0030276	3	26	0.00729099	0.193943	SYT6|TOM1L1|HIP1R	http://amigo.geneontology.org/amigo/term/GO:0030276
nuclear-transcribed mRNA poly(A) tail shortening	Gene Ontology	GO:0000289	2	8	0.00793397	0.193943	SAMD4A|CNOT3	http://amigo.geneontology.org/amigo/term/GO:0000289
positive regulation of interferon-gamma production	Gene Ontology	GO:0032729	2	8	0.00793397	0.193943	PTPN22|CD14	http://amigo.geneontology.org/amigo/term/GO:0032729
RNA export from nucleus	Gene Ontology	GO:0006405	2	8	0.00793397	0.193943	NUP188|NUP214	http://amigo.geneontology.org/amigo/term/GO:0006405
nuclear chromatin	Gene Ontology	GO:0000790	6	121	0.00847838	0.193943	ZNF697|KAT7|RAD51AP2|EME1|KLHDC3|ZSCAN22	http://amigo.geneontology.org/amigo/term/GO:0000790
voltage-gated calcium channel complex	Gene Ontology	GO:0005891	2	9	0.00960916	0.198364	CACNB1|CACNA2D4	http://amigo.geneontology.org/amigo/term/GO:0005891
clathrin coat assembly	Gene Ontology	GO:0048268	2	9	0.00960916	0.198364	CLTC|HIP1R	http://amigo.geneontology.org/amigo/term/GO:0048268
cell cycle arrest	Gene Ontology	GO:0007050	2	9	0.00960916	0.198364	CDKN3|PRR11	http://amigo.geneontology.org/amigo/term/GO:0007050
DNA-binding transcription factor activity, RNA polymerase II-specific	Gene Ontology	GO:0000981	10	297	0.010722	0.209106	NEUROD2|ZNF653|SP2|ZNF304|LMX1B|FOXO3|NKX1-2|ZNF584|ZSCAN22|NHLH2	http://amigo.geneontology.org/amigo/term/GO:0000981
polysome	Gene Ontology	GO:0005844	2	10	0.0114266	0.209106	MSI2|RWDD1	http://amigo.geneontology.org/amigo/term/GO:0005844
rRNA binding	Gene Ontology	GO:0019843	2	10	0.0114266	0.209106	RPS5|RPS9	http://amigo.geneontology.org/amigo/term/GO:0019843
clathrin adaptor activity	Gene Ontology	GO:0035615	2	10	0.0114266	0.209106	AP1M2|HIP1R	http://amigo.geneontology.org/amigo/term/GO:0035615
transcription factor binding	Gene Ontology	GO:0008134	4	61	0.0124614	0.222482	FOXO3|NR0B2|APBB3|KEAP1	http://amigo.geneontology.org/amigo/term/GO:0008134
ruffle membrane	Gene Ontology	GO:0032587	2	11	0.013382	0.227805	EPS8L1|AIF1L	http://amigo.geneontology.org/amigo/term/GO:0032587
resolution of meiotic recombination intermediates	Gene Ontology	GO:0000712	2	11	0.013382	0.227805	EME1|TOP2A	http://amigo.geneontology.org/amigo/term/GO:0000712
RNA polymerase II cis-regulatory region sequence-specific DNA binding	Gene Ontology	GO:0000978	10	310	0.0139904	0.232749	NEUROD2|ZNF304|ZNF697|ZNF580|NKX1-2|ZNF584|DLX4|ZNF134|ZBTB34|ZSCAN22	http://amigo.geneontology.org/amigo/term/GO:0000978
P-body	Gene Ontology	GO:0000932	3	35	0.0153692	0.235937	SAMD4A|CNOT3|DCP1B	http://amigo.geneontology.org/amigo/term/GO:0000932
collagen-containing extracellular matrix	Gene Ontology	GO:0062023	3	35	0.0153692	0.235937	FCN3|ANGPTL6|MATN2	http://amigo.geneontology.org/amigo/term/GO:0062023
vesicle docking involved in exocytosis	Gene Ontology	GO:0006904	2	12	0.0154713	0.235937	STXBP1|RAB3D	http://amigo.geneontology.org/amigo/term/GO:0006904
protein phosphatase type 2A complex	Gene Ontology	GO:0000159	2	12	0.0154713	0.235937	PPP2R5D|PTPA	http://amigo.geneontology.org/amigo/term/GO:0000159
vesicle-mediated transport	Gene Ontology	GO:0016192	4	67	0.0167759	0.249026	STXBP1|AP1M2|AP4B1|SYT6	http://amigo.geneontology.org/amigo/term/GO:0016192
protein tyrosine phosphatase activity	Gene Ontology	GO:0004725	3	37	0.0176412	0.249026	CDKN3|PTPRM|EYA3	http://amigo.geneontology.org/amigo/term/GO:0004725
U2-type prespliceosome	Gene Ontology	GO:0071004	2	13	0.0176904	0.249026	U2AF2|LUC7L3	http://amigo.geneontology.org/amigo/term/GO:0071004
nuclear localization sequence binding	Gene Ontology	GO:0008139	2	13	0.0176904	0.249026	NUP214|KPNB1	http://amigo.geneontology.org/amigo/term/GO:0008139
nucleolus	Gene Ontology	GO:0005730	5	105	0.0183388	0.253283	RPL22|MED1|KRI1|RRP36|DDX55	http://amigo.geneontology.org/amigo/term/GO:0005730
Golgi organization	Gene Ontology	GO:0007030	3	38	0.0188435	0.255434	TMED1|TMED2|LRRK2	http://amigo.geneontology.org/amigo/term/GO:0007030
transcription corepressor activity	Gene Ontology	GO:0003714	4	72	0.0210052	0.27956	NR0B2|HDAC3|MED1|TRIM28	http://amigo.geneontology.org/amigo/term/GO:0003714
spindle	Gene Ontology	GO:0005819	2	15	0.0225023	0.281839	CLTC|KIF2B	http://amigo.geneontology.org/amigo/term/GO:0005819
regulation of metabolic process	Gene Ontology	GO:0019222	2	15	0.0225023	0.281839	S1PR2|S1PR5	http://amigo.geneontology.org/amigo/term/GO:0019222
structural constituent of nuclear pore	Gene Ontology	GO:0017056	2	15	0.0225023	0.281839	NUP188|NUP214	http://amigo.geneontology.org/amigo/term/GO:0017056
intracellular anatomical structure	Gene Ontology	GO:0005622	3	41	0.0227165	0.281839	ABI3|PARP6|DHX40	http://amigo.geneontology.org/amigo/term/GO:0005622
protein serine/threonine kinase activity	Gene Ontology	GO:0004674	6	155	0.0245887	0.289364	LRRK2|BRSK1|PKN3|PRKDC|PDK2|TTBK1	http://amigo.geneontology.org/amigo/term/GO:0004674
Rho protein signal transduction	Gene Ontology	GO:0007266	2	16	0.0250874	0.289364	EPS8L1|CDC42EP5	http://amigo.geneontology.org/amigo/term/GO:0007266
glucose homeostasis	Gene Ontology	GO:0042593	2	16	0.0250874	0.289364	FOXO3|PDK2	http://amigo.geneontology.org/amigo/term/GO:0042593
cell differentiation	Gene Ontology	GO:0030154	7	200	0.0252996	0.289364	PRRC2B|FGR|NKX1-2|NR2E1|DLX4|HES2|EYA3	http://amigo.geneontology.org/amigo/term/GO:0030154
membrane raft	Gene Ontology	GO:0045121	2	17	0.027787	0.31132	CD14|LRRK2	http://amigo.geneontology.org/amigo/term/GO:0045121
cell fate specification	Gene Ontology	GO:0001708	2	18	0.0305975	0.315337	TBX21|TBX15	http://amigo.geneontology.org/amigo/term/GO:0001708
RNA polymerase II activating transcription factor binding	Gene Ontology	GO:0001102	2	18	0.0305975	0.315337	TBX21|TBX15	http://amigo.geneontology.org/amigo/term/GO:0001102
fatty acid metabolic process	Gene Ontology	GO:0006631	2	18	0.0305975	0.315337	ACOT7|ACSF2	http://amigo.geneontology.org/amigo/term/GO:0006631
substrate adhesion-dependent cell spreading	Gene Ontology	GO:0034446	2	18	0.0305975	0.315337	LAMC3|NTNG2	http://amigo.geneontology.org/amigo/term/GO:0034446
positive regulation of transcription by RNA polymerase II	Gene Ontology	GO:0045944	10	359	0.03318	0.315337	TBX21|SP2|ZNF697|LMX1B|FOXO3|NKX1-2|MED1|TBX15|DLX4|KAT7	http://amigo.geneontology.org/amigo/term/GO:0045944
negative regulation of translation	Gene Ontology	GO:0017148	2	19	0.0335153	0.315337	SAMD4A|CNOT3	http://amigo.geneontology.org/amigo/term/GO:0017148
defense response to bacterium	Gene Ontology	GO:0042742	2	19	0.0335153	0.315337	LPO|EPX	http://amigo.geneontology.org/amigo/term/GO:0042742
structural constituent of ribosome	Gene Ontology	GO:0003735	4	84	0.0336272	0.315337	RPS5|RPS9|RPL7L1|RPL23	http://amigo.geneontology.org/amigo/term/GO:0003735
double-strand break repair	Gene Ontology	GO:0006302	2	20	0.0365369	0.315337	EME1|PRKDC	http://amigo.geneontology.org/amigo/term/GO:0006302
COPII-coated ER to Golgi transport vesicle	Gene Ontology	GO:0030134	2	21	0.0396589	0.315337	TMED2|TMED1	http://amigo.geneontology.org/amigo/term/GO:0030134
endoplasmic reticulum-Golgi intermediate compartment	Gene Ontology	GO:0005793	2	21	0.0396589	0.315337	TMED2|TMED1	http://amigo.geneontology.org/amigo/term/GO:0005793
Rho guanyl-nucleotide exchange factor activity	Gene Ontology	GO:0005089	2	23	0.0461908	0.315337	FGD4|ARHGEF26	http://amigo.geneontology.org/amigo/term/GO:0005089
cation channel activity	Gene Ontology	GO:0005261	2	23	0.0461908	0.315337	CALHM5|CALHM4	http://amigo.geneontology.org/amigo/term/GO:0005261
lamellipodium	Gene Ontology	GO:0030027	2	24	0.0495944	0.315337	ABI3|PTPRM	http://amigo.geneontology.org/amigo/term/GO:0030027
tissue development	Gene Ontology	GO:0009888	2	25	0.0530854	0.315337	LAMC3|NTNG2	http://amigo.geneontology.org/amigo/term/GO:0009888
postsynaptic membrane	Gene Ontology	GO:0045211	2	25	0.0530854	0.315337	KCND3|GPHN	http://amigo.geneontology.org/amigo/term/GO:0045211
mitochondrion	Gene Ontology	GO:0005739	9	342	0.0557825	0.315337	QRSL1|ACP6|IFI6|MTO1|WARS2|HMGCS2|PDK2|FPGS|DNAJC11	http://amigo.geneontology.org/amigo/term/GO:0005739
chromatin	Gene Ontology	GO:0000785	2	26	0.056661	0.315337	TRIM45|TRIM28	http://amigo.geneontology.org/amigo/term/GO:0000785
syntaxin binding	Gene Ontology	GO:0019905	2	26	0.056661	0.315337	STXBP1|SYT6	http://amigo.geneontology.org/amigo/term/GO:0019905
Golgi apparatus	Gene Ontology	GO:0005794	6	192	0.0572922	0.315337	B3GNT4|TMED2|TMED1|LRRK2|GPR107|BICD1	http://amigo.geneontology.org/amigo/term/GO:0005794
T cell receptor signaling pathway	Gene Ontology	GO:0050852	2	27	0.060318	0.315337	PTPN22|VTCN1	http://amigo.geneontology.org/amigo/term/GO:0050852
protein serine/threonine phosphatase activity	Gene Ontology	GO:0004722	2	27	0.060318	0.315337	PPM1E|LRRK2	http://amigo.geneontology.org/amigo/term/GO:0004722
mRNA splicing, via spliceosome	Gene Ontology	GO:0000398	3	62	0.0607975	0.315337	PRPF31|CWC25|SNRNP35	http://amigo.geneontology.org/amigo/term/GO:0000398
potassium ion transmembrane transport	Gene Ontology	GO:0071805	3	62	0.0607975	0.315337	KCND3|SLC9A1|KCNS2	http://amigo.geneontology.org/amigo/term/GO:0071805
protein phosphorylation	Gene Ontology	GO:0006468	3	63	0.0630676	0.315337	CDK9|BRSK1|LRRK2	http://amigo.geneontology.org/amigo/term/GO:0006468
cytosolic small ribosomal subunit	Gene Ontology	GO:0022627	2	28	0.0640536	0.315337	RPS5|RPS9	http://amigo.geneontology.org/amigo/term/GO:0022627
mediator complex	Gene Ontology	GO:0016592	2	28	0.0640536	0.315337	CDK9|MED1	http://amigo.geneontology.org/amigo/term/GO:0016592
intracellular protein transport	Gene Ontology	GO:0006886	4	105	0.0643777	0.315337	STXBP1|TBC1D13|TMED2|TMED1	http://amigo.geneontology.org/amigo/term/GO:0006886
endoplasmic reticulum membrane	Gene Ontology	GO:0005789	4	109	0.0714718	0.315337	SLC27A4|GDPD1|MTDH|NUS1	http://amigo.geneontology.org/amigo/term/GO:0005789
double-strand break repair via homologous recombination	Gene Ontology	GO:0000724	2	30	0.0717493	0.315337	RAD51AP2|RAD52	http://amigo.geneontology.org/amigo/term/GO:0000724
extrinsic component of cytoplasmic side of plasma membrane	Gene Ontology	GO:0031234	2	30	0.0717493	0.315337	GRAMD2A|FGR	http://amigo.geneontology.org/amigo/term/GO:0031234
peptide binding	Gene Ontology	GO:0042277	2	31	0.0757038	0.315337	SSTR1|NPEPPS	http://amigo.geneontology.org/amigo/term/GO:0042277
protein glycosylation	Gene Ontology	GO:0006486	2	31	0.0757038	0.315337	B3GNT4|NUS1	http://amigo.geneontology.org/amigo/term/GO:0006486
transmembrane transport	Gene Ontology	GO:0055085	2	31	0.0757038	0.315337	ANO6|ABCC3	http://amigo.geneontology.org/amigo/term/GO:0055085
membrane	Gene Ontology	GO:0016020	7	259	0.076734	0.315337	SLC39A11|PGRMC2|PLPP7|TOM1L1|GPR107|DNM1L|ABCC3	http://amigo.geneontology.org/amigo/term/GO:0016020
Rho GTPase binding	Gene Ontology	GO:0017048	1	5	0.0799452	0.315337	LRRK2	http://amigo.geneontology.org/amigo/term/GO:0017048
U4 snRNP	Gene Ontology	GO:0005687	1	5	0.0799452	0.315337	PRPF31	http://amigo.geneontology.org/amigo/term/GO:0005687
MICOS complex	Gene Ontology	GO:0061617	1	5	0.0799452	0.315337	DNAJC11	http://amigo.geneontology.org/amigo/term/GO:0061617
receptor antagonist activity	Gene Ontology	GO:0048019	1	5	0.0799452	0.315337	WFIKKN2	http://amigo.geneontology.org/amigo/term/GO:0048019
tRNA processing	Gene Ontology	GO:0008033	1	5	0.0799452	0.315337	POP1	http://amigo.geneontology.org/amigo/term/GO:0008033
exosome (RNase complex)	Gene Ontology	GO:0000178	1	5	0.0799452	0.315337	EXOSC2	http://amigo.geneontology.org/amigo/term/GO:0000178
positive regulation of RNA polymerase II transcription preinitiation complex assembly	Gene Ontology	GO:0045899	1	5	0.0799452	0.315337	PSMC6	http://amigo.geneontology.org/amigo/term/GO:0045899
regulation of translational initiation	Gene Ontology	GO:0006446	1	5	0.0799452	0.315337	GLE1	http://amigo.geneontology.org/amigo/term/GO:0006446
UDP-N-acetylglucosamine biosynthetic process	Gene Ontology	GO:0006048	1	5	0.0799452	0.315337	GNPDA1	http://amigo.geneontology.org/amigo/term/GO:0006048
osteoblast differentiation	Gene Ontology	GO:0001649	1	5	0.0799452	0.315337	NOG	http://amigo.geneontology.org/amigo/term/GO:0001649
toll-like receptor 4 signaling pathway	Gene Ontology	GO:0034142	1	5	0.0799452	0.315337	CD14	http://amigo.geneontology.org/amigo/term/GO:0034142
ribonuclease MRP complex	Gene Ontology	GO:0000172	1	5	0.0799452	0.315337	POP1	http://amigo.geneontology.org/amigo/term/GO:0000172
negative regulation of pyruvate dehydrogenase activity	Gene Ontology	GO:1904183	1	5	0.0799452	0.315337	PDK2	http://amigo.geneontology.org/amigo/term/GO:1904183
positive regulation of TORC1 signaling	Gene Ontology	GO:1904263	1	5	0.0799452	0.315337	GPR137C	http://amigo.geneontology.org/amigo/term/GO:1904263
dorsal/ventral pattern formation	Gene Ontology	GO:0009953	1	5	0.0799452	0.315337	NOG	http://amigo.geneontology.org/amigo/term/GO:0009953
mitochondrial proton-transporting ATP synthase complex, coupling factor F(o)	Gene Ontology	GO:0000276	1	5	0.0799452	0.315337	ATP5MC1	http://amigo.geneontology.org/amigo/term/GO:0000276
nuclear polyadenylation-dependent rRNA catabolic process	Gene Ontology	GO:0071035	1	5	0.0799452	0.315337	EXOSC2	http://amigo.geneontology.org/amigo/term/GO:0071035
perikaryon	Gene Ontology	GO:0043204	1	5	0.0799452	0.315337	LRRK2	http://amigo.geneontology.org/amigo/term/GO:0043204
intrinsic apoptotic signaling pathway in response to endoplasmic reticulum stress	Gene Ontology	GO:0070059	1	5	0.0799452	0.315337	TMEM117	http://amigo.geneontology.org/amigo/term/GO:0070059
negative regulation of interleukin-6 production	Gene Ontology	GO:0032715	1	5	0.0799452	0.315337	PTPN22	http://amigo.geneontology.org/amigo/term/GO:0032715
ESCRT I complex	Gene Ontology	GO:0000813	1	5	0.0799452	0.315337	MVB12B	http://amigo.geneontology.org/amigo/term/GO:0000813
alpha-(1->3)-fucosyltransferase activity	Gene Ontology	GO:0046920	1	5	0.0799452	0.315337	FUT10	http://amigo.geneontology.org/amigo/term/GO:0046920
cellular response to estradiol stimulus	Gene Ontology	GO:0071392	1	5	0.0799452	0.315337	SSTR1	http://amigo.geneontology.org/amigo/term/GO:0071392
MAP kinase kinase kinase activity	Gene Ontology	GO:0004709	1	5	0.0799452	0.315337	MAP3K6	http://amigo.geneontology.org/amigo/term/GO:0004709
postsynaptic neurotransmitter receptor diffusion trapping	Gene Ontology	GO:0098970	1	5	0.0799452	0.315337	GPHN	http://amigo.geneontology.org/amigo/term/GO:0098970
endonucleolytic cleavage in ITS1 to separate SSU-rRNA from 5.8S rRNA and LSU-rRNA from tricistronic rRNA transcript (SSU-rRNA, 5.8S rRNA, LSU-rRNA)	Gene Ontology	GO:0000447	1	5	0.0799452	0.315337	KRI1	http://amigo.geneontology.org/amigo/term/GO:0000447
phosphoric diester hydrolase activity	Gene Ontology	GO:0008081	1	5	0.0799452	0.315337	GDPD1	http://amigo.geneontology.org/amigo/term/GO:0008081
T cell differentiation	Gene Ontology	GO:0030217	1	5	0.0799452	0.315337	PTPN22	http://amigo.geneontology.org/amigo/term/GO:0030217
regulation of mitochondrion organization	Gene Ontology	GO:0010821	1	5	0.0799452	0.315337	DNM1L	http://amigo.geneontology.org/amigo/term/GO:0010821
actin filament bundle	Gene Ontology	GO:0032432	1	5	0.0799452	0.315337	MARCKS	http://amigo.geneontology.org/amigo/term/GO:0032432
ATP transmembrane transporter activity	Gene Ontology	GO:0005347	1	5	0.0799452	0.315337	SLC25A25	http://amigo.geneontology.org/amigo/term/GO:0005347
organelle fission	Gene Ontology	GO:0048285	1	5	0.0799452	0.315337	DNM1L	http://amigo.geneontology.org/amigo/term/GO:0048285
Pwp2p-containing subcomplex of 90S preribosome	Gene Ontology	GO:0034388	1	5	0.0799452	0.315337	UTP18	http://amigo.geneontology.org/amigo/term/GO:0034388
nuclear polyadenylation-dependent tRNA catabolic process	Gene Ontology	GO:0071038	1	5	0.0799452	0.315337	EXOSC2	http://amigo.geneontology.org/amigo/term/GO:0071038
tRNA wobble uridine modification	Gene Ontology	GO:0002098	1	5	0.0799452	0.315337	MTO1	http://amigo.geneontology.org/amigo/term/GO:0002098
dynamin family protein polymerization involved in mitochondrial fission	Gene Ontology	GO:0003374	1	5	0.0799452	0.315337	DNM1L	http://amigo.geneontology.org/amigo/term/GO:0003374
chondroitin sulfate proteoglycan biosynthetic process	Gene Ontology	GO:0050650	1	5	0.0799452	0.315337	XYLT2	http://amigo.geneontology.org/amigo/term/GO:0050650
dynein complex binding	Gene Ontology	GO:0070840	1	5	0.0799452	0.315337	BICD1	http://amigo.geneontology.org/amigo/term/GO:0070840
nuclear envelope	Gene Ontology	GO:0005635	2	33	0.0838128	0.315337	PLPP7|TOR1B	http://amigo.geneontology.org/amigo/term/GO:0005635
protein dephosphorylation	Gene Ontology	GO:0006470	2	35	0.0921715	0.315337	PPP2R5D|PTPRM	http://amigo.geneontology.org/amigo/term/GO:0006470
voltage-gated potassium channel activity	Gene Ontology	GO:0005249	2	35	0.0921715	0.315337	KCND3|KCNS2	http://amigo.geneontology.org/amigo/term/GO:0005249
cytosolic large ribosomal subunit	Gene Ontology	GO:0022625	2	35	0.0921715	0.315337	RPL7L1|RPL23	http://amigo.geneontology.org/amigo/term/GO:0022625
cellular response to epidermal growth factor stimulus	Gene Ontology	GO:0071364	1	6	0.0926352	0.315337	MED1	http://amigo.geneontology.org/amigo/term/GO:0071364
intra-S DNA damage checkpoint	Gene Ontology	GO:0031573	1	6	0.0926352	0.315337	EME1	http://amigo.geneontology.org/amigo/term/GO:0031573
retina layer formation	Gene Ontology	GO:0010842	1	6	0.0926352	0.315337	PTPRM	http://amigo.geneontology.org/amigo/term/GO:0010842
extracellular matrix binding	Gene Ontology	GO:0050840	1	6	0.0926352	0.315337	SSC5D	http://amigo.geneontology.org/amigo/term/GO:0050840
CCR4-NOT core complex	Gene Ontology	GO:0030015	1	6	0.0926352	0.315337	CNOT3	http://amigo.geneontology.org/amigo/term/GO:0030015
proton-transporting ATPase activity, rotational mechanism	Gene Ontology	GO:0046961	1	6	0.0926352	0.315337	ATP6V0A2	http://amigo.geneontology.org/amigo/term/GO:0046961
fatty-acyl-CoA binding	Gene Ontology	GO:0000062	1	6	0.0926352	0.315337	ACOT7	http://amigo.geneontology.org/amigo/term/GO:0000062
negative regulation of endothelial cell proliferation	Gene Ontology	GO:0001937	1	6	0.0926352	0.315337	PTPRM	http://amigo.geneontology.org/amigo/term/GO:0001937
high voltage-gated calcium channel activity	Gene Ontology	GO:0008331	1	6	0.0926352	0.315337	CACNB1	http://amigo.geneontology.org/amigo/term/GO:0008331
spliceosomal tri-snRNP complex	Gene Ontology	GO:0097526	1	6	0.0926352	0.315337	PRPF31	http://amigo.geneontology.org/amigo/term/GO:0097526
negative regulation of MAP kinase activity	Gene Ontology	GO:0043407	1	6	0.0926352	0.315337	SPRY4	http://amigo.geneontology.org/amigo/term/GO:0043407
exonucleolytic catabolism of deadenylated mRNA	Gene Ontology	GO:0043928	1	6	0.0926352	0.315337	EXOSC2	http://amigo.geneontology.org/amigo/term/GO:0043928
snRNA 3'-end processing	Gene Ontology	GO:0034472	1	6	0.0926352	0.315337	INTS2	http://amigo.geneontology.org/amigo/term/GO:0034472
establishment of cell polarity	Gene Ontology	GO:0030010	1	6	0.0926352	0.315337	BRSK1	http://amigo.geneontology.org/amigo/term/GO:0030010
kinesin binding	Gene Ontology	GO:0019894	1	6	0.0926352	0.315337	TOR1B	http://amigo.geneontology.org/amigo/term/GO:0019894
SMN complex	Gene Ontology	GO:0032797	1	6	0.0926352	0.315337	GEMIN2	http://amigo.geneontology.org/amigo/term/GO:0032797
U4 snRNA 3'-end processing	Gene Ontology	GO:0034475	1	6	0.0926352	0.315337	EXOSC2	http://amigo.geneontology.org/amigo/term/GO:0034475
deadenylation-dependent decapping of nuclear-transcribed mRNA	Gene Ontology	GO:0000290	1	6	0.0926352	0.315337	DCP1B	http://amigo.geneontology.org/amigo/term/GO:0000290
lipopolysaccharide-mediated signaling pathway	Gene Ontology	GO:0031663	1	6	0.0926352	0.315337	CD14	http://amigo.geneontology.org/amigo/term/GO:0031663
protein kinase A binding	Gene Ontology	GO:0051018	1	6	0.0926352	0.315337	LRRK2	http://amigo.geneontology.org/amigo/term/GO:0051018
very long-chain fatty acid catabolic process	Gene Ontology	GO:0042760	1	6	0.0926352	0.315337	SLC27A4	http://amigo.geneontology.org/amigo/term/GO:0042760
positive regulation of interferon-beta production	Gene Ontology	GO:0032728	1	6	0.0926352	0.315337	PTPN22	http://amigo.geneontology.org/amigo/term/GO:0032728
histone demethylase activity	Gene Ontology	GO:0032452	1	6	0.0926352	0.315337	KDM5A	http://amigo.geneontology.org/amigo/term/GO:0032452
nuclear-transcribed mRNA catabolic process, exonucleolytic, 3'-5'	Gene Ontology	GO:0034427	1	6	0.0926352	0.315337	EXOSC2	http://amigo.geneontology.org/amigo/term/GO:0034427
replication fork	Gene Ontology	GO:0005657	1	6	0.0926352	0.315337	RAD51C	http://amigo.geneontology.org/amigo/term/GO:0005657
neuromuscular synaptic transmission	Gene Ontology	GO:0007274	1	6	0.0926352	0.315337	FCHSD1	http://amigo.geneontology.org/amigo/term/GO:0007274
positive regulation of interleukin-8 production	Gene Ontology	GO:0032757	1	6	0.0926352	0.315337	CD14	http://amigo.geneontology.org/amigo/term/GO:0032757
H4 histone acetyltransferase activity	Gene Ontology	GO:0010485	1	6	0.0926352	0.315337	KAT7	http://amigo.geneontology.org/amigo/term/GO:0010485
proton-transporting ATP synthase activity, rotational mechanism	Gene Ontology	GO:0046933	1	6	0.0926352	0.315337	ATP5MC1	http://amigo.geneontology.org/amigo/term/GO:0046933
U2-type spliceosomal complex	Gene Ontology	GO:0005684	1	6	0.0926352	0.315337	CWC25	http://amigo.geneontology.org/amigo/term/GO:0005684
ribonuclease P activity	Gene Ontology	GO:0004526	1	6	0.0926352	0.315337	POP1	http://amigo.geneontology.org/amigo/term/GO:0004526
central nervous system development	Gene Ontology	GO:0007417	2	36	0.0964383	0.315337	MARCKS|ZNF653	http://amigo.geneontology.org/amigo/term/GO:0007417
lysosomal membrane	Gene Ontology	GO:0005765	2	37	0.10076	0.315337	GPR137C|LAPTM4B	http://amigo.geneontology.org/amigo/term/GO:0005765
negative regulation of apoptotic process	Gene Ontology	GO:0043066	2	37	0.10076	0.315337	UBE2Z|MED1	http://amigo.geneontology.org/amigo/term/GO:0043066
voltage-gated potassium channel complex	Gene Ontology	GO:0008076	2	38	0.105135	0.315337	KCND3|KCNS2	http://amigo.geneontology.org/amigo/term/GO:0008076
catalytic step 2 spliceosome	Gene Ontology	GO:0071013	2	38	0.105135	0.315337	BCAS2|PNN	http://amigo.geneontology.org/amigo/term/GO:0071013
vacuolar proton-transporting V-type ATPase complex	Gene Ontology	GO:0016471	1	7	0.105151	0.315337	ATP6V0A2	http://amigo.geneontology.org/amigo/term/GO:0016471
formation of translation preinitiation complex	Gene Ontology	GO:0001731	1	7	0.105151	0.315337	DENR	http://amigo.geneontology.org/amigo/term/GO:0001731
protein homotetramerization	Gene Ontology	GO:0051289	1	7	0.105151	0.315337	GNMT	http://amigo.geneontology.org/amigo/term/GO:0051289
cell junction	Gene Ontology	GO:0030054	1	7	0.105151	0.315337	KDF1	http://amigo.geneontology.org/amigo/term/GO:0030054
axoneme assembly	Gene Ontology	GO:0035082	1	7	0.105151	0.315337	RSPH9	http://amigo.geneontology.org/amigo/term/GO:0035082
regulation of microtubule cytoskeleton organization	Gene Ontology	GO:0070507	1	7	0.105151	0.315337	BICD1	http://amigo.geneontology.org/amigo/term/GO:0070507
laminin complex	Gene Ontology	GO:0043256	1	7	0.105151	0.315337	NTNG2	http://amigo.geneontology.org/amigo/term/GO:0043256
histone H2A-K119 monoubiquitination	Gene Ontology	GO:0036353	1	7	0.105151	0.315337	PCGF2	http://amigo.geneontology.org/amigo/term/GO:0036353
metalloaminopeptidase activity	Gene Ontology	GO:0070006	1	7	0.105151	0.315337	NPEPPS	http://amigo.geneontology.org/amigo/term/GO:0070006
glycine binding	Gene Ontology	GO:0016594	1	7	0.105151	0.315337	GNMT	http://amigo.geneontology.org/amigo/term/GO:0016594
enzyme regulator activity	Gene Ontology	GO:0030234	1	7	0.105151	0.315337	DCP1B	http://amigo.geneontology.org/amigo/term/GO:0030234
chromatin silencing	Gene Ontology	GO:0006342	1	7	0.105151	0.315337	PCGF2	http://amigo.geneontology.org/amigo/term/GO:0006342
negative regulation of T cell activation	Gene Ontology	GO:0050868	1	7	0.105151	0.315337	PTPN22	http://amigo.geneontology.org/amigo/term/GO:0050868
zinc ion transmembrane transport	Gene Ontology	GO:0071577	1	7	0.105151	0.315337	SLC39A11	http://amigo.geneontology.org/amigo/term/GO:0071577
positive regulation of DNA repair	Gene Ontology	GO:0045739	1	7	0.105151	0.315337	EYA3	http://amigo.geneontology.org/amigo/term/GO:0045739
negative regulation of fibroblast growth factor receptor signaling pathway	Gene Ontology	GO:0040037	1	7	0.105151	0.315337	SPRY4	http://amigo.geneontology.org/amigo/term/GO:0040037
negative regulation of cell growth	Gene Ontology	GO:0030308	1	7	0.105151	0.315337	CGRRF1	http://amigo.geneontology.org/amigo/term/GO:0030308
cellular response to stress	Gene Ontology	GO:0033554	1	7	0.105151	0.315337	MAP3K6	http://amigo.geneontology.org/amigo/term/GO:0033554
transforming growth factor beta binding	Gene Ontology	GO:0050431	1	7	0.105151	0.315337	WFIKKN2	http://amigo.geneontology.org/amigo/term/GO:0050431
ATPase binding	Gene Ontology	GO:0051117	1	7	0.105151	0.315337	ATP6V0A2	http://amigo.geneontology.org/amigo/term/GO:0051117
endoplasmic reticulum lumen	Gene Ontology	GO:0005788	1	7	0.105151	0.315337	TOR1B	http://amigo.geneontology.org/amigo/term/GO:0005788
heart looping	Gene Ontology	GO:0001947	1	7	0.105151	0.315337	TBX21	http://amigo.geneontology.org/amigo/term/GO:0001947
intrinsic component of endoplasmic reticulum membrane	Gene Ontology	GO:0031227	1	7	0.105151	0.315337	GRAMD2A	http://amigo.geneontology.org/amigo/term/GO:0031227
vacuolar acidification	Gene Ontology	GO:0007035	1	7	0.105151	0.315337	ATP6V0A2	http://amigo.geneontology.org/amigo/term/GO:0007035
replication fork processing	Gene Ontology	GO:0031297	1	7	0.105151	0.315337	EME1	http://amigo.geneontology.org/amigo/term/GO:0031297
sequence-specific DNA binding	Gene Ontology	GO:0043565	4	126	0.105767	0.315337	FOXO3|DLX4|NKX1-2|ZNF582	http://amigo.geneontology.org/amigo/term/GO:0043565
transcription regulatory region sequence-specific DNA binding	Gene Ontology	GO:0000976	3	81	0.110117	0.315337	SP2|NFE2L1|ZNF697	http://amigo.geneontology.org/amigo/term/GO:0000976
endosome	Gene Ontology	GO:0005768	3	82	0.113043	0.315337	RAB3D|TOM1L1|LRRK2	http://amigo.geneontology.org/amigo/term/GO:0005768
Rac guanyl-nucleotide exchange factor activity	Gene Ontology	GO:0030676	1	8	0.117494	0.315337	EPS8L1	http://amigo.geneontology.org/amigo/term/GO:0030676
tau-protein kinase activity	Gene Ontology	GO:0050321	1	8	0.117494	0.315337	BRSK1	http://amigo.geneontology.org/amigo/term/GO:0050321
ribosome	Gene Ontology	GO:0005840	1	8	0.117494	0.315337	RPS5	http://amigo.geneontology.org/amigo/term/GO:0005840
entrainment of circadian clock by photoperiod	Gene Ontology	GO:0043153	1	8	0.117494	0.315337	FBXL12	http://amigo.geneontology.org/amigo/term/GO:0043153
exonucleolytic trimming to generate mature 3'-end of 5.8S rRNA from tricistronic rRNA transcript (SSU-rRNA, 5.8S rRNA, LSU-rRNA)	Gene Ontology	GO:0000467	1	8	0.117494	0.315337	EXOSC2	http://amigo.geneontology.org/amigo/term/GO:0000467
circadian rhythm	Gene Ontology	GO:0007623	1	8	0.117494	0.315337	NR0B2	http://amigo.geneontology.org/amigo/term/GO:0007623
cytoskeletal anchor activity	Gene Ontology	GO:0008093	1	8	0.117494	0.315337	BICD1	http://amigo.geneontology.org/amigo/term/GO:0008093
positive regulation of actin filament polymerization	Gene Ontology	GO:0030838	1	8	0.117494	0.315337	CDC42EP5	http://amigo.geneontology.org/amigo/term/GO:0030838
cristae formation	Gene Ontology	GO:0042407	1	8	0.117494	0.315337	DNAJC11	http://amigo.geneontology.org/amigo/term/GO:0042407
translation initiation factor binding	Gene Ontology	GO:0031369	1	8	0.117494	0.315337	GLE1	http://amigo.geneontology.org/amigo/term/GO:0031369
SWI/SNF complex	Gene Ontology	GO:0016514	1	8	0.117494	0.315337	BICRAL	http://amigo.geneontology.org/amigo/term/GO:0016514
negative regulation of angiogenesis	Gene Ontology	GO:0016525	1	8	0.117494	0.315337	PTPRM	http://amigo.geneontology.org/amigo/term/GO:0016525
integrator complex	Gene Ontology	GO:0032039	1	8	0.117494	0.315337	INTS2	http://amigo.geneontology.org/amigo/term/GO:0032039
phosphatidylinositol-3,5-bisphosphate binding	Gene Ontology	GO:0080025	1	8	0.117494	0.315337	HIP1R	http://amigo.geneontology.org/amigo/term/GO:0080025
lysophospholipase activity	Gene Ontology	GO:0004622	1	8	0.117494	0.315337	GDPD1	http://amigo.geneontology.org/amigo/term/GO:0004622
response to drug	Gene Ontology	GO:0042493	1	8	0.117494	0.315337	PTPRM	http://amigo.geneontology.org/amigo/term/GO:0042493
fucosylation	Gene Ontology	GO:0036065	1	8	0.117494	0.315337	FUT10	http://amigo.geneontology.org/amigo/term/GO:0036065
phosphorylation of RNA polymerase II C-terminal domain	Gene Ontology	GO:0070816	1	8	0.117494	0.315337	GTF2H3	http://amigo.geneontology.org/amigo/term/GO:0070816
ATP synthesis coupled proton transport	Gene Ontology	GO:0015986	1	8	0.117494	0.315337	ATP5MC1	http://amigo.geneontology.org/amigo/term/GO:0015986
RNA polymerase II CTD heptapeptide repeat kinase activity	Gene Ontology	GO:0008353	1	8	0.117494	0.315337	CDK9	http://amigo.geneontology.org/amigo/term/GO:0008353
transcription factor TFIIH holo complex	Gene Ontology	GO:0005675	1	8	0.117494	0.315337	GTF2H3	http://amigo.geneontology.org/amigo/term/GO:0005675
cysteine-type endopeptidase inhibitor activity	Gene Ontology	GO:0004869	1	8	0.117494	0.315337	UBE2Z	http://amigo.geneontology.org/amigo/term/GO:0004869
proteasome regulatory particle, base subcomplex	Gene Ontology	GO:0008540	1	8	0.117494	0.315337	PSMC6	http://amigo.geneontology.org/amigo/term/GO:0008540
basement membrane assembly	Gene Ontology	GO:0070831	1	8	0.117494	0.315337	NTNG2	http://amigo.geneontology.org/amigo/term/GO:0070831
ruffle	Gene Ontology	GO:0001726	1	8	0.117494	0.315337	ARAP3	http://amigo.geneontology.org/amigo/term/GO:0001726
neurotransmitter secretion	Gene Ontology	GO:0007269	1	8	0.117494	0.315337	STXBP1	http://amigo.geneontology.org/amigo/term/GO:0007269
cellular response to glucose starvation	Gene Ontology	GO:0042149	1	8	0.117494	0.315337	BRSK1	http://amigo.geneontology.org/amigo/term/GO:0042149
cytoplasmic exosome (RNase complex)	Gene Ontology	GO:0000177	1	8	0.117494	0.315337	EXOSC2	http://amigo.geneontology.org/amigo/term/GO:0000177
poly(A)-specific ribonuclease activity	Gene Ontology	GO:0004535	1	8	0.117494	0.315337	CNOT3	http://amigo.geneontology.org/amigo/term/GO:0004535
endoplasmic reticulum exit site	Gene Ontology	GO:0070971	1	8	0.117494	0.315337	LRRK2	http://amigo.geneontology.org/amigo/term/GO:0070971
anatomical structure development	Gene Ontology	GO:0048856	2	41	0.118553	0.315337	NR2E1|EYA3	http://amigo.geneontology.org/amigo/term/GO:0048856
neurogenesis	Gene Ontology	GO:0022008	1	9	0.129667	0.315337	PRDM12	http://amigo.geneontology.org/amigo/term/GO:0022008
diacylglycerol kinase activity	Gene Ontology	GO:0004143	1	9	0.129667	0.315337	DGKE	http://amigo.geneontology.org/amigo/term/GO:0004143
RNA processing	Gene Ontology	GO:0006396	1	9	0.129667	0.315337	NOL9	http://amigo.geneontology.org/amigo/term/GO:0006396
sodium:proton antiporter activity	Gene Ontology	GO:0015385	1	9	0.129667	0.315337	SLC9A1	http://amigo.geneontology.org/amigo/term/GO:0015385
glycerophospholipid catabolic process	Gene Ontology	GO:0046475	1	9	0.129667	0.315337	GDPD1	http://amigo.geneontology.org/amigo/term/GO:0046475
1-phosphatidylinositol-3-kinase regulator activity	Gene Ontology	GO:0046935	1	9	0.129667	0.315337	SOCS4	http://amigo.geneontology.org/amigo/term/GO:0046935
lipid phosphorylation	Gene Ontology	GO:0046834	1	9	0.129667	0.315337	DGKE	http://amigo.geneontology.org/amigo/term/GO:0046834
PRC1 complex	Gene Ontology	GO:0035102	1	9	0.129667	0.315337	PCGF2	http://amigo.geneontology.org/amigo/term/GO:0035102
animal organ development	Gene Ontology	GO:0048513	1	9	0.129667	0.315337	SPRY4	http://amigo.geneontology.org/amigo/term/GO:0048513
peptide catabolic process	Gene Ontology	GO:0043171	1	9	0.129667	0.315337	NPEPPS	http://amigo.geneontology.org/amigo/term/GO:0043171
mitochondrial fusion	Gene Ontology	GO:0008053	1	9	0.129667	0.315337	MIGA2	http://amigo.geneontology.org/amigo/term/GO:0008053
RNA phosphodiester bond hydrolysis, endonucleolytic	Gene Ontology	GO:0090502	1	9	0.129667	0.315337	POP1	http://amigo.geneontology.org/amigo/term/GO:0090502
protein ADP-ribosylation	Gene Ontology	GO:0006471	1	9	0.129667	0.315337	PARP6	http://amigo.geneontology.org/amigo/term/GO:0006471
long-chain fatty acid transporter activity	Gene Ontology	GO:0005324	1	9	0.129667	0.315337	SLC27A4	http://amigo.geneontology.org/amigo/term/GO:0005324
potassium:proton antiporter activity	Gene Ontology	GO:0015386	1	9	0.129667	0.315337	SLC9A1	http://amigo.geneontology.org/amigo/term/GO:0015386
-	Gene Ontology	GO:0046486	1	9	0.129667	0.315337	DGKE	http://amigo.geneontology.org/amigo/term/GO:0046486
regulation of Rho protein signal transduction	Gene Ontology	GO:0035023	1	9	0.129667	0.315337	EPS8L1	http://amigo.geneontology.org/amigo/term/GO:0035023
sodium ion import across plasma membrane	Gene Ontology	GO:0098719	1	9	0.129667	0.315337	SLC9A1	http://amigo.geneontology.org/amigo/term/GO:0098719
mRNA splice site selection	Gene Ontology	GO:0006376	1	9	0.129667	0.315337	LUC7L3	http://amigo.geneontology.org/amigo/term/GO:0006376
diacylglycerol metabolic process	Gene Ontology	GO:0046339	1	9	0.129667	0.315337	DGKE	http://amigo.geneontology.org/amigo/term/GO:0046339
negative regulation of cysteine-type endopeptidase activity involved in apoptotic process	Gene Ontology	GO:0043154	1	9	0.129667	0.315337	IFI6	http://amigo.geneontology.org/amigo/term/GO:0043154
small ribosomal subunit	Gene Ontology	GO:0015935	1	9	0.129667	0.315337	RPS9	http://amigo.geneontology.org/amigo/term/GO:0015935
nucleoside diphosphate kinase activity	Gene Ontology	GO:0004550	1	9	0.129667	0.315337	NME1	http://amigo.geneontology.org/amigo/term/GO:0004550
interstrand cross-link repair	Gene Ontology	GO:0036297	1	9	0.129667	0.315337	RAD51AP2	http://amigo.geneontology.org/amigo/term/GO:0036297
regulation of mRNA stability	Gene Ontology	GO:0043488	1	9	0.129667	0.315337	SAMD4A	http://amigo.geneontology.org/amigo/term/GO:0043488
monooxygenase activity	Gene Ontology	GO:0004497	1	9	0.129667	0.315337	FMO5	http://amigo.geneontology.org/amigo/term/GO:0004497
lipopolysaccharide binding	Gene Ontology	GO:0001530	1	9	0.129667	0.315337	CD14	http://amigo.geneontology.org/amigo/term/GO:0001530
nuclear exosome (RNase complex)	Gene Ontology	GO:0000176	1	9	0.129667	0.315337	EXOSC2	http://amigo.geneontology.org/amigo/term/GO:0000176
ubiquitin-protein transferase activity	Gene Ontology	GO:0004842	2	44	0.132368	0.317683	TRIM45|TRIM28	http://amigo.geneontology.org/amigo/term/GO:0004842
activation of GTPase activity	Gene Ontology	GO:0090630	2	44	0.132368	0.317683	TBC1D13|ARHGEF26	http://amigo.geneontology.org/amigo/term/GO:0090630
endoplasmic reticulum to Golgi vesicle-mediated transport	Gene Ontology	GO:0006888	2	44	0.132368	0.317683	TMED2|TMED1	http://amigo.geneontology.org/amigo/term/GO:0006888
RNA binding	Gene Ontology	GO:0003723	5	193	0.13967	0.318333	EXOSC2|DDX43|EIF2S1|DHX40|RPL7L1	http://amigo.geneontology.org/amigo/term/GO:0003723
nuclear import signal receptor activity	Gene Ontology	GO:0061608	1	10	0.141673	0.318333	KPNB1	http://amigo.geneontology.org/amigo/term/GO:0061608
mitochondrial fission	Gene Ontology	GO:0000266	1	10	0.141673	0.318333	DNM1L	http://amigo.geneontology.org/amigo/term/GO:0000266
dynein intermediate chain binding	Gene Ontology	GO:0045505	1	10	0.141673	0.318333	BICD1	http://amigo.geneontology.org/amigo/term/GO:0045505
poly-N-acetyllactosamine biosynthetic process	Gene Ontology	GO:0030311	1	10	0.141673	0.318333	B3GNT4	http://amigo.geneontology.org/amigo/term/GO:0030311
long-chain fatty acid-CoA ligase activity	Gene Ontology	GO:0004467	1	10	0.141673	0.318333	SLC27A4	http://amigo.geneontology.org/amigo/term/GO:0004467
5'-nucleotidase activity	Gene Ontology	GO:0008253	1	10	0.141673	0.318333	NT5DC1	http://amigo.geneontology.org/amigo/term/GO:0008253
regulation of actin filament polymerization	Gene Ontology	GO:0030833	1	10	0.141673	0.318333	FCHSD1	http://amigo.geneontology.org/amigo/term/GO:0030833
N-acetyllactosaminide beta-1,3-N-acetylglucosaminyltransferase activity	Gene Ontology	GO:0008532	1	10	0.141673	0.318333	B3GNT4	http://amigo.geneontology.org/amigo/term/GO:0008532
negative regulation of transforming growth factor beta receptor signaling pathway	Gene Ontology	GO:0030512	1	10	0.141673	0.318333	WFIKKN2	http://amigo.geneontology.org/amigo/term/GO:0030512
G2/M transition of mitotic cell cycle	Gene Ontology	GO:0000086	1	10	0.141673	0.318333	FBXL12	http://amigo.geneontology.org/amigo/term/GO:0000086
hematopoietic progenitor cell differentiation	Gene Ontology	GO:0002244	1	10	0.141673	0.318333	TMEM190	http://amigo.geneontology.org/amigo/term/GO:0002244
four-way junction DNA binding	Gene Ontology	GO:0000400	1	10	0.141673	0.318333	RAD51C	http://amigo.geneontology.org/amigo/term/GO:0000400
acyl-CoA hydrolase activity	Gene Ontology	GO:0047617	1	10	0.141673	0.318333	ACOT7	http://amigo.geneontology.org/amigo/term/GO:0047617
perinuclear region of cytoplasm	Gene Ontology	GO:0048471	2	46	0.141771	0.318333	PTPRM|RPL22	http://amigo.geneontology.org/amigo/term/GO:0048471
SNARE binding	Gene Ontology	GO:0000149	2	47	0.146525	0.321062	SYT6|LRRK2	http://amigo.geneontology.org/amigo/term/GO:0000149
regulation of cell population proliferation	Gene Ontology	GO:0042127	2	48	0.151311	0.321062	TNFRSF9|FGR	http://amigo.geneontology.org/amigo/term/GO:0042127
lens development in camera-type eye	Gene Ontology	GO:0002088	1	11	0.153513	0.321062	MED1	http://amigo.geneontology.org/amigo/term/GO:0002088
Prp19 complex	Gene Ontology	GO:0000974	1	11	0.153513	0.321062	BCAS2	http://amigo.geneontology.org/amigo/term/GO:0000974
clathrin-dependent endocytosis	Gene Ontology	GO:0072583	1	11	0.153513	0.321062	GPR107	http://amigo.geneontology.org/amigo/term/GO:0072583
monocarboxylic acid transport	Gene Ontology	GO:0015718	1	11	0.153513	0.321062	SLC16A1	http://amigo.geneontology.org/amigo/term/GO:0015718
maturation of LSU-rRNA from tricistronic rRNA transcript (SSU-rRNA, 5.8S rRNA, LSU-rRNA)	Gene Ontology	GO:0000463	1	11	0.153513	0.321062	RPL7L1	http://amigo.geneontology.org/amigo/term/GO:0000463
RNA polymerase I complex	Gene Ontology	GO:0005736	1	11	0.153513	0.321062	POLR1C	http://amigo.geneontology.org/amigo/term/GO:0005736
negative regulation of protein kinase activity	Gene Ontology	GO:0006469	1	11	0.153513	0.321062	PPM1E	http://amigo.geneontology.org/amigo/term/GO:0006469
monocarboxylic acid transmembrane transporter activity	Gene Ontology	GO:0008028	1	11	0.153513	0.321062	SLC16A1	http://amigo.geneontology.org/amigo/term/GO:0008028
4 iron, 4 sulfur cluster binding	Gene Ontology	GO:0051539	1	11	0.153513	0.321062	RSAD1	http://amigo.geneontology.org/amigo/term/GO:0051539
mitochondrial translation	Gene Ontology	GO:0032543	1	11	0.153513	0.321062	QRSL1	http://amigo.geneontology.org/amigo/term/GO:0032543
spliceosomal snRNP assembly	Gene Ontology	GO:0000387	1	11	0.153513	0.321062	GEMIN2	http://amigo.geneontology.org/amigo/term/GO:0000387
defense response	Gene Ontology	GO:0006952	1	11	0.153513	0.321062	SSC5D	http://amigo.geneontology.org/amigo/term/GO:0006952
neuromuscular junction development	Gene Ontology	GO:0007528	1	11	0.153513	0.321062	CACNB1	http://amigo.geneontology.org/amigo/term/GO:0007528
regulation of exocytosis	Gene Ontology	GO:0017157	1	11	0.153513	0.321062	RAB3D	http://amigo.geneontology.org/amigo/term/GO:0017157
nucleotide-excision repair	Gene Ontology	GO:0006289	1	11	0.153513	0.321062	GTF2H3	http://amigo.geneontology.org/amigo/term/GO:0006289
histone methyltransferase complex	Gene Ontology	GO:0035097	1	11	0.153513	0.321062	KDM5A	http://amigo.geneontology.org/amigo/term/GO:0035097
GTP-Rho binding	Gene Ontology	GO:0017049	1	11	0.153513	0.321062	CDC42EP5	http://amigo.geneontology.org/amigo/term/GO:0017049
transcription coregulator activity	Gene Ontology	GO:0003712	2	49	0.156127	0.325466	MTDH|MED1	http://amigo.geneontology.org/amigo/term/GO:0003712
DNA binding	Gene Ontology	GO:0003677	3	97	0.160152	0.325466	SNAI2|ZBTB43|TRIM28	http://amigo.geneontology.org/amigo/term/GO:0003677
ribosomal small subunit assembly	Gene Ontology	GO:0000028	1	12	0.165191	0.325466	RPS5	http://amigo.geneontology.org/amigo/term/GO:0000028
pyridoxal phosphate binding	Gene Ontology	GO:0030170	1	12	0.165191	0.325466	OAT	http://amigo.geneontology.org/amigo/term/GO:0030170
syntaxin-1 binding	Gene Ontology	GO:0017075	1	12	0.165191	0.325466	STXBP1	http://amigo.geneontology.org/amigo/term/GO:0017075
calcium ion-regulated exocytosis of neurotransmitter	Gene Ontology	GO:0048791	1	12	0.165191	0.325466	SYT6	http://amigo.geneontology.org/amigo/term/GO:0048791
protein sumoylation	Gene Ontology	GO:0016925	1	12	0.165191	0.325466	TRIM28	http://amigo.geneontology.org/amigo/term/GO:0016925
embryo development	Gene Ontology	GO:0009790	1	12	0.165191	0.325466	DLX4	http://amigo.geneontology.org/amigo/term/GO:0009790
PML body	Gene Ontology	GO:0016605	1	12	0.165191	0.325466	CALCOCO2	http://amigo.geneontology.org/amigo/term/GO:0016605
regulation of blood pressure	Gene Ontology	GO:0008217	1	12	0.165191	0.325466	UTS2	http://amigo.geneontology.org/amigo/term/GO:0008217
tRNA methylation	Gene Ontology	GO:0030488	1	12	0.165191	0.325466	MTO1	http://amigo.geneontology.org/amigo/term/GO:0030488
neuropeptide binding	Gene Ontology	GO:0042923	1	12	0.165191	0.325466	SSTR1	http://amigo.geneontology.org/amigo/term/GO:0042923
I-kappaB kinase/NF-kappaB signaling	Gene Ontology	GO:0007249	1	12	0.165191	0.325466	TBKBP1	http://amigo.geneontology.org/amigo/term/GO:0007249
magnesium-dependent protein serine/threonine phosphatase activity	Gene Ontology	GO:0004724	1	12	0.165191	0.325466	PPM1E	http://amigo.geneontology.org/amigo/term/GO:0004724
membrane fusion	Gene Ontology	GO:0061025	1	12	0.165191	0.325466	DNM1L	http://amigo.geneontology.org/amigo/term/GO:0061025
methyltransferase activity	Gene Ontology	GO:0008168	1	12	0.165191	0.325466	NTMT1	http://amigo.geneontology.org/amigo/term/GO:0008168
endoplasmic reticulum organization	Gene Ontology	GO:0007029	1	12	0.165191	0.325466	LRRK2	http://amigo.geneontology.org/amigo/term/GO:0007029
animal organ morphogenesis	Gene Ontology	GO:0009887	2	51	0.165845	0.325466	LAMC3|NTNG2	http://amigo.geneontology.org/amigo/term/GO:0009887
endomembrane system	Gene Ontology	GO:0012505	2	51	0.165845	0.325466	PGRMC2|RNF122	http://amigo.geneontology.org/amigo/term/GO:0012505
transcription coactivator activity	Gene Ontology	GO:0003713	2	52	0.170743	0.331374	BICRAL|MED1	http://amigo.geneontology.org/amigo/term/GO:0003713
actin filament binding	Gene Ontology	GO:0051015	3	101	0.173595	0.331374	AIF1L|MARCKS|HIP1R	http://amigo.geneontology.org/amigo/term/GO:0051015
transferase activity, transferring hexosyl groups	Gene Ontology	GO:0016758	1	13	0.176708	0.331374	B3GNT4	http://amigo.geneontology.org/amigo/term/GO:0016758
protein secretion	Gene Ontology	GO:0009306	1	13	0.176708	0.331374	RAB3D	http://amigo.geneontology.org/amigo/term/GO:0009306
mitochondrial membrane	Gene Ontology	GO:0031966	1	13	0.176708	0.331374	DNM1L	http://amigo.geneontology.org/amigo/term/GO:0031966
amyloid-beta binding	Gene Ontology	GO:0001540	1	13	0.176708	0.331374	APBB3	http://amigo.geneontology.org/amigo/term/GO:0001540
neuromuscular junction	Gene Ontology	GO:0031594	1	13	0.176708	0.331374	FCHSD1	http://amigo.geneontology.org/amigo/term/GO:0031594
regulation of apoptotic process	Gene Ontology	GO:0042981	1	13	0.176708	0.331374	ABL1	http://amigo.geneontology.org/amigo/term/GO:0042981
zinc ion transmembrane transporter activity	Gene Ontology	GO:0005385	1	13	0.176708	0.331374	SLC39A11	http://amigo.geneontology.org/amigo/term/GO:0005385
negative regulation of BMP signaling pathway	Gene Ontology	GO:0030514	1	13	0.176708	0.331374	NOG	http://amigo.geneontology.org/amigo/term/GO:0030514
dephosphorylation	Gene Ontology	GO:0016311	1	13	0.176708	0.331374	ACP6	http://amigo.geneontology.org/amigo/term/GO:0016311
regulation of mitotic cell cycle	Gene Ontology	GO:0007346	1	13	0.176708	0.331374	CDK5RAP3	http://amigo.geneontology.org/amigo/term/GO:0007346
acyl-CoA metabolic process	Gene Ontology	GO:0006637	1	13	0.176708	0.331374	ACOT7	http://amigo.geneontology.org/amigo/term/GO:0006637
ribosome binding	Gene Ontology	GO:0043022	1	13	0.176708	0.331374	EIF2S1	http://amigo.geneontology.org/amigo/term/GO:0043022
U12-type spliceosomal complex	Gene Ontology	GO:0005689	1	13	0.176708	0.331374	SNRNP35	http://amigo.geneontology.org/amigo/term/GO:0005689
chromatin binding	Gene Ontology	GO:0003682	3	102	0.177004	0.331374	SET|MED1|KLHDC3	http://amigo.geneontology.org/amigo/term/GO:0003682
intracellular membrane-bounded organelle	Gene Ontology	GO:0043231	4	158	0.185878	0.343303	DOLPP1|AP1M2|LRRK2|HIP1R	http://amigo.geneontology.org/amigo/term/GO:0043231
regulation of calcium ion-dependent exocytosis	Gene Ontology	GO:0017158	1	14	0.188066	0.343303	SYT6	http://amigo.geneontology.org/amigo/term/GO:0017158
reciprocal meiotic recombination	Gene Ontology	GO:0007131	1	14	0.188066	0.343303	RAD51C	http://amigo.geneontology.org/amigo/term/GO:0007131
telomere maintenance	Gene Ontology	GO:0000723	1	14	0.188066	0.343303	PRKDC	http://amigo.geneontology.org/amigo/term/GO:0000723
single-stranded RNA binding	Gene Ontology	GO:0003727	1	14	0.188066	0.343303	ODF1	http://amigo.geneontology.org/amigo/term/GO:0003727
regulation of neurogenesis	Gene Ontology	GO:0050767	1	14	0.188066	0.343303	HES2	http://amigo.geneontology.org/amigo/term/GO:0050767
Ras protein signal transduction	Gene Ontology	GO:0007265	1	14	0.188066	0.343303	NRAS	http://amigo.geneontology.org/amigo/term/GO:0007265
precatalytic spliceosome	Gene Ontology	GO:0071011	1	14	0.188066	0.343303	PRPF31	http://amigo.geneontology.org/amigo/term/GO:0071011
actin filament organization	Gene Ontology	GO:0007015	2	56	0.190557	0.346603	MARCKS|HIP1R	http://amigo.geneontology.org/amigo/term/GO:0007015
cell surface	Gene Ontology	GO:0009986	3	106	0.190821	0.346603	CD58|CD14|NOTCH2	http://amigo.geneontology.org/amigo/term/GO:0009986
cytoplasmic vesicle	Gene Ontology	GO:0031410	2	57	0.195559	0.348125	AP1M2|RAB3D	http://amigo.geneontology.org/amigo/term/GO:0031410
microtubule binding	Gene Ontology	GO:0008017	3	108	0.19783	0.348125	DNM1L|CFAP157|KIF2B	http://amigo.geneontology.org/amigo/term/GO:0008017
microvillus	Gene Ontology	GO:0005902	1	15	0.199268	0.348125	SLC27A4	http://amigo.geneontology.org/amigo/term/GO:0005902
RNA polymerase II transcription regulator complex	Gene Ontology	GO:0090575	1	15	0.199268	0.348125	TRIM28	http://amigo.geneontology.org/amigo/term/GO:0090575
gap junction channel activity	Gene Ontology	GO:0005243	1	15	0.199268	0.348125	GJA5	http://amigo.geneontology.org/amigo/term/GO:0005243
U1 snRNP	Gene Ontology	GO:0005685	1	15	0.199268	0.348125	LUC7L3	http://amigo.geneontology.org/amigo/term/GO:0005685
mitotic spindle organization	Gene Ontology	GO:0007052	1	15	0.199268	0.348125	PTPA	http://amigo.geneontology.org/amigo/term/GO:0007052
nuclear pore	Gene Ontology	GO:0005643	1	15	0.199268	0.348125	NUP214	http://amigo.geneontology.org/amigo/term/GO:0005643
NAD+ ADP-ribosyltransferase activity	Gene Ontology	GO:0003950	1	15	0.199268	0.348125	PARP6	http://amigo.geneontology.org/amigo/term/GO:0003950
connexin complex	Gene Ontology	GO:0005922	1	15	0.199268	0.348125	GJA5	http://amigo.geneontology.org/amigo/term/GO:0005922
phospholipid metabolic process	Gene Ontology	GO:0006644	1	15	0.199268	0.348125	GDPD1	http://amigo.geneontology.org/amigo/term/GO:0006644
cellular response to insulin stimulus	Gene Ontology	GO:0032869	1	15	0.199268	0.348125	PKM	http://amigo.geneontology.org/amigo/term/GO:0032869
smoothened signaling pathway	Gene Ontology	GO:0007224	1	15	0.199268	0.348125	TCTN2	http://amigo.geneontology.org/amigo/term/GO:0007224
positive regulation of autophagy	Gene Ontology	GO:0010508	1	15	0.199268	0.348125	LRRK2	http://amigo.geneontology.org/amigo/term/GO:0010508
mRNA export from nucleus	Gene Ontology	GO:0006406	1	15	0.199268	0.348125	GLE1	http://amigo.geneontology.org/amigo/term/GO:0006406
phosphatidylinositol 3-kinase complex	Gene Ontology	GO:0005942	1	15	0.199268	0.348125	SOCS4	http://amigo.geneontology.org/amigo/term/GO:0005942
DNA-binding transcription activator activity, RNA polymerase II-specific	Gene Ontology	GO:0001228	3	110	0.2049	0.356369	TBX21|ZNF580|TBX15	http://amigo.geneontology.org/amigo/term/GO:0001228
neuron differentiation	Gene Ontology	GO:0030182	2	59	0.205609	0.356369	NEUROD2|LMX1B	http://amigo.geneontology.org/amigo/term/GO:0030182
intrinsic apoptotic signaling pathway in response to DNA damage	Gene Ontology	GO:0008630	1	16	0.210316	0.356369	PRKDC	http://amigo.geneontology.org/amigo/term/GO:0008630
receptor-mediated endocytosis	Gene Ontology	GO:0006898	1	16	0.210316	0.356369	CLTC	http://amigo.geneontology.org/amigo/term/GO:0006898
maturation of SSU-rRNA from tricistronic rRNA transcript (SSU-rRNA, 5.8S rRNA, LSU-rRNA)	Gene Ontology	GO:0000462	1	16	0.210316	0.356369	RRP36	http://amigo.geneontology.org/amigo/term/GO:0000462
cyclin-dependent protein serine/threonine kinase activity	Gene Ontology	GO:0004693	1	16	0.210316	0.356369	CDK9	http://amigo.geneontology.org/amigo/term/GO:0004693
RNA polymerase III complex	Gene Ontology	GO:0005666	1	16	0.210316	0.356369	POLR1C	http://amigo.geneontology.org/amigo/term/GO:0005666
regulation of dopamine secretion	Gene Ontology	GO:0014059	1	16	0.210316	0.356369	SYT6	http://amigo.geneontology.org/amigo/term/GO:0014059
protein N-linked glycosylation	Gene Ontology	GO:0006487	1	16	0.210316	0.356369	DOLPP1	http://amigo.geneontology.org/amigo/term/GO:0006487
nuclear receptor transcription coactivator activity	Gene Ontology	GO:0030374	1	16	0.210316	0.356369	MED1	http://amigo.geneontology.org/amigo/term/GO:0030374
SH3 domain binding	Gene Ontology	GO:0017124	1	16	0.210316	0.356369	ABI3	http://amigo.geneontology.org/amigo/term/GO:0017124
calcium-ion regulated exocytosis	Gene Ontology	GO:0017156	1	16	0.210316	0.356369	SYT6	http://amigo.geneontology.org/amigo/term/GO:0017156
acetylgalactosaminyltransferase activity	Gene Ontology	GO:0008376	1	16	0.210316	0.356369	B3GNT4	http://amigo.geneontology.org/amigo/term/GO:0008376
regulation of cyclin-dependent protein serine/threonine kinase activity	Gene Ontology	GO:0000079	1	17	0.221212	0.366351	CDK5RAP3	http://amigo.geneontology.org/amigo/term/GO:0000079
neuron projection morphogenesis	Gene Ontology	GO:0048812	1	17	0.221212	0.366351	LRRK2	http://amigo.geneontology.org/amigo/term/GO:0048812
RNA polymerase II transcription factor binding	Gene Ontology	GO:0001085	1	17	0.221212	0.366351	MTDH	http://amigo.geneontology.org/amigo/term/GO:0001085
cytoplasmic translation	Gene Ontology	GO:0002181	1	17	0.221212	0.366351	RWDD1	http://amigo.geneontology.org/amigo/term/GO:0002181
histone acetyltransferase complex	Gene Ontology	GO:0000123	1	17	0.221212	0.366351	KAT7	http://amigo.geneontology.org/amigo/term/GO:0000123
glycolytic process	Gene Ontology	GO:0006096	1	17	0.221212	0.366351	PKM	http://amigo.geneontology.org/amigo/term/GO:0006096
histone acetyltransferase activity	Gene Ontology	GO:0004402	1	17	0.221212	0.366351	KAT7	http://amigo.geneontology.org/amigo/term/GO:0004402
regulation of cytokine production	Gene Ontology	GO:0001817	1	17	0.221212	0.366351	VTCN1	http://amigo.geneontology.org/amigo/term/GO:0001817
autophagosome	Gene Ontology	GO:0005776	1	17	0.221212	0.366351	CALCOCO2	http://amigo.geneontology.org/amigo/term/GO:0005776
adenylate cyclase-activating G protein-coupled receptor signaling pathway	Gene Ontology	GO:0007189	2	64	0.230949	0.376482	S1PR2|S1PR5	http://amigo.geneontology.org/amigo/term/GO:0007189
peptidyl-tyrosine dephosphorylation	Gene Ontology	GO:0035335	1	18	0.231958	0.376482	PTPN22	http://amigo.geneontology.org/amigo/term/GO:0035335
mitochondrion organization	Gene Ontology	GO:0007005	1	18	0.231958	0.376482	LRRK2	http://amigo.geneontology.org/amigo/term/GO:0007005
voltage-gated calcium channel activity	Gene Ontology	GO:0005245	1	18	0.231958	0.376482	CACNA2D4	http://amigo.geneontology.org/amigo/term/GO:0005245
DNA-directed 5'-3' RNA polymerase activity	Gene Ontology	GO:0003899	1	18	0.231958	0.376482	POLR1C	http://amigo.geneontology.org/amigo/term/GO:0003899
Rab guanyl-nucleotide exchange factor activity	Gene Ontology	GO:0017112	1	18	0.231958	0.376482	DENND2C	http://amigo.geneontology.org/amigo/term/GO:0017112
GDP binding	Gene Ontology	GO:0019003	1	18	0.231958	0.376482	NRAS	http://amigo.geneontology.org/amigo/term/GO:0019003
basement membrane	Gene Ontology	GO:0005604	1	18	0.231958	0.376482	LAMC3	http://amigo.geneontology.org/amigo/term/GO:0005604
intracellular signal transduction	Gene Ontology	GO:0035556	3	119	0.237363	0.381011	PKN3|BRSK1|DGKE	http://amigo.geneontology.org/amigo/term/GO:0035556
plasma membrane	Gene Ontology	GO:0005886	16	932	0.238847	0.381011	MARCKS|SLC9A1|LRRK2|CDC42EP5|S1PR2|ANO6|NRAS|NOTCH2|STXBP1|RAB3D|S1PR5|ATP6V0A2|EPS8L1|SLC27A4|LANCL2|SYT6	http://amigo.geneontology.org/amigo/term/GO:0005886
histone binding	Gene Ontology	GO:0042393	2	66	0.241144	0.381011	SET|KAT7	http://amigo.geneontology.org/amigo/term/GO:0042393
peptidyl-serine phosphorylation	Gene Ontology	GO:0018105	2	66	0.241144	0.381011	PKN3|TTBK1	http://amigo.geneontology.org/amigo/term/GO:0018105
late endosome	Gene Ontology	GO:0005770	1	19	0.242556	0.381011	MVB12B	http://amigo.geneontology.org/amigo/term/GO:0005770
axonogenesis	Gene Ontology	GO:0007409	1	19	0.242556	0.381011	BRSK1	http://amigo.geneontology.org/amigo/term/GO:0007409
integrin-mediated signaling pathway	Gene Ontology	GO:0007229	1	19	0.242556	0.381011	FGR	http://amigo.geneontology.org/amigo/term/GO:0007229
actin filament bundle assembly	Gene Ontology	GO:0051017	1	19	0.242556	0.381011	AIF1L	http://amigo.geneontology.org/amigo/term/GO:0051017
peptidyl-prolyl cis-trans isomerase activity	Gene Ontology	GO:0003755	1	19	0.242556	0.381011	PTPA	http://amigo.geneontology.org/amigo/term/GO:0003755
cytokine binding	Gene Ontology	GO:0019955	1	19	0.242556	0.381011	TNFRSF9	http://amigo.geneontology.org/amigo/term/GO:0019955
insulin receptor signaling pathway	Gene Ontology	GO:0008286	1	19	0.242556	0.381011	FOXO3	http://amigo.geneontology.org/amigo/term/GO:0008286
regulation of intracellular pH	Gene Ontology	GO:0051453	1	19	0.242556	0.381011	SLC9A1	http://amigo.geneontology.org/amigo/term/GO:0051453
RNA helicase activity	Gene Ontology	GO:0003724	1	20	0.253008	0.392377	DDX43	http://amigo.geneontology.org/amigo/term/GO:0003724
one-carbon metabolic process	Gene Ontology	GO:0006730	1	20	0.253008	0.392377	GNMT	http://amigo.geneontology.org/amigo/term/GO:0006730
cell projection	Gene Ontology	GO:0042995	1	20	0.253008	0.392377	AIF1L	http://amigo.geneontology.org/amigo/term/GO:0042995
activation of cysteine-type endopeptidase activity involved in apoptotic process	Gene Ontology	GO:0006919	1	20	0.253008	0.392377	HIP1R	http://amigo.geneontology.org/amigo/term/GO:0006919
integral component of membrane	Gene Ontology	GO:0016021	4	183	0.258436	0.399947	SLC16A1|VSTM2A|KCND3|KCNS2	http://amigo.geneontology.org/amigo/term/GO:0016021
cellular response to calcium ion	Gene Ontology	GO:0071277	1	21	0.263316	0.405784	SYT6	http://amigo.geneontology.org/amigo/term/GO:0071277
exocytic vesicle	Gene Ontology	GO:0070382	1	21	0.263316	0.405784	SYT6	http://amigo.geneontology.org/amigo/term/GO:0070382
cytosol	Gene Ontology	GO:0005829	10	561	0.265563	0.408387	GNMT|LRRK2|AMPD1|FBXL12|FPGS|SPRY4|PPP2R5D|ACOT7|BICD1|GPHN	http://amigo.geneontology.org/amigo/term/GO:0005829
phosphatase activity	Gene Ontology	GO:0016791	1	22	0.273482	0.417061	ACP6	http://amigo.geneontology.org/amigo/term/GO:0016791
regulation of immune response	Gene Ontology	GO:0050776	1	22	0.273482	0.417061	VTCN1	http://amigo.geneontology.org/amigo/term/GO:0050776
SCF-dependent proteasomal ubiquitin-dependent protein catabolic process	Gene Ontology	GO:0031146	1	22	0.273482	0.417061	FBXL12	http://amigo.geneontology.org/amigo/term/GO:0031146
signal transduction	Gene Ontology	GO:0007165	3	129	0.274355	0.417521	PTPRM|TOM1L1|LRRK2	http://amigo.geneontology.org/amigo/term/GO:0007165
neuron projection development	Gene Ontology	GO:0031175	1	23	0.283509	0.42095	PTPRM	http://amigo.geneontology.org/amigo/term/GO:0031175
phosphatidylinositol binding	Gene Ontology	GO:0035091	1	23	0.283509	0.42095	HIP1R	http://amigo.geneontology.org/amigo/term/GO:0035091
phosphatidylinositol-4,5-bisphosphate binding	Gene Ontology	GO:0005546	1	23	0.283509	0.42095	GRAMD2A	http://amigo.geneontology.org/amigo/term/GO:0005546
positive regulation of canonical Wnt signaling pathway	Gene Ontology	GO:0090263	1	23	0.283509	0.42095	FAM53B	http://amigo.geneontology.org/amigo/term/GO:0090263
Notch signaling pathway	Gene Ontology	GO:0007219	1	23	0.283509	0.42095	NOTCH2	http://amigo.geneontology.org/amigo/term/GO:0007219
mitochondrial outer membrane	Gene Ontology	GO:0005741	1	23	0.283509	0.42095	LRRK2	http://amigo.geneontology.org/amigo/term/GO:0005741
acetylglucosaminyltransferase activity	Gene Ontology	GO:0008375	1	23	0.283509	0.42095	B3GNT4	http://amigo.geneontology.org/amigo/term/GO:0008375
non-membrane spanning protein tyrosine kinase activity	Gene Ontology	GO:0004715	1	23	0.283509	0.42095	FGR	http://amigo.geneontology.org/amigo/term/GO:0004715
peptidyl-tyrosine autophosphorylation	Gene Ontology	GO:0038083	1	23	0.283509	0.42095	FGR	http://amigo.geneontology.org/amigo/term/GO:0038083
recycling endosome	Gene Ontology	GO:0055037	1	24	0.293397	0.426124	FCHSD1	http://amigo.geneontology.org/amigo/term/GO:0055037
nuclear speck	Gene Ontology	GO:0016607	1	24	0.293397	0.426124	U2AF2	http://amigo.geneontology.org/amigo/term/GO:0016607
phosphatidylinositol phosphorylation	Gene Ontology	GO:0046854	1	24	0.293397	0.426124	SOCS4	http://amigo.geneontology.org/amigo/term/GO:0046854
small-subunit processome	Gene Ontology	GO:0032040	1	24	0.293397	0.426124	UTP18	http://amigo.geneontology.org/amigo/term/GO:0032040
phosphatidylserine binding	Gene Ontology	GO:0001786	1	24	0.293397	0.426124	SYT6	http://amigo.geneontology.org/amigo/term/GO:0001786
cell-cell signaling	Gene Ontology	GO:0007267	1	24	0.293397	0.426124	GJA5	http://amigo.geneontology.org/amigo/term/GO:0007267
external side of plasma membrane	Gene Ontology	GO:0009897	3	136	0.300593	0.433992	CD14|VTCN1|TNFRSF9	http://amigo.geneontology.org/amigo/term/GO:0009897
dendrite	Gene Ontology	GO:0030425	2	78	0.302441	0.435131	KCND3|GPHN	http://amigo.geneontology.org/amigo/term/GO:0030425
translation	Gene Ontology	GO:0006412	1	25	0.303149	0.435131	RPS5	http://amigo.geneontology.org/amigo/term/GO:0006412
regulation of cell cycle	Gene Ontology	GO:0051726	1	26	0.312767	0.440279	FBXL12	http://amigo.geneontology.org/amigo/term/GO:0051726
axoneme	Gene Ontology	GO:0005930	1	26	0.312767	0.440279	RSPH9	http://amigo.geneontology.org/amigo/term/GO:0005930
cytoskeleton organization	Gene Ontology	GO:0007010	1	26	0.312767	0.440279	FGD4	http://amigo.geneontology.org/amigo/term/GO:0007010
flavin adenine dinucleotide binding	Gene Ontology	GO:0050660	1	26	0.312767	0.440279	MTO1	http://amigo.geneontology.org/amigo/term/GO:0050660
mitochondrial respiratory chain complex I	Gene Ontology	GO:0005747	1	26	0.312767	0.440279	NDUFA2	http://amigo.geneontology.org/amigo/term/GO:0005747
calcium ion binding	Gene Ontology	GO:0005509	3	141	0.319415	0.443238	AIF1L|SYT6|CASQ2	http://amigo.geneontology.org/amigo/term/GO:0005509
double-stranded DNA binding	Gene Ontology	GO:0003690	1	27	0.322252	0.443238	RAD51AP2	http://amigo.geneontology.org/amigo/term/GO:0003690
chromatin remodeling	Gene Ontology	GO:0006338	1	27	0.322252	0.443238	KDM5A	http://amigo.geneontology.org/amigo/term/GO:0006338
SCF ubiquitin ligase complex	Gene Ontology	GO:0019005	1	27	0.322252	0.443238	FBXL12	http://amigo.geneontology.org/amigo/term/GO:0019005
negative regulation of cell population proliferation	Gene Ontology	GO:0008285	1	27	0.322252	0.443238	KANK2	http://amigo.geneontology.org/amigo/term/GO:0008285
homophilic cell adhesion via plasma membrane adhesion molecules	Gene Ontology	GO:0007156	1	27	0.322252	0.443238	PTPRM	http://amigo.geneontology.org/amigo/term/GO:0007156
translation initiation factor activity	Gene Ontology	GO:0003743	1	27	0.322252	0.443238	EIF2S1	http://amigo.geneontology.org/amigo/term/GO:0003743
phospholipid binding	Gene Ontology	GO:0005543	1	27	0.322252	0.443238	GLE1	http://amigo.geneontology.org/amigo/term/GO:0005543
cell migration	Gene Ontology	GO:0016477	2	82	0.32274	0.443238	LAMC3|NTNG2	http://amigo.geneontology.org/amigo/term/GO:0016477
calcium-mediated signaling	Gene Ontology	GO:0019722	1	28	0.331607	0.449512	LRRK2	http://amigo.geneontology.org/amigo/term/GO:0019722
cell morphogenesis	Gene Ontology	GO:0000902	1	28	0.331607	0.449512	MED1	http://amigo.geneontology.org/amigo/term/GO:0000902
cadherin binding	Gene Ontology	GO:0045296	1	28	0.331607	0.449512	PTPRM	http://amigo.geneontology.org/amigo/term/GO:0045296
actin filament	Gene Ontology	GO:0005884	1	28	0.331607	0.449512	AIF1L	http://amigo.geneontology.org/amigo/term/GO:0005884
ATPase activity	Gene Ontology	GO:0016887	2	84	0.332836	0.450344	TOR1B|KIF2B	http://amigo.geneontology.org/amigo/term/GO:0016887
defense response to Gram-negative bacterium	Gene Ontology	GO:0050829	1	29	0.340833	0.455273	GALP	http://amigo.geneontology.org/amigo/term/GO:0050829
mitochondrial large ribosomal subunit	Gene Ontology	GO:0005762	1	29	0.340833	0.455273	C8H12orf65	http://amigo.geneontology.org/amigo/term/GO:0005762
mitochondrial matrix	Gene Ontology	GO:0005759	1	29	0.340833	0.455273	WARS2	http://amigo.geneontology.org/amigo/term/GO:0005759
secretory granule	Gene Ontology	GO:0030141	1	29	0.340833	0.455273	STXBP1	http://amigo.geneontology.org/amigo/term/GO:0030141
anterior/posterior pattern specification	Gene Ontology	GO:0009952	1	30	0.349932	0.459875	HES2	http://amigo.geneontology.org/amigo/term/GO:0009952
ATPase-coupled transmembrane transporter activity	Gene Ontology	GO:0042626	1	30	0.349932	0.459875	ABCC3	http://amigo.geneontology.org/amigo/term/GO:0042626
regulation of cell migration	Gene Ontology	GO:0030334	1	30	0.349932	0.459875	ABI3	http://amigo.geneontology.org/amigo/term/GO:0030334
G protein-coupled receptor activity	Gene Ontology	GO:0004930	3	150	0.353297	0.463465	SSTR1|S1PR2|S1PR5	http://amigo.geneontology.org/amigo/term/GO:0004930
innate immune response	Gene Ontology	GO:0045087	2	89	0.357873	0.464989	TRIM28|FGR	http://amigo.geneontology.org/amigo/term/GO:0045087
cellular response to DNA damage stimulus	Gene Ontology	GO:0006974	1	31	0.358906	0.464989	PRKDC	http://amigo.geneontology.org/amigo/term/GO:0006974
ubiquitin conjugating enzyme activity	Gene Ontology	GO:0061631	1	31	0.358906	0.464989	UBE2Z	http://amigo.geneontology.org/amigo/term/GO:0061631
transport	Gene Ontology	GO:0006810	1	31	0.358906	0.464989	GPR107	http://amigo.geneontology.org/amigo/term/GO:0006810
Z disc	Gene Ontology	GO:0030018	1	31	0.358906	0.464989	CASQ2	http://amigo.geneontology.org/amigo/term/GO:0030018
ubiquitin-dependent ERAD pathway	Gene Ontology	GO:0030433	1	32	0.367756	0.474774	PSMC6	http://amigo.geneontology.org/amigo/term/GO:0030433
negative regulation of transcription, DNA-templated	Gene Ontology	GO:0045892	2	92	0.372733	0.478667	TRIM28|KAT7	http://amigo.geneontology.org/amigo/term/GO:0045892
single-stranded DNA binding	Gene Ontology	GO:0003697	1	33	0.376484	0.481609	RAD51AP2	http://amigo.geneontology.org/amigo/term/GO:0003697
DNA repair	Gene Ontology	GO:0006281	1	33	0.376484	0.481609	RAD51C	http://amigo.geneontology.org/amigo/term/GO:0006281
dendritic spine	Gene Ontology	GO:0043197	1	34	0.385092	0.485176	KCND3	http://amigo.geneontology.org/amigo/term/GO:0043197
angiogenesis	Gene Ontology	GO:0001525	1	34	0.385092	0.485176	MED1	http://amigo.geneontology.org/amigo/term/GO:0001525
microtubule motor activity	Gene Ontology	GO:0003777	1	34	0.385092	0.485176	KIF2B	http://amigo.geneontology.org/amigo/term/GO:0003777
regulation of cell shape	Gene Ontology	GO:0008360	1	34	0.385092	0.485176	CDC42EP5	http://amigo.geneontology.org/amigo/term/GO:0008360
kinesin complex	Gene Ontology	GO:0005871	1	34	0.385092	0.485176	KIF2B	http://amigo.geneontology.org/amigo/term/GO:0005871
chloride channel activity	Gene Ontology	GO:0005254	1	34	0.385092	0.485176	ANO6	http://amigo.geneontology.org/amigo/term/GO:0005254
endoplasmic reticulum	Gene Ontology	GO:0005783	4	225	0.388458	0.487738	ICMT|TMED2|TMED1|NUS1	http://amigo.geneontology.org/amigo/term/GO:0005783
antimicrobial humoral immune response mediated by antimicrobial peptide	Gene Ontology	GO:0061844	1	35	0.393581	0.493324	GALP	http://amigo.geneontology.org/amigo/term/GO:0061844
cellular response to lipopolysaccharide	Gene Ontology	GO:0071222	1	36	0.401954	0.497851	CD14	http://amigo.geneontology.org/amigo/term/GO:0071222
synaptic vesicle	Gene Ontology	GO:0008021	1	36	0.401954	0.497851	RAB3D	http://amigo.geneontology.org/amigo/term/GO:0008021
calcium-dependent phospholipid binding	Gene Ontology	GO:0005544	1	36	0.401954	0.497851	SYT6	http://amigo.geneontology.org/amigo/term/GO:0005544
chloride transmembrane transport	Gene Ontology	GO:1902476	1	36	0.401954	0.497851	ANO6	http://amigo.geneontology.org/amigo/term/GO:1902476
integral component of endoplasmic reticulum membrane	Gene Ontology	GO:0030176	1	37	0.410211	0.505512	DOLPP1	http://amigo.geneontology.org/amigo/term/GO:0030176
ribonucleoprotein complex	Gene Ontology	GO:1990904	1	37	0.410211	0.505512	ODF1	http://amigo.geneontology.org/amigo/term/GO:1990904
postsynaptic density	Gene Ontology	GO:0014069	1	38	0.418354	0.507853	KCND3	http://amigo.geneontology.org/amigo/term/GO:0014069
neuropeptide signaling pathway	Gene Ontology	GO:0007218	1	38	0.418354	0.507853	SSTR1	http://amigo.geneontology.org/amigo/term/GO:0007218
vesicle	Gene Ontology	GO:0031982	1	38	0.418354	0.507853	RAB3D	http://amigo.geneontology.org/amigo/term/GO:0031982
ciliary basal body	Gene Ontology	GO:0036064	1	38	0.418354	0.507853	CFAP157	http://amigo.geneontology.org/amigo/term/GO:0036064
protein localization to plasma membrane	Gene Ontology	GO:0072659	1	39	0.426385	0.514191	RAB3D	http://amigo.geneontology.org/amigo/term/GO:0072659
actin binding	Gene Ontology	GO:0003779	1	39	0.426385	0.514191	EPS8L1	http://amigo.geneontology.org/amigo/term/GO:0003779
cell-cell junction	Gene Ontology	GO:0005911	1	40	0.434306	0.520314	PTK7	http://amigo.geneontology.org/amigo/term/GO:0005911
regulation of transcription, DNA-templated	Gene Ontology	GO:0006355	2	106	0.44002	0.526299	SNAI2|APBB3	http://amigo.geneontology.org/amigo/term/GO:0006355
protein kinase activity	Gene Ontology	GO:0004672	1	41	0.442118	0.527085	MAP3K6	http://amigo.geneontology.org/amigo/term/GO:0004672
zinc ion binding	Gene Ontology	GO:0008270	1	41	0.442118	0.527085	NPEPPS	http://amigo.geneontology.org/amigo/term/GO:0008270
mitotic cell cycle	Gene Ontology	GO:0000278	1	43	0.457419	0.541798	CLTC	http://amigo.geneontology.org/amigo/term/GO:0000278
positive regulation of gene expression	Gene Ontology	GO:0010628	1	43	0.457419	0.541798	MED1	http://amigo.geneontology.org/amigo/term/GO:0010628
positive regulation of ERK1 and ERK2 cascade	Gene Ontology	GO:0070374	1	44	0.464912	0.547132	PTPN22	http://amigo.geneontology.org/amigo/term/GO:0070374
GTPase activity	Gene Ontology	GO:0003924	2	115	0.48114	0.562658	DNM1L|NRAS	http://amigo.geneontology.org/amigo/term/GO:0003924
centrosome	Gene Ontology	GO:0005813	2	116	0.485594	0.566011	BRSK1|KIF2B	http://amigo.geneontology.org/amigo/term/GO:0005813
adherens junction	Gene Ontology	GO:0005912	1	49	0.500858	0.579191	PTPRM	http://amigo.geneontology.org/amigo/term/GO:0005912
neuronal cell body	Gene Ontology	GO:0043025	1	49	0.500858	0.579191	KCND3	http://amigo.geneontology.org/amigo/term/GO:0043025
DNA-binding transcription repressor activity, RNA polymerase II-specific	Gene Ontology	GO:0001227	1	52	0.521258	0.599938	HES2	http://amigo.geneontology.org/amigo/term/GO:0001227
microtubule-based movement	Gene Ontology	GO:0007018	1	53	0.527871	0.604697	KIF2B	http://amigo.geneontology.org/amigo/term/GO:0007018
regulation of membrane potential	Gene Ontology	GO:0042391	1	55	0.540826	0.616643	LRRK2	http://amigo.geneontology.org/amigo/term/GO:0042391
cytoskeleton	Gene Ontology	GO:0005856	1	59	0.565681	0.640989	CDC42EP5	http://amigo.geneontology.org/amigo/term/GO:0005856
proteolysis	Gene Ontology	GO:0006508	1	61	0.577601	0.646489	NPEPPS	http://amigo.geneontology.org/amigo/term/GO:0006508
signaling receptor activity	Gene Ontology	GO:0038023	1	61	0.577601	0.646489	TNFRSF9	http://amigo.geneontology.org/amigo/term/GO:0038023
Rab GTPase binding	Gene Ontology	GO:0017137	1	65	0.60047	0.661964	TBC1D13	http://amigo.geneontology.org/amigo/term/GO:0017137
lysosome	Gene Ontology	GO:0005764	1	65	0.60047	0.661964	LRRK2	http://amigo.geneontology.org/amigo/term/GO:0005764
axon guidance	Gene Ontology	GO:0007411	1	65	0.60047	0.661964	NOTCH2	http://amigo.geneontology.org/amigo/term/GO:0007411
cilium assembly	Gene Ontology	GO:0060271	1	67	0.611437	0.669016	TCTN2	http://amigo.geneontology.org/amigo/term/GO:0060271
microtubule	Gene Ontology	GO:0005874	1	68	0.616808	0.673885	KIF2B	http://amigo.geneontology.org/amigo/term/GO:0005874
transmembrane receptor protein tyrosine kinase signaling pathway	Gene Ontology	GO:0007169	1	78	0.666602	0.713382	FGR	http://amigo.geneontology.org/amigo/term/GO:0007169
axon	Gene Ontology	GO:0030424	1	79	0.671212	0.717266	LRRK2	http://amigo.geneontology.org/amigo/term/GO:0030424
GTP binding	Gene Ontology	GO:0005525	1	81	0.680242	0.721648	NRAS	http://amigo.geneontology.org/amigo/term/GO:0005525
cell adhesion	Gene Ontology	GO:0007155	1	81	0.680242	0.721648	PCDH1	http://amigo.geneontology.org/amigo/term/GO:0007155
GTPase activator activity	Gene Ontology	GO:0005096	1	88	0.70994	0.748729	TBC1D13	http://amigo.geneontology.org/amigo/term/GO:0005096
extracellular space	Gene Ontology	GO:0005615	8	667	0.715544	0.749325	UTS2|FCN3|PXDNL|EPX|SSC5D|NOG|LPO|ANGPTL6	http://amigo.geneontology.org/amigo/term/GO:0005615
receptor complex	Gene Ontology	GO:0043235	1	91	0.72181	0.753731	NOTCH2	http://amigo.geneontology.org/amigo/term/GO:0043235
inflammatory response	Gene Ontology	GO:0006954	1	93	0.729453	0.759544	CD14	http://amigo.geneontology.org/amigo/term/GO:0006954
extracellular matrix	Gene Ontology	GO:0031012	1	94	0.733196	0.761276	SSC5D	http://amigo.geneontology.org/amigo/term/GO:0031012
chemical synaptic transmission	Gene Ontology	GO:0007268	1	94	0.733196	0.761276	CACNB1	http://amigo.geneontology.org/amigo/term/GO:0007268
regulation of gene expression	Gene Ontology	GO:0010468	1	102	0.761335	0.783822	PRDM12	http://amigo.geneontology.org/amigo/term/GO:0010468
integral component of plasma membrane	Gene Ontology	GO:0005887	5	491	0.816103	0.828554	SLC16A1|PCDH1|SSTR1|CALHM5|CALHM4	http://amigo.geneontology.org/amigo/term/GO:0005887
neuron projection	Gene Ontology	GO:0043005	1	144	0.867122	0.873086	SSTR1	http://amigo.geneontology.org/amigo/term/GO:0043005
ubiquitin protein ligase activity	Gene Ontology	GO:0061630	1	149	0.876078	0.879683	RNF122	http://amigo.geneontology.org/amigo/term/GO:0061630
