# Supplementary material for: Assessment and Distribution of Runs of Homozygosity in Horse Breeds Representing Different Utility Types
Source: Animals (Basel). 2022 Nov 25;12(23):3293. doi: 10.3390/ani12233293 (PMC9736150; doi:10.3390/ani12233293)
Supplement: Supplementary file 1 [file animals-12-03293-s001.zip › Supplementary Table S8.xlsx]

## Sheet: Genes in no ROH regions
SZTUM	SOK	MLP	AR	HC	KP
DYDC1	DYDC1	DYDC1	OR4C5	DYDC1	CCKAR
MAT1A	MAT1A	MAT1A	SYT17	MAT1A	SEL1L3
SFTPA1	SFTPA1	SFTPA1	SMG1	SFTPA1	ADGRE3
EFL1	EFL1	EFL1	ARL6IP1	EFL1	NDUFB7
MEX3B	MEX3B	MEX3B	RPS15A	MEX3B	DNAJB1
TMC3	TMC3	TMC3	RAP1B	TMC3	GIPC1
STARD5	STARD5	STARD5	NUP107	STARD5	PTGER1
MESD	MESD	MESD	SLC35E3	MESD	DDX39A
BNC1	BNC1	CISD1	MDM2	BNC1	ADGRL1
HDGFL3	HDGFL3	UBE2D1	CPSF6	HDGFL3	ASF1B
BTBD1	BTBD1	TFAM	LYZ	BTBD1	eca-mir-8997
HOMER2	HOMER2	BICC1	YEATS4	HOMER2	PRKACA
FSD2	FSD2	PHYHIPL	FRS2	FSD2	C7H19orf67
AP3B2	AP3B2	U6	CCT2	AP3B2	PALM3
C10orf143	SEC11A	MORN4	RAB3IP	SEC11A	eca-mir-1271b
EBF3	NMB	MMS19	MYRFL	NMB	RFX1
SEC11A	WDR73	EXOSC1	ADGRE3	WDR73	PODNL1
NMB	U6	RRP12	NDUFB7	U6	BRME1
WDR73	IQGAP1	FRAT2	DNAJB1	IQGAP1	eca-mir-23a
U6	CRTC3	SLIT1	GIPC1	CRTC3	eca-mir-24-1
IQGAP1	eca-mir-9055	PIK3AP1	PTGER1	eca-mir-9055	CACNA1A
CRTC3	BLM	TM9SF3	DDX39A	BLM	STX10
eca-mir-9055	FURIN	TLL2	ADGRL1	FURIN	TRMT1
BLM	FES	OPALIN	ASF1B	FES	LYL1
FURIN	MAN2A2	BLNK	eca-mir-8997	MAN2A2	GADD45GIP1
FES	UNC45A	TCTN3	PRKACA	UNC45A	FARSA
MAN2A2	RCCD1	ALDH18A1	C7H19orf67	RCCD1	KLF1
UNC45A	CIB1	SORBS1	PALM3	CIB1	DNASE2
RCCD1	IDH2	CDK1	eca-mir-1271b	IDH2	RTBDN
CIB1	AP3S2	CABCOCO1	RFX1	AP3S2	PRDX2
IDH2	MESP1	ARID5B	PODNL1	MESP1	HOOK2
AP3S2	PEX11A	ZNF365	BRME1	PEX11A	TRIR
MESP1	PLIN1	ADO	eca-mir-23a	PLIN1	TNPO2
PEX11A	KIF7	NRBF2	eca-mir-24-1	KIF7	FBXW9
PLIN1	RHCG	REEP3	CACNA1A	HDAC11	DHPS
KIF7	POLG	ZMIZ1	STX10	FBLN2	WDR83OS
RHCG	RLBP1	GDF10	TRMT1	TMEM43
POLG	DET1	GDF2	LYL1	LSM3
RLBP1	MRPL46	RBP3	GADD45GIP1	SLC6A6
DET1	NTRK3	MMRN2	FARSA	CCDC174
MRPL46	LRIT1	WAPL	KLF1	C16H3orf20
NTRK3	LRIT2	GRID1	DNASE2	FGD5
KLHL25	CD300E	LRIT1	RTBDN	NR2C2
SV2B	CD300H	LRIT2		TMCC1
U2	CD300LB	OR4C5		PLXND1
SLCO3A1	eca-mir-9097	NUPR1		MBD4
ST8SIA2	BTBD17	IL27		EFCAB12
eca-mir-9050	SDK2	CLN3		RPL32
MCTP2	CDC42EP4	ATXN2L		TMEM40
ATAD1	CPSF4L	SH2B1		RAF1
SGMS1	FAM104A	ATP2A1		MKRN2OS
ITPRIP	SLC39A11	CD19		TIMP4
CFAP43	ADAM17	NFATC2IP		TAMM41
CISD1	ITGB1BP1	SPNS1		VGLL4
UBE2D1	MBOAT2	eca-mir-9130		ADGRE3
COL17A1	KIDINS220	LAT		NDUFB7
STN1	CMPK2	XPO6		DNAJB1
TFAM	ZBTB20	GSG1L		GIPC1
SH3PXD2A	ZNF80	eca-mir-9129		PTGER1
CALHM3	DRD3	GTF3C1		DDX39A
CALHM1	CCDC191	NSMCE1		ADGRL1
CALHM2	NAA50	LCMT1		ASF1B
eca-mir-1307	USF3	AQP8		eca-mir-8997
ATP5MK	SPICE1	eca-mir-8930		PRKACA
PCGF6	CFAP44	ARHGAP17		C7H19orf67
BICC1	KRTAP15-1	ERN2		PALM3
NT5C2	KRTAP20-1	PALB2		eca-mir-1271b
CYP17A1	SOD1	NDUFAB1		RFX1
ARL3	HUNK	EARS2		PODNL1
PHYHIPL	MRAP	GGA2		BRME1
CDK1	EVA1C	COG7		eca-mir-23a
CABCOCO1	OLIG2	USP31		eca-mir-24-1
ARID5B	OLIG1	IGSF6		CACNA1A
ZNF365	IFNAR2	ACSM4		STX10
ADO	IL10RB	ACSM3		TRMT1
NRBF2	IFNAR1	REXO5		LYL1
REEP3	IFNGR2	LYRM1		GADD45GIP1
LRRTM3	SON	TMEM159		FARSA
SIRT1	ITSN1	ANKS4B		KLF1
MYPN	FZD8	UQCRC2		DNASE2
HNRNPH3	CUL2	VWA3A		RTBDN
TET1	PARD3	SDR42E2
Metazoa_SRP	CCKAR	EEF2K
CCAR1	SEL1L3	POLR3E
STOX1	SEPSECS	eca-mir-9135
DDX50	LGI2	UMOD
DDX21	CCDC149	GP2
KIFBP	DHX15	GPR139
SRGN	PPARGC1A	GPRC5B
SUPV3L1	GPATCH2	KNOP1
HKDC1	ESRRG	GDE1
HK1	USH2A	TMC7
TSPAN15	OR6F1	COQ7
FAM241B	PDCD2	ITPRIPL2
COL13A1	PSMB1	SYT17
MACROH2A2	DLL1	SMG1
EIF4EBP2	PHF10	ARL6IP1
PALD1	WDR27	RPS15A
ADAMTS14	THBS2	CMPK2
SGPL1	DACT2	FANCL
Y_RNA	FRMD1	RNASEH1
HEATR1	FRS2	EIPR1
ERO1B	CCT2	MYT1L
NID1	RAB3IP	PXDN
LYST	MYRFL	TMEM18
GNG4	ADGRE3	ALKAL2
B3GALNT2	NDUFB7	SH3YL1
ARID4B	DNAJB1	FAM110C
RBM34	GIPC1	TMCC1
TOMM20	PTGER1	PLXND1
IRF2BP2	DDX39A	MBD4
TARBP1	ADGRL1	EFCAB12
PCNX2	ASF1B	RPL32
SIPA1L2	eca-mir-8997	SRGAP3
EGLN1	PRKACA	RAD18
EXOC8	C7H19orf67	OXTR
C1H1orf131	PALM3	SSUH2
FAM89A	eca-mir-1271b	NR2C2
TTC13	RFX1	KCNAB1
C1H1orf198	PODNL1	TIPARP
ALOX5	BRME1	LEKR1
MSMB	eca-mir-23a	TRABD2B
NCOA4	eca-mir-24-1	STIL
PARG	CACNA1A	TAL1
OGDHL	STX10	PDZK1IP1
ERCC6	TRMT1	CYP4X1
DRGX	LYL1	EFCAB14
FAM170B	GADD45GIP1	ATPAF1
VSTM4	FARSA	MOB3C
LRRC18	KLF1	MKNK1
ARHGAP22	DNASE2	KNCN
FRMPD2	RTBDN	TMEM275
PTPN20	PRDX2	ALDH4A1
GDF10	HOOK2	RCC2
GDF2	TRIR	PADI2
RBP3	TNPO2	SDHB
MMRN2	FBXW9	RIMS3
WAPL	DHPS	COL9A2
GRID1	WDR83OS	PPT1
LRIT1	MMP16	MYCL
LRIT2	CNGB3	SNORA70
NT5DC1	RMDN1	TRIT1
RSPO3	SLC7A13	U2
RNF146	PSKH2	HPCAL4
LAMA2	CA1	NT5C1A
L3MBTL3	RBIS	HEYL
TMEM200A	CA8	PABPC4
SMLR1	TOX	RHBDL2
AKAP7		GJA9
ARG1		RRAGC
ENPP3		ADAMTSL1
GLOD4		RRAGA
GEMIN4		DENND4C
VPS53		SOD1
RFLNB		HUNK
NPTX1		PARVB
SGSH		PARVG
EIF4A3		PRR5
TBC1D16		ADARB2
CBX4		IDI1
ARHGAP44		LARP4B
COX10		DIP2C
HS3ST3B1		FZD8
OR8I2		CUL2
OR8J2		PARD3
OR4C5		ORC6
HIP1		GPT2
FKBP6		PHKB
VPS37D		LONP2
BUD23		C3H16orf78
CLDN4		RELL1
TMEM270		eca-mir-1261
LIMK1		ARAP2
EIF4H		WFS1
eca-mir-590		S100P
LAT2		BLOC1S4
BCL7C		KIAA0232
ZNF629		TBC1D14
CCDC189		TADA2B
ZNF689		eca-mir-9071
ZNF688		SORCS2
ZNF768		SNORD29
DCTPP1		LRP11
SEPTIN1		NUP43
TBC1D10B		LATS1
CD2BP2		KATNA1
QPRT		PPIL4
ZG16		ZC3H12D
KIF22		SHPRH
MAZ		FBXO30
PAGR1		EPM2A
MVP		SF3B5
ASPHD1		PLAGL1
TMEM219		FUCA2
TAOK2		ADAT2
INO80E		HIVEP2
ALDOA		NMBR
PPP4C		PIK3C2G
CORO1A		PLEKHA5
NUPR1		AEBP2
IL27		OR56B1
CLN3		OR52N4
ATXN2L		OR56A3
SH2B1		OR52W1
ATP2A1		C7H11orf42
CD19		CNGA4
NFATC2IP		CCKBR
FAM20C		SMPD1
FOXL3		TIMM10B
SPNS1		DNHD1
eca-mir-9130		ILK
LAT		OR2AG1
XPO6		OR10A4
GSG1L		ZNF215
eca-mir-9129		NLRP14
GTF3C1		OLFML1
NSMCE1		PPFIBP2
LCMT1		CTIF
AQP8		BRAP
eca-mir-8930		ATXN2
ARHGAP17		TBX3
ERN2		TBX5
PALB2		RBM19
NDUFAB1		LHX5
EARS2		SDS
GGA2		SLC8B1
COG7		IQCD
USP31		DDX54
IGSF6		RASAL1
ACSM4		RPL6
ACSM3		HECTD4
REXO5		NAA25
LYRM1		TMEM116
TMEM159		DEPTOR
ANKS4B		COL14A1
UQCRC2		MTBP
VWA3A
SDR42E2
EEF2K
POLR3E
eca-mir-9135
UMOD
GP2
GPR139
GPRC5B
KNOP1
DRD1
PROK2
EIF4E3
FOXP1
MDFIC2
FRMD4B
LMOD3
UBA3
TMF1
EOGT
TAFA4
IMP4
PTPN18
AMER3
LIMS2
eca-mir-8932-1
MAP3K2
HES1
SSBP3
CYB5RL
CDCP2
TMEM59
LDLRAD1
HSPB11
YIPF1
NDC1
GLIS1
LRP8
MAGOH
CZIB
SLC1A7
ECHDC2
TRAM1L1
NDST4
ADGRB3
ENTPD6
PYGB
GINS1
ACSS1
APMAP
CST3
CST9L
CST11
NAPB
CD93
THBD
CTNNBL1
VSTM2L
RPRD1B
BPI
LBP
SNORA71
RALGAPB
ADIG
ARHGAP40
SLC32A1
ACTR5
PPP1R16B
FAM83D
DHX35
IFNK
GLRX5
TUNAR
C14orf132
BDKRB2
BDKRB1
GSKIP
AK7
PAPOLA
VRK1
MUSK
KRTAP15-1
KRTAP20-1
ROBO1
CHODL
N6AMT1
eca-mir-9027
USP16
MAP3K7CL
BACH1
FZD8
CUL2
PARD3
USP6NL
RBM47
PDS5A
SMIM14
UGDH
RPL9
RFC1
TMEM156
TLR6
TLR1
TLR10
RELL1
eca-mir-1261
ARAP2
CCKAR
SEL1L3
SEPSECS
LGI2
CCDC149
DHX15
PPARGC1A
ADGRA3
KCNIP4
DACT2
FRMD1
UNC93A
GPR31
RPS6KA2
MPC1
SFT2D1
TBXT
PDE10A
C31H6orf118
DYNLT1
SERAC1
ABCA13
VWC2
SPATA48
IKZF1
SELENOF
ODF2L
COL24A1
ZNHIT6
NTF3
ADGRE3
NDUFB7
DNAJB1
GIPC1
PTGER1
DDX39A
ADGRL1
ASF1B
eca-mir-8997
PRKACA
C7H19orf67
PALM3
eca-mir-1271b
RFX1
PODNL1
BRME1
eca-mir-23a
eca-mir-24-1
CACNA1A
STX10
TRMT1
LYL1
GADD45GIP1
FARSA
KLF1
DNASE2
RTBDN
PRDX2
HOOK2
TRIR
TNPO2
FBXW9
DHPS
WDR83OS
SMPD4
KLHL22
SCARF2
eca-mir-9008
GNAZ
RAB36
BCR
ADORA2A
UPB1
SNRPD3
GGT5
VPREB3
ZNF70
THAP7
PI4KA
CCDC116
SDF2L1
eca-mir-301b
eca-mir-130b
eca-mir-9003
DCC
POLI
CYP7B1
GGH

## Sheet: Common genes in no ROH regions
Names	total	elements
AR HC KP SOK SZTUM	27	PODNL1 KLF1 TRMT1 DNAJB1 NDUFB7 DNASE2 ADGRE3 eca-mir-8997 CACNA1A PALM3 ASF1B GADD45GIP1 FARSA eca-mir-24-1 LYL1 PTGER1 STX10 ADGRL1 DDX39A RTBDN RFX1 BRME1 C7H19orf67 PRKACA GIPC1 eca-mir-23a eca-mir-1271b
HC MLP SOK SZTUM	9	MEX3B EFL1 STARD5 U6 TMC3 MAT1A DYDC1 MESD SFTPA1
MLP SOK SZTUM	5	LRIT1 FZD8 LRIT2 CUL2 PARD3
HC SOK SZTUM	25	NMB KIF7 FSD2 RCCD1 AP3S2 HOMER2 MAN2A2 IQGAP1 BTBD1 IDH2 MESP1 FES SEC11A CRTC3 FURIN CIB1 HDGFL3 BLM PEX11A eca-mir-9055 UNC45A AP3B2 WDR73 BNC1 PLIN1
KP SOK SZTUM	9	SEL1L3 DHPS TRIR HOOK2 CCKAR PRDX2 FBXW9 WDR83OS TNPO2
AR MLP SZTUM	1	OR4C5
SOK SZTUM	15	CCDC149 DACT2 RLBP1 FRMD1 SEPSECS LGI2 MRPL46 KRTAP20-1 POLG DHX15 DET1 PPARGC1A KRTAP15-1 RHCG NTRK3
MLP SZTUM	67	GSG1L eca-mir-9130 NDUFAB1 MMRN2 ANKS4B TFAM ZNF365 XPO6 eca-mir-1261 ARHGAP17 LYRM1 ACSM3 USP31 PALB2 TMEM159 REEP3 CDK1 ACSM4 GDF10 LAT LCMT1 PHYHIPL ARAP2 CD19 ARID5B BICC1 NUPR1 CABCOCO1 NSMCE1 NFATC2IP WAPL eca-mir-8930 ATP2A1 EARS2 ERN2 GDF2 REXO5 UMOD AQP8 RELL1 SDR42E2 SH2B1 CISD1 ADO RBP3 eca-mir-9129 IGSF6 GPRC5B POLR3E GTF3C1 NRBF2 GPR139 EEF2K eca-mir-9135 VWA3A GP2 SPNS1 ATXN2L KNOP1…
MLP SOK	3	CMPK2 SOD1 HUNK
AR SOK	4	RAB3IP FRS2 CCT2 MYRFL
AR MLP	4	ARL6IP1 RPS15A SYT17 SMG1
HC MLP	6	TMCC1 RPL32 NR2C2 MBD4 EFCAB12 PLXND1
SZTUM	273	eca-mir-9008 GSKIP CCDC116 SUPV3L1 EIF4EBP2 GLIS1 STOX1 eca-mir-1307 GGH NT5DC1 LAMA2 ACSS1 TOMM20 NID1 DHX35 IMP4 ZG16 STN1 RBM34 PTPN18 TSPAN15 CTNNBL1 POLI CD2BP2 PAPOLA AK7 IRF2BP2 MUSK RALGAPB CDCP2 VSTM2L ALOX5 OR8J2 ENTPD6 SSBP3 TUNAR SMPD4 ADGRB3 HS3ST3B1 AKAP7 LIMS2 CBX4 GINS1 CLDN4 UGDH USP6NL TLR1 TLR10 PYGB HES1 PROK2 eca-mir-8932-1 Metazoa_SRP SEPTIN1 GNAZ SLC1A7 C1H1orf198 CALHM1 TB…
SOK	51	OR6F1 SLC7A13 ITGB1BP1 CPSF4L KIDINS220 CCDC191 USF3 MRAP RMDN1 BTBD17 MMP16 CD300H DRD3 SON CNGB3 SPICE1 CD300LB THBS2 eca-mir-9097 WDR27 GPATCH2 DLL1 ZBTB20 ESRRG ZNF80 CA8 CDC42EP4 ITSN1 CFAP44 PSKH2 ADAM17 SLC39A11 NAA50 IFNGR2 IFNAR1 USH2A TOX OLIG1 PSMB1 SDK2 IFNAR2 PHF10 RBIS CD300E CA1 EVA1C IL10RB OLIG2 FAM104A MBOAT2 PDCD2
MLP	141	MMS19 SDS NMBR PARVG BLNK PDZK1IP1 TBC1D14 S100P OR56A3 BRAP SDHB CYP4X1 EXOSC1 C7H11orf42 DIP2C TMEM18 COL9A2 HIVEP2 MOB3C TBX5 SH3YL1 COQ7 SORBS1 MKNK1 STIL PPIL4 ZC3H12D CTIF ALDH18A1 ADAT2 MYT1L RASAL1 OR52W1 ALDH4A1 TIPARP SLC8B1 LATS1 PABPC4 PXDN FANCL IDI1 FAM110C KATNA1 COL14A1 C3H16orf78 RAD18 FUCA2 TAL1 PIK3AP1 ATPAF1 OXTR CNGA4 TBX3 EPM2A OR56B1 AEBP2 TMEM116 LHX5 ALKAL2 ITPRIPL2 RBM19…
AR	7	YEATS4 RAP1B MDM2 CPSF6 NUP107 LYZ SLC35E3
HC	14	CCDC174 MKRN2OS TMEM43 SLC6A6 FBLN2 C16H3orf20 HDAC11 FGD5 TAMM41 LSM3 RAF1 TIMP4 TMEM40 VGLL4

## Sheet: Gene ontology
#Term	Database	ID	Input number	Background number	P-Value	Corrected P-Value	Input	Hyperlink
nucleus	Gene Ontology	GO:0005634	73	1897	2.03794e-07	0.000179543	PARG|PHF10|MKNK1|PDS5A|EPM2A|ERCC6|UBE2D1|TBX3|KATNA1|REXO5|TBX5|VRK1|ARID4B|ZC3H12D|ZNF70|TNPO2|HEYL|MYCL|SMG1|ZNF629|MBD4|TAL1|TADA2B|PPARGC1A|STN1|IRF2BP2|TET1|ZNF768|KLF1|TRMT1|FANCL|PDCD2|PPIL4|NSMCE1|MVP|SIRT1|GLIS1|RRAGA|ZNHIT6|RRAGC|UGDH|CST11|ZNF80|EGLN1|BLM|PADI2|EBF3|UBA3|ADIG|MDM2|OLIG2|LHX5|RAD18|NR2C2|PABPC4|PTPN18|ARID5B|NUPR1|PCGF6|THAP7|RBM47|RFX1|CDK1|L3MBTL3|MYRFL|PRKACA|RFC1|L…	http://amigo.geneontology.org/amigo/term/GO:0005634
extracellular matrix structural constituent	Gene Ontology	GO:0005201	6	33	0.000110884	0.0325628	LAMA2|UMOD|COL9A2|COL13A1|COL24A1|GP2	http://amigo.geneontology.org/amigo/term/GO:0005201
RNA binding	Gene Ontology	GO:0003723	13	193	0.000259878	0.0531074	ATXN2L|DDX21|SNRPD3|DDX39A|DDX50|RBM47|PABPC4|SON|HNRNPH3|DHX15|LSM3|ATXN2|DHX35	http://amigo.geneontology.org/amigo/term/GO:0003723
RNA polymerase II transcription regulatory region sequence-specific DNA binding	Gene Ontology	GO:0000977	11	147	0.000331435	0.0531074	HEYL|GLIS1|LYL1|LHX5|TAL1|ZNF80|BNC1|NR2C2|TBX3|TBX5|HES1	http://amigo.geneontology.org/amigo/term/GO:0000977
lysosome	Gene Ontology	GO:0005764	7	65	0.000562731	0.0702964	RRAGA|RRAGC|PPT1|CLN3|TMEM59|SMPD1|FUCA2	http://amigo.geneontology.org/amigo/term/GO:0005764
regulation of transcription by RNA polymerase II	Gene Ontology	GO:0006357	20	424	0.000638333	0.0702964	NR2C2|TFAM|ZNF629|PCGF6|TAL1|OLIG2|TADA2B|ZNF80|RFX1|IRF2BP2|LHX5|MDM2|ZBTB20|LYL1|ARID4B|PLAGL1|IKZF1|BACH1|BNC1|ARID5B	http://amigo.geneontology.org/amigo/term/GO:0006357
integral component of membrane	Gene Ontology	GO:0016021	11	183	0.00179719	0.120385	VSTM2L|IL10RB|FZD8|SORCS2|ARL6IP1|IFNAR2|STX10|IFNAR1|IFNGR2|SV2B|MCTP2	http://amigo.geneontology.org/amigo/term/GO:0016021
5'-nucleotidase activity	Gene Ontology	GO:0008253	3	10	0.00191304	0.120385	NT5C2|NT5C1A|NT5DC1	http://amigo.geneontology.org/amigo/term/GO:0008253
cytoplasmic stress granule	Gene Ontology	GO:0010494	3	11	0.0023991	0.140907	ATXN2L|PABPC4|ATXN2	http://amigo.geneontology.org/amigo/term/GO:0010494
GTPase activator activity	Gene Ontology	GO:0005096	7	88	0.00286001	0.148216	ARHGAP44|ARHGAP40|ARHGAP17|RALGAPB|ARHGAP22|USP6NL|TBC1D16	http://amigo.geneontology.org/amigo/term/GO:0005096
cytokine receptor activity	Gene Ontology	GO:0004896	4	27	0.00314898	0.14906	IFNAR2|IFNAR1|IFNGR2|IL10RB	http://amigo.geneontology.org/amigo/term/GO:0004896
defense response to Gram-negative bacterium	Gene Ontology	GO:0050829	4	29	0.0039695	0.16653	BPI|LBP|LYZ|CST11	http://amigo.geneontology.org/amigo/term/GO:0050829
precatalytic spliceosome	Gene Ontology	GO:0071011	3	14	0.00428809	0.168837	SF3B5|SNRPD3|LSM3	http://amigo.geneontology.org/amigo/term/GO:0071011
G protein-coupled receptor activity	Gene Ontology	GO:0004930	9	150	0.00459943	0.168837	BDKRB1|BDKRB2|CCKAR|OXTR|DRD3|DRD1|NMBR|ADGRL1|ADGRB3	http://amigo.geneontology.org/amigo/term/GO:0004930
cytoplasm	Gene Ontology	GO:0005737	46	1525	0.00567772	0.180208	PARG|KLHL25|PI4KA|IDI1|ARL3|MKNK1|PABPC4|S100P|SRGAP3|PRDX2|LIMS2|FKBP6|TBX5|EXOSC1|KNCN|ARHGAP40|NAA25|ITSN1|CMPK2|PARVB|MVP|TNPO2|SIRT1|DHPS|VRK1|HOOK2|CST11|CDC42EP4|BLM|PTPN18|PADI2|PIK3C2G|UBA3|ADIG|EPM2A|TAOK2|EGLN1|PARD3|ARG1|CA1|AK7|FRAT2|ACTR5|RNF146|PSMB1|PALD1	http://amigo.geneontology.org/amigo/term/GO:0005737
ceramide biosynthetic process	Gene Ontology	GO:0046513	3	16	0.00593359	0.180208	SMPD4|SMPD1|SGMS1	http://amigo.geneontology.org/amigo/term/GO:0046513
cytosol	Gene Ontology	GO:0005829	21	561	0.00667379	0.180208	LCMT1|AKAP7|ALDOA|ARHGAP17|HKDC1|ARG1|DNAJB1|HK1|PABPC4|MAT1A|PRDX2|EFL1|UGDH|FKBP6|DCTPP1|NT5C1A|PLEKHA5|CTIF|LYST|PIK3AP1|RAF1	http://amigo.geneontology.org/amigo/term/GO:0005829
glycolytic process	Gene Ontology	GO:0006096	3	17	0.00687904	0.180208	HKDC1|ALDOA|HK1	http://amigo.geneontology.org/amigo/term/GO:0006096
integral component of plasma membrane	Gene Ontology	GO:0005887	19	491	0.0069474	0.180208	MUSK|CCKAR|CALHM1|CALHM3|CALHM2|RHCG|OXTR|TLR1|DRD3|NTRK3|SLCO3A1|NMBR|SGMS1|ADGRL1|PLXND1|TRABD2B|DRD1|TSPAN15|ADGRB3	http://amigo.geneontology.org/amigo/term/GO:0005887
nucleolus	Gene Ontology	GO:0005730	7	105	0.00704595	0.180208	DDX21|IMP4|DDX50|DDX54|RRP12|BUD23|MDM2	http://amigo.geneontology.org/amigo/term/GO:0005730
postreplication repair	Gene Ontology	GO:0006301	2	5	0.00771684	0.180208	RAD18|NSMCE1	http://amigo.geneontology.org/amigo/term/GO:0006301
protein monoubiquitination	Gene Ontology	GO:0006513	2	5	0.00771684	0.180208	RAD18|FANCL	http://amigo.geneontology.org/amigo/term/GO:0006513
respiratory electron transport chain	Gene Ontology	GO:0022904	2	5	0.00771684	0.180208	SDHB|PPARGC1A	http://amigo.geneontology.org/amigo/term/GO:0022904
Rac GTPase binding	Gene Ontology	GO:0048365	3	18	0.00790879	0.180208	ARHGAP44|SRGAP3|ARHGAP17	http://amigo.geneontology.org/amigo/term/GO:0048365
membrane	Gene Ontology	GO:0016020	12	259	0.00831154	0.180208	SLC39A11|SLC8B1|PI4KA|MBOAT2|PIK3C2G|BCR|TM9SF3|REEP3|LYST|TRABD2B|TMEM43|FURIN	http://amigo.geneontology.org/amigo/term/GO:0016020
DNA-binding transcription activator activity, RNA polymerase II-specific	Gene Ontology	GO:0001228	7	110	0.00887107	0.180208	MYCL|ZNF629|TBX3|EBF3|TBX5|MDM2|PLAGL1	http://amigo.geneontology.org/amigo/term/GO:0001228
extracellular matrix organization	Gene Ontology	GO:0030198	5	60	0.00937542	0.180208	COL24A1|COL13A1|COL9A2|ADAMTSL1|ADAMTS14	http://amigo.geneontology.org/amigo/term/GO:0030198
catalytic step 2 spliceosome	Gene Ontology	GO:0071013	4	38	0.00944186	0.180208	MAGOH|SNRPD3|DHX35|LSM3	http://amigo.geneontology.org/amigo/term/GO:0071013
endothelial cell migration	Gene Ontology	GO:0043542	2	6	0.0101547	0.180208	PLXND1|S100P	http://amigo.geneontology.org/amigo/term/GO:0043542
lipopolysaccharide-mediated signaling pathway	Gene Ontology	GO:0031663	2	6	0.0101547	0.180208	BPI|LBP	http://amigo.geneontology.org/amigo/term/GO:0031663
retina layer formation	Gene Ontology	GO:0010842	2	6	0.0101547	0.180208	SDK2|MYPN	http://amigo.geneontology.org/amigo/term/GO:0010842
synapse assembly	Gene Ontology	GO:0007416	2	6	0.0101547	0.180208	SDK2|MYPN	http://amigo.geneontology.org/amigo/term/GO:0007416
Hsp90 protein binding	Gene Ontology	GO:0051879	2	6	0.0101547	0.180208	FKBP6|UNC45A	http://amigo.geneontology.org/amigo/term/GO:0051879
SMN-Sm protein complex	Gene Ontology	GO:0034719	2	6	0.0101547	0.180208	SNRPD3|GEMIN4	http://amigo.geneontology.org/amigo/term/GO:0034719
RNA helicase activity	Gene Ontology	GO:0003724	3	20	0.0102275	0.180208	DDX50|DDX21|DDX39A	http://amigo.geneontology.org/amigo/term/GO:0003724
intracellular anatomical structure	Gene Ontology	GO:0005622	4	41	0.011999	0.200549	ARHGAP44|DHX35|ARHGAP17|DHX15	http://amigo.geneontology.org/amigo/term/GO:0005622
mitochondrion	Gene Ontology	GO:0005739	14	342	0.0123077	0.200549	NDUFAB1|ATPAF1|HKDC1|IDH2|CMPK2|HK1|TRIT1|RAF1|GLRX5|COX10|ALDH18A1|OGDHL|UQCRC2|ECHDC2	http://amigo.geneontology.org/amigo/term/GO:0005739
glucose 6-phosphate metabolic process	Gene Ontology	GO:0051156	2	7	0.0128857	0.200549	HKDC1|HK1	http://amigo.geneontology.org/amigo/term/GO:0051156
vacuole	Gene Ontology	GO:0005773	2	7	0.0128857	0.200549	CLN3|GGH	http://amigo.geneontology.org/amigo/term/GO:0005773
presynaptic membrane	Gene Ontology	GO:0042734	3	22	0.0129002	0.200549	ITSN1|ADGRL1|RIMS3	http://amigo.geneontology.org/amigo/term/GO:0042734
apical plasma membrane	Gene Ontology	GO:0016324	4	42	0.0129404	0.200549	KNCN|UMOD|GP2|PARD3	http://amigo.geneontology.org/amigo/term/GO:0016324
phosphatidylinositol binding	Gene Ontology	GO:0035091	3	23	0.0143719	0.200549	SH3YL1|PARD3|HIP1	http://amigo.geneontology.org/amigo/term/GO:0035091
regulation of actin cytoskeleton organization	Gene Ontology	GO:0032956	3	23	0.0143719	0.200549	ARHGAP44|ARHGAP40|ARHGAP17	http://amigo.geneontology.org/amigo/term/GO:0032956
Notch signaling pathway	Gene Ontology	GO:0007219	3	23	0.0143719	0.200549	HES1|ADAM17|DLL1	http://amigo.geneontology.org/amigo/term/GO:0007219
cation channel activity	Gene Ontology	GO:0005261	3	23	0.0143719	0.200549	CALHM1|CALHM3|CALHM2	http://amigo.geneontology.org/amigo/term/GO:0005261
extracellular matrix	Gene Ontology	GO:0031012	6	94	0.0147406	0.200549	TIMP4|COL9A2|COL13A1|ADAMTSL1|COL24A1|ADAMTS14	http://amigo.geneontology.org/amigo/term/GO:0031012
activation of GTPase activity	Gene Ontology	GO:0090630	4	44	0.0149616	0.200549	RALGAPB|ARHGAP22|USP6NL|TBC1D16	http://amigo.geneontology.org/amigo/term/GO:0090630
phosphatidylinositol-3,5-bisphosphate binding	Gene Ontology	GO:0080025	2	8	0.0158973	0.200549	PLEKHA5|HIP1	http://amigo.geneontology.org/amigo/term/GO:0080025
rough endoplasmic reticulum	Gene Ontology	GO:0005791	2	8	0.0158973	0.200549	SFTPA1|TRAM1L1	http://amigo.geneontology.org/amigo/term/GO:0005791
Ino80 complex	Gene Ontology	GO:0031011	2	8	0.0158973	0.200549	ACTR5|INO80E	http://amigo.geneontology.org/amigo/term/GO:0031011
positive regulation of TOR signaling	Gene Ontology	GO:0032008	2	8	0.0158973	0.200549	RRAGA|RRAGC	http://amigo.geneontology.org/amigo/term/GO:0032008
heparin binding	Gene Ontology	GO:0008201	3	24	0.0159346	0.200549	EVA1C|COL13A1|SLIT1	http://amigo.geneontology.org/amigo/term/GO:0008201
RNA phosphodiester bond hydrolysis, endonucleolytic	Gene Ontology	GO:0090502	2	9	0.0191774	0.218292	RNASEH1|ZC3H12D	http://amigo.geneontology.org/amigo/term/GO:0090502
U5 snRNP	Gene Ontology	GO:0005682	2	9	0.0191774	0.218292	CD2BP2|SNRPD3	http://amigo.geneontology.org/amigo/term/GO:0005682
nucleoside diphosphate kinase activity	Gene Ontology	GO:0004550	2	9	0.0191774	0.218292	CMPK2|AK7	http://amigo.geneontology.org/amigo/term/GO:0004550
lipopolysaccharide binding	Gene Ontology	GO:0001530	2	9	0.0191774	0.218292	BPI|LBP	http://amigo.geneontology.org/amigo/term/GO:0001530
phosphatidylinositol kinase activity	Gene Ontology	GO:0052742	2	9	0.0191774	0.218292	PIK3C2G|PI4KA	http://amigo.geneontology.org/amigo/term/GO:0052742
metalloendopeptidase activity	Gene Ontology	GO:0004222	4	48	0.0195744	0.218292	TRABD2B|ADAMTSL1|ADAMTS14|ADAM17	http://amigo.geneontology.org/amigo/term/GO:0004222
homophilic cell adhesion via plasma membrane adhesion molecules	Gene Ontology	GO:0007156	3	27	0.0211745	0.230014	ROBO1|SDK2|MYPN	http://amigo.geneontology.org/amigo/term/GO:0007156
TORC2 complex	Gene Ontology	GO:0031932	2	10	0.0227142	0.230014	SMG1|PRR5	http://amigo.geneontology.org/amigo/term/GO:0031932
mechanosensitive ion channel activity	Gene Ontology	GO:0008381	2	10	0.0227142	0.230014	TMC7|TMC3	http://amigo.geneontology.org/amigo/term/GO:0008381
cellular response to starvation	Gene Ontology	GO:0009267	2	10	0.0227142	0.230014	RRAGA|RRAGC	http://amigo.geneontology.org/amigo/term/GO:0009267
protein kinase A regulatory subunit binding	Gene Ontology	GO:0034237	2	10	0.0227142	0.230014	AKAP7|PRKACA	http://amigo.geneontology.org/amigo/term/GO:0034237
rRNA processing	Gene Ontology	GO:0006364	3	29	0.0251296	0.248754	RRP12|IMP4|DDX54	http://amigo.geneontology.org/amigo/term/GO:0006364
mitochondrial matrix	Gene Ontology	GO:0005759	3	29	0.0251296	0.248754	GLRX5|ACSM3|ACSM4	http://amigo.geneontology.org/amigo/term/GO:0005759
cellular response to amino acid stimulus	Gene Ontology	GO:0071230	2	11	0.0264962	0.25373	RRAGA|RRAGC	http://amigo.geneontology.org/amigo/term/GO:0071230
spliceosomal snRNP assembly	Gene Ontology	GO:0000387	2	11	0.0264962	0.25373	SNRPD3|GEMIN4	http://amigo.geneontology.org/amigo/term/GO:0000387
3'-5' DNA helicase activity	Gene Ontology	GO:0043138	2	11	0.0264962	0.25373	BLM|ACTR5	http://amigo.geneontology.org/amigo/term/GO:0043138
double-strand break repair via homologous recombination	Gene Ontology	GO:0000724	3	30	0.0272456	0.256415	BLM|PALB2|NSMCE1	http://amigo.geneontology.org/amigo/term/GO:0000724
presynaptic active zone	Gene Ontology	GO:0048786	2	12	0.0305124	0.268815	ARHGAP44|PPFIBP2	http://amigo.geneontology.org/amigo/term/GO:0048786
N-glycan processing	Gene Ontology	GO:0006491	2	12	0.0305124	0.268815	ST8SIA2|MAN2A2	http://amigo.geneontology.org/amigo/term/GO:0006491
calcium ion-regulated exocytosis of neurotransmitter	Gene Ontology	GO:0048791	2	12	0.0305124	0.268815	SYT17|RIMS3	http://amigo.geneontology.org/amigo/term/GO:0048791
U2 snRNP	Gene Ontology	GO:0005686	2	12	0.0305124	0.268815	SF3B5|SNRPD3	http://amigo.geneontology.org/amigo/term/GO:0005686
actin filament organization	Gene Ontology	GO:0007015	4	56	0.0311942	0.2721	ARHGAP17|CORO1A|HIP1|LMOD3	http://amigo.geneontology.org/amigo/term/GO:0007015
cytokine-mediated signaling pathway	Gene Ontology	GO:0019221	4	57	0.032878	0.281218	IFNAR2|IFNAR1|IFNGR2|IL10RB	http://amigo.geneontology.org/amigo/term/GO:0019221
DNA repair	Gene Ontology	GO:0006281	3	33	0.0341442	0.283487	BLM|FANCL|PDS5A	http://amigo.geneontology.org/amigo/term/GO:0006281
endoribonuclease activity	Gene Ontology	GO:0004521	2	13	0.034752	0.283487	ZC3H12D|ERN2	http://amigo.geneontology.org/amigo/term/GO:0004521
acyl-CoA metabolic process	Gene Ontology	GO:0006637	2	13	0.034752	0.283487	ACSM3|ACSM4	http://amigo.geneontology.org/amigo/term/GO:0006637
adenylate cyclase-activating adrenergic receptor signaling pathway	Gene Ontology	GO:0071880	2	13	0.034752	0.283487	DRD3|DRD1	http://amigo.geneontology.org/amigo/term/GO:0071880
extracellular space	Gene Ontology	GO:0005615	21	667	0.0351922	0.284443	LBP|VWC2|TIMP4|SLIT1|BPI|COL14A1|UMOD|ZG16|CST3|SMPD1|COL13A1|PODNL1|PXDN|IL27|SFTPA1|COL9A2|COL24A1|GP2|GDF2|VPREB3|GDF10	http://amigo.geneontology.org/amigo/term/GO:0005615
regulation of neurogenesis	Gene Ontology	GO:0050767	2	14	0.0392047	0.304642	HES1|HEYL	http://amigo.geneontology.org/amigo/term/GO:0050767
protein localization	Gene Ontology	GO:0008104	2	14	0.0392047	0.304642	PARD3|LYST	http://amigo.geneontology.org/amigo/term/GO:0008104
hydro-lyase activity	Gene Ontology	GO:0016836	2	14	0.0392047	0.304642	CA1|CA8	http://amigo.geneontology.org/amigo/term/GO:0016836
endoplasmic reticulum unfolded protein response	Gene Ontology	GO:0030968	2	15	0.0438602	0.304642	WFS1|ERN2	http://amigo.geneontology.org/amigo/term/GO:0030968
mitotic spindle organization	Gene Ontology	GO:0007052	2	15	0.0438602	0.304642	KIF7|STIL	http://amigo.geneontology.org/amigo/term/GO:0007052
smoothened signaling pathway	Gene Ontology	GO:0007224	2	15	0.0438602	0.304642	TCTN3|STIL	http://amigo.geneontology.org/amigo/term/GO:0007224
dynein light intermediate chain binding	Gene Ontology	GO:0051959	2	15	0.0438602	0.304642	HOOK2|DNHD1	http://amigo.geneontology.org/amigo/term/GO:0051959
negative regulation of transcription, DNA-templated	Gene Ontology	GO:0045892	5	92	0.0440094	0.304642	L3MBTL3|MDM2|PHF10|SIRT1|VGLL4	http://amigo.geneontology.org/amigo/term/GO:0045892
plasma membrane	Gene Ontology	GO:0005886	27	932	0.0445472	0.304642	SLC6A6|PI4KA|IFNAR2|IFNAR1|IFNGR2|ADAM17|RAF1|GPRC5B|IL10RB|ITSN1|PTGER1|NID1|SYT17|PPP1R16B|CLDN4|NPTX1|OPALIN|CDC42EP4|DLL1|PIK3C2G|SH2B1|BDKRB1|BDKRB2|ROBO1|RELL1|FZD8|ADGRA3	http://amigo.geneontology.org/amigo/term/GO:0005886
DNA-binding transcription factor activity	Gene Ontology	GO:0003700	8	190	0.0445825	0.304642	BACH1|ZNF80|RFX1|NR2C2|MYRFL|ZNF768|ZNF70|IKZF1	http://amigo.geneontology.org/amigo/term/GO:0003700
protein tyrosine phosphatase activity	Gene Ontology	GO:0004725	3	37	0.0446071	0.304642	PTPN20|EPM2A|PALD1	http://amigo.geneontology.org/amigo/term/GO:0004725
integral component of endoplasmic reticulum membrane	Gene Ontology	GO:0030176	3	37	0.0446071	0.304642	LRIT1|SGMS1|WFS1	http://amigo.geneontology.org/amigo/term/GO:0030176
ribonucleoprotein complex	Gene Ontology	GO:1990904	3	37	0.0446071	0.304642	EFL1|PABPC4|HNRNPH3	http://amigo.geneontology.org/amigo/term/GO:1990904
Rab GTPase binding	Gene Ontology	GO:0017137	4	65	0.0482311	0.320243	YIPF1|USP6NL|TBC1D16|RIMS3	http://amigo.geneontology.org/amigo/term/GO:0017137
calcium-ion regulated exocytosis	Gene Ontology	GO:0017156	2	16	0.0487089	0.320243	ARHGAP17|SYT17	http://amigo.geneontology.org/amigo/term/GO:0017156
regulation of dopamine secretion	Gene Ontology	GO:0014059	2	16	0.0487089	0.320243	DRD3|SYT17	http://amigo.geneontology.org/amigo/term/GO:0014059
fatty acid biosynthetic process	Gene Ontology	GO:0006633	2	16	0.0487089	0.320243	ACSM3|ACSM4	http://amigo.geneontology.org/amigo/term/GO:0006633
adenylate cyclase-modulating G protein-coupled receptor signaling pathway	Gene Ontology	GO:0007188	3	39	0.050367	0.326274	DRD3|GNAZ|DRD1	http://amigo.geneontology.org/amigo/term/GO:0007188
cell-cell junction	Gene Ontology	GO:0005911	3	40	0.0533757	0.335886	LIMS2|COL13A1|FRMD1	http://amigo.geneontology.org/amigo/term/GO:0005911
nucleoplasm	Gene Ontology	GO:0005654	7	166	0.0576485	0.346222	SIRT1|BNC1|PALB2|HNRNPH3|MDM2|PLAGL1|ZBTB20	http://amigo.geneontology.org/amigo/term/GO:0005654
Rab guanyl-nucleotide exchange factor activity	Gene Ontology	GO:0017112	2	18	0.0589482	0.346222	DENND4C|RAB3IP	http://amigo.geneontology.org/amigo/term/GO:0017112
RNA polymerase II activating transcription factor binding	Gene Ontology	GO:0001102	2	18	0.0589482	0.346222	TBX3|TBX5	http://amigo.geneontology.org/amigo/term/GO:0001102
protein processing	Gene Ontology	GO:0016485	2	18	0.0589482	0.346222	LONP2|FURIN	http://amigo.geneontology.org/amigo/term/GO:0016485
cell fate specification	Gene Ontology	GO:0001708	2	18	0.0589482	0.346222	TBX3|TBX5	http://amigo.geneontology.org/amigo/term/GO:0001708
substrate adhesion-dependent cell spreading	Gene Ontology	GO:0034446	2	18	0.0589482	0.346222	PARVB|USH2A	http://amigo.geneontology.org/amigo/term/GO:0034446
regulation of autophagy	Gene Ontology	GO:0010506	2	18	0.0589482	0.346222	RRAGA|RRAGC	http://amigo.geneontology.org/amigo/term/GO:0010506
basement membrane	Gene Ontology	GO:0005604	2	18	0.0589482	0.346222	LAMA2|USH2A	http://amigo.geneontology.org/amigo/term/GO:0005604
Wnt-protein binding	Gene Ontology	GO:0017147	2	20	0.0698504	0.384614	FZD8|TRABD2B	http://amigo.geneontology.org/amigo/term/GO:0017147
one-carbon metabolic process	Gene Ontology	GO:0006730	2	20	0.0698504	0.384614	CA1|CA8	http://amigo.geneontology.org/amigo/term/GO:0006730
retrograde transport, endosome to Golgi	Gene Ontology	GO:0042147	2	22	0.0813478	0.392804	VPS53|STX10	http://amigo.geneontology.org/amigo/term/GO:0042147
phosphatidylinositol-mediated signaling	Gene Ontology	GO:0048015	2	22	0.0813478	0.392804	PIK3C2G|PI4KA	http://amigo.geneontology.org/amigo/term/GO:0048015
phosphatidylinositol phosphorylation	Gene Ontology	GO:0046854	2	24	0.0933771	0.392804	PIK3C2G|PI4KA	http://amigo.geneontology.org/amigo/term/GO:0046854
tissue development	Gene Ontology	GO:0009888	2	25	0.0995725	0.392804	LAMA2|USH2A	http://amigo.geneontology.org/amigo/term/GO:0009888
heterotrimeric G-protein complex	Gene Ontology	GO:0005834	2	25	0.0995725	0.392804	GNG4|GNAZ	http://amigo.geneontology.org/amigo/term/GO:0005834
clathrin binding	Gene Ontology	GO:0030276	2	26	0.105879	0.392804	HIP1|SYT17	http://amigo.geneontology.org/amigo/term/GO:0030276
integral component of Golgi membrane	Gene Ontology	GO:0030173	2	26	0.105879	0.392804	SGMS1|FURIN	http://amigo.geneontology.org/amigo/term/GO:0030173
mitochondrial respiratory chain complex I	Gene Ontology	GO:0005747	2	26	0.105879	0.392804	NDUFB7|NDUFAB1	http://amigo.geneontology.org/amigo/term/GO:0005747
nuclear chromatin	Gene Ontology	GO:0000790	5	121	0.10619	0.392804	NR2C2|PHF10|TFAM|ZNF80|IKZF1	http://amigo.geneontology.org/amigo/term/GO:0000790
chromatin remodeling	Gene Ontology	GO:0006338	2	27	0.11229	0.392804	TADA2B|TFAM	http://amigo.geneontology.org/amigo/term/GO:0006338
cellular calcium ion homeostasis	Gene Ontology	GO:0006874	2	27	0.11229	0.392804	SLC8B1|ATP2A1	http://amigo.geneontology.org/amigo/term/GO:0006874
ion channel binding	Gene Ontology	GO:0044325	2	27	0.11229	0.392804	KCNAB1|RIMS3	http://amigo.geneontology.org/amigo/term/GO:0044325
hepoxilin biosynthetic process	Gene Ontology	GO:0051122	1	5	0.113243	0.392804	ALOX5	http://amigo.geneontology.org/amigo/term/GO:0051122
box C/D snoRNP assembly	Gene Ontology	GO:0000492	1	5	0.113243	0.392804	ZNHIT6	http://amigo.geneontology.org/amigo/term/GO:0000492
U4 snRNP	Gene Ontology	GO:0005687	1	5	0.113243	0.392804	SNRPD3	http://amigo.geneontology.org/amigo/term/GO:0005687
lipoxygenase pathway	Gene Ontology	GO:0019372	1	5	0.113243	0.392804	ALOX5	http://amigo.geneontology.org/amigo/term/GO:0019372
extracellular exosome	Gene Ontology	GO:0070062	1	5	0.113243	0.392804	GPRC5B	http://amigo.geneontology.org/amigo/term/GO:0070062
protein kinase A signaling	Gene Ontology	GO:0010737	1	5	0.113243	0.392804	PRKACA	http://amigo.geneontology.org/amigo/term/GO:0010737
tRNA modification	Gene Ontology	GO:0006400	1	5	0.113243	0.392804	TRIT1	http://amigo.geneontology.org/amigo/term/GO:0006400
isocitrate metabolic process	Gene Ontology	GO:0006102	1	5	0.113243	0.392804	IDH2	http://amigo.geneontology.org/amigo/term/GO:0006102
linoleic acid metabolic process	Gene Ontology	GO:0043651	1	5	0.113243	0.392804	ALOX5	http://amigo.geneontology.org/amigo/term/GO:0043651
macrophage activation involved in immune response	Gene Ontology	GO:0002281	1	5	0.113243	0.392804	LBP	http://amigo.geneontology.org/amigo/term/GO:0002281
Lsm1-7-Pat1 complex	Gene Ontology	GO:1990726	1	5	0.113243	0.392804	LSM3	http://amigo.geneontology.org/amigo/term/GO:1990726
calcium-dependent protein serine/threonine kinase activity	Gene Ontology	GO:0009931	1	5	0.113243	0.392804	MKNK1	http://amigo.geneontology.org/amigo/term/GO:0009931
regulation of translational initiation	Gene Ontology	GO:0006446	1	5	0.113243	0.392804	CTIF	http://amigo.geneontology.org/amigo/term/GO:0006446
nuclear origin of replication recognition complex	Gene Ontology	GO:0005664	1	5	0.113243	0.392804	ORC6	http://amigo.geneontology.org/amigo/term/GO:0005664
BLOC-1 complex	Gene Ontology	GO:0031083	1	5	0.113243	0.392804	BLOC1S4	http://amigo.geneontology.org/amigo/term/GO:0031083
piRNA metabolic process	Gene Ontology	GO:0034587	1	5	0.113243	0.392804	FKBP6	http://amigo.geneontology.org/amigo/term/GO:0034587
peroxisomal matrix	Gene Ontology	GO:0005782	1	5	0.113243	0.392804	LONP2	http://amigo.geneontology.org/amigo/term/GO:0005782
protein-arginine deiminase activity	Gene Ontology	GO:0004668	1	5	0.113243	0.392804	PADI2	http://amigo.geneontology.org/amigo/term/GO:0004668
translation activator activity	Gene Ontology	GO:0008494	1	5	0.113243	0.392804	CTIF	http://amigo.geneontology.org/amigo/term/GO:0008494
E-box binding	Gene Ontology	GO:0070888	1	5	0.113243	0.392804	HES1	http://amigo.geneontology.org/amigo/term/GO:0070888
regulation of mRNA splicing, via spliceosome	Gene Ontology	GO:0048024	1	5	0.113243	0.392804	SON	http://amigo.geneontology.org/amigo/term/GO:0048024
alpha-tubulin binding	Gene Ontology	GO:0043014	1	5	0.113243	0.392804	FAM110C	http://amigo.geneontology.org/amigo/term/GO:0043014
presynaptic active zone cytoplasmic component	Gene Ontology	GO:0098831	1	5	0.113243	0.392804	RIMS3	http://amigo.geneontology.org/amigo/term/GO:0098831
histone citrullination	Gene Ontology	GO:0036414	1	5	0.113243	0.392804	PADI2	http://amigo.geneontology.org/amigo/term/GO:0036414
protein localization to membrane	Gene Ontology	GO:0072657	1	5	0.113243	0.392804	TM9SF3	http://amigo.geneontology.org/amigo/term/GO:0072657
intrinsic apoptotic signaling pathway in response to endoplasmic reticulum stress	Gene Ontology	GO:0070059	1	5	0.113243	0.392804	ERN2	http://amigo.geneontology.org/amigo/term/GO:0070059
-	Gene Ontology	GO:0043408	1	5	0.113243	0.392804	NTRK3	http://amigo.geneontology.org/amigo/term/GO:0043408
type I interferon signaling pathway	Gene Ontology	GO:0060337	1	5	0.113243	0.392804	IFNAR2	http://amigo.geneontology.org/amigo/term/GO:0060337
Toll signaling pathway	Gene Ontology	GO:0008063	1	5	0.113243	0.392804	PALM3	http://amigo.geneontology.org/amigo/term/GO:0008063
phospholipase C-activating dopamine receptor signaling pathway	Gene Ontology	GO:0060158	1	5	0.113243	0.392804	DRD3	http://amigo.geneontology.org/amigo/term/GO:0060158
lipid modification	Gene Ontology	GO:0030258	1	5	0.113243	0.392804	MBOAT2	http://amigo.geneontology.org/amigo/term/GO:0030258
phosphoric diester hydrolase activity	Gene Ontology	GO:0008081	1	5	0.113243	0.392804	SMPD1	http://amigo.geneontology.org/amigo/term/GO:0008081
regulation of synaptic vesicle exocytosis	Gene Ontology	GO:2000300	1	5	0.113243	0.392804	RIMS3	http://amigo.geneontology.org/amigo/term/GO:2000300
pre-mRNA cleavage required for polyadenylation	Gene Ontology	GO:0098789	1	5	0.113243	0.392804	CPSF4L	http://amigo.geneontology.org/amigo/term/GO:0098789
nuclear heterochromatin	Gene Ontology	GO:0005720	1	5	0.113243	0.392804	SIRT1	http://amigo.geneontology.org/amigo/term/GO:0005720
apical part of cell	Gene Ontology	GO:0045177	1	5	0.113243	0.392804	KNCN	http://amigo.geneontology.org/amigo/term/GO:0045177
negative regulation of membrane protein ectodomain proteolysis	Gene Ontology	GO:0051045	1	5	0.113243	0.392804	TIMP4	http://amigo.geneontology.org/amigo/term/GO:0051045
selenocysteine incorporation	Gene Ontology	GO:0001514	1	5	0.113243	0.392804	SEPSECS	http://amigo.geneontology.org/amigo/term/GO:0001514
DNA binding, bending	Gene Ontology	GO:0008301	1	5	0.113243	0.392804	TFAM	http://amigo.geneontology.org/amigo/term/GO:0008301
histone H3 deacetylation	Gene Ontology	GO:0070932	1	5	0.113243	0.392804	SIRT1	http://amigo.geneontology.org/amigo/term/GO:0070932
alpha-mannosidase activity	Gene Ontology	GO:0004559	1	5	0.113243	0.392804	MAN2A2	http://amigo.geneontology.org/amigo/term/GO:0004559
negative regulation of interleukin-6 production	Gene Ontology	GO:0032715	1	5	0.113243	0.392804	BPI	http://amigo.geneontology.org/amigo/term/GO:0032715
Cul3-RING ubiquitin ligase complex	Gene Ontology	GO:0031463	1	5	0.113243	0.392804	KLHL25	http://amigo.geneontology.org/amigo/term/GO:0031463
peptide alpha-N-acetyltransferase activity	Gene Ontology	GO:0004596	1	5	0.113243	0.392804	NAA25	http://amigo.geneontology.org/amigo/term/GO:0004596
endoplasmic reticulum tubular network organization	Gene Ontology	GO:0071786	1	5	0.113243	0.392804	REEP3	http://amigo.geneontology.org/amigo/term/GO:0071786
synaptic vesicle membrane	Gene Ontology	GO:0030672	2	28	0.118798	0.392804	SV2B|MCTP2	http://amigo.geneontology.org/amigo/term/GO:0030672
positive regulation of transcription by RNA polymerase II	Gene Ontology	GO:0045944	11	359	0.120653	0.392804	MYCL|PHF10|LHX5|TET1|GLIS1|PPARGC1A|NR2C2|TBX3|EBF3|KLF1|TBX5	http://amigo.geneontology.org/amigo/term/GO:0045944
G protein-coupled receptor binding	Gene Ontology	GO:0001664	2	29	0.125397	0.392804	GNAZ|PROK2	http://amigo.geneontology.org/amigo/term/GO:0001664
positive regulation of pathway-restricted SMAD protein phosphorylation	Gene Ontology	GO:0010862	2	29	0.125397	0.392804	GDF2|GDF10	http://amigo.geneontology.org/amigo/term/GO:0010862
nucleoside diphosphate phosphorylation	Gene Ontology	GO:0006165	1	6	0.130831	0.392804	AK7	http://amigo.geneontology.org/amigo/term/GO:0006165
TORC1 complex	Gene Ontology	GO:0031931	1	6	0.130831	0.392804	SMG1	http://amigo.geneontology.org/amigo/term/GO:0031931
3'-5' exonuclease activity	Gene Ontology	GO:0008408	1	6	0.130831	0.392804	TRIR	http://amigo.geneontology.org/amigo/term/GO:0008408
peptide hormone processing	Gene Ontology	GO:0016486	1	6	0.130831	0.392804	FURIN	http://amigo.geneontology.org/amigo/term/GO:0016486
endoplasmic reticulum tubular network	Gene Ontology	GO:0071782	1	6	0.130831	0.392804	REEP3	http://amigo.geneontology.org/amigo/term/GO:0071782
anchored component of external side of plasma membrane	Gene Ontology	GO:0031362	1	6	0.130831	0.392804	RTBDN	http://amigo.geneontology.org/amigo/term/GO:0031362
regulation of protein kinase A signaling	Gene Ontology	GO:0010738	1	6	0.130831	0.392804	AKAP7	http://amigo.geneontology.org/amigo/term/GO:0010738
spliceosomal tri-snRNP complex	Gene Ontology	GO:0097526	1	6	0.130831	0.392804	SNRPD3	http://amigo.geneontology.org/amigo/term/GO:0097526
establishment or maintenance of epithelial cell apical/basal polarity	Gene Ontology	GO:0045197	1	6	0.130831	0.392804	PARD3	http://amigo.geneontology.org/amigo/term/GO:0045197
lamellipodium assembly	Gene Ontology	GO:0030032	1	6	0.130831	0.392804	PARVB	http://amigo.geneontology.org/amigo/term/GO:0030032
clathrin-coated pit	Gene Ontology	GO:0005905	1	6	0.130831	0.392804	ITSN1	http://amigo.geneontology.org/amigo/term/GO:0005905
cilium-dependent cell motility	Gene Ontology	GO:0060285	1	6	0.130831	0.392804	CFAP44	http://amigo.geneontology.org/amigo/term/GO:0060285
SMN complex	Gene Ontology	GO:0032797	1	6	0.130831	0.392804	GEMIN4	http://amigo.geneontology.org/amigo/term/GO:0032797
positive regulation of synaptic transmission	Gene Ontology	GO:0050806	1	6	0.130831	0.392804	RIMS3	http://amigo.geneontology.org/amigo/term/GO:0050806
neurotransmitter receptor transport, endosome to postsynaptic membrane	Gene Ontology	GO:0098887	1	6	0.130831	0.392804	ARHGAP44	http://amigo.geneontology.org/amigo/term/GO:0098887
P-body assembly	Gene Ontology	GO:0033962	1	6	0.130831	0.392804	LSM3	http://amigo.geneontology.org/amigo/term/GO:0033962
protein depalmitoylation	Gene Ontology	GO:0002084	1	6	0.130831	0.392804	PPT1	http://amigo.geneontology.org/amigo/term/GO:0002084
peptidyl-proline hydroxylation to 4-hydroxy-L-proline	Gene Ontology	GO:0018401	1	6	0.130831	0.392804	EGLN1	http://amigo.geneontology.org/amigo/term/GO:0018401
poly(U) RNA binding	Gene Ontology	GO:0008266	1	6	0.130831	0.392804	PABPC4	http://amigo.geneontology.org/amigo/term/GO:0008266
Golgi transport complex	Gene Ontology	GO:0017119	1	6	0.130831	0.392804	COG7	http://amigo.geneontology.org/amigo/term/GO:0017119
chromosome	Gene Ontology	GO:0005694	1	6	0.130831	0.392804	BLM	http://amigo.geneontology.org/amigo/term/GO:0005694
aerobic respiration	Gene Ontology	GO:0009060	1	6	0.130831	0.392804	SDHB	http://amigo.geneontology.org/amigo/term/GO:0009060
establishment of cell polarity	Gene Ontology	GO:0030010	1	6	0.130831	0.392804	PARD3	http://amigo.geneontology.org/amigo/term/GO:0030010
cGMP binding	Gene Ontology	GO:0030553	1	6	0.130831	0.392804	CNGA4	http://amigo.geneontology.org/amigo/term/GO:0030553
regulation of neurotransmitter secretion	Gene Ontology	GO:0046928	1	6	0.130831	0.392804	MCTP2	http://amigo.geneontology.org/amigo/term/GO:0046928
signal peptide processing	Gene Ontology	GO:0006465	1	6	0.130831	0.392804	SEC11A	http://amigo.geneontology.org/amigo/term/GO:0006465
mitotic G2 DNA damage checkpoint	Gene Ontology	GO:0007095	1	6	0.130831	0.392804	CDK1	http://amigo.geneontology.org/amigo/term/GO:0007095
exonuclease activity	Gene Ontology	GO:0004527	1	6	0.130831	0.392804	REXO5	http://amigo.geneontology.org/amigo/term/GO:0004527
membrane protein ectodomain proteolysis	Gene Ontology	GO:0006509	1	6	0.130831	0.392804	ADAM17	http://amigo.geneontology.org/amigo/term/GO:0006509
1-phosphatidylinositol-4-phosphate 3-kinase activity	Gene Ontology	GO:0035005	1	6	0.130831	0.392804	PIK3C2G	http://amigo.geneontology.org/amigo/term/GO:0035005
progesterone metabolic process	Gene Ontology	GO:0042448	1	6	0.130831	0.392804	CYP17A1	http://amigo.geneontology.org/amigo/term/GO:0042448
negative regulation of cell cycle	Gene Ontology	GO:0045786	1	6	0.130831	0.392804	NUPR1	http://amigo.geneontology.org/amigo/term/GO:0045786
presynapse	Gene Ontology	GO:0098793	1	6	0.130831	0.392804	HIP1	http://amigo.geneontology.org/amigo/term/GO:0098793
transcription factor TFIIIC complex	Gene Ontology	GO:0000127	1	6	0.130831	0.392804	GTF3C1	http://amigo.geneontology.org/amigo/term/GO:0000127
protein kinase activator activity	Gene Ontology	GO:0030295	1	6	0.130831	0.392804	GPRC5B	http://amigo.geneontology.org/amigo/term/GO:0030295
metalloendopeptidase inhibitor activity	Gene Ontology	GO:0008191	1	6	0.130831	0.392804	TIMP4	http://amigo.geneontology.org/amigo/term/GO:0008191
enoyl-CoA hydratase activity	Gene Ontology	GO:0004300	1	6	0.130831	0.392804	ECHDC2	http://amigo.geneontology.org/amigo/term/GO:0004300
alpha-N-acetylneuraminate alpha-2,8-sialyltransferase activity	Gene Ontology	GO:0003828	1	6	0.130831	0.392804	ST8SIA2	http://amigo.geneontology.org/amigo/term/GO:0003828
anterior/posterior pattern specification	Gene Ontology	GO:0009952	2	30	0.132082	0.392804	HES1|HEYL	http://amigo.geneontology.org/amigo/term/GO:0009952
cell cortex	Gene Ontology	GO:0005938	2	30	0.132082	0.392804	FAM110C|PARD3	http://amigo.geneontology.org/amigo/term/GO:0005938
extrinsic component of cytoplasmic side of plasma membrane	Gene Ontology	GO:0031234	2	30	0.132082	0.392804	KCNAB1|FES	http://amigo.geneontology.org/amigo/term/GO:0031234
mRNA splicing, via spliceosome	Gene Ontology	GO:0000398	3	62	0.138519	0.392804	SF3B5|LSM3|DDX39A	http://amigo.geneontology.org/amigo/term/GO:0000398
cytoplasmic microtubule organization	Gene Ontology	GO:0031122	2	31	0.138845	0.392804	HOOK2|KATNA1	http://amigo.geneontology.org/amigo/term/GO:0031122
DNA binding	Gene Ontology	GO:0003677	4	97	0.141257	0.392804	MBD4|PALB2|RFC1|PPARGC1A	http://amigo.geneontology.org/amigo/term/GO:0003677
adenylate cyclase-activating G protein-coupled receptor signaling pathway	Gene Ontology	GO:0007189	3	64	0.147754	0.392804	ADGRB3|PTGER1|ADGRL1	http://amigo.geneontology.org/amigo/term/GO:0007189
U6 snRNP	Gene Ontology	GO:0005688	1	7	0.14807	0.392804	LSM3	http://amigo.geneontology.org/amigo/term/GO:0005688
histone H2A-K119 monoubiquitination	Gene Ontology	GO:0036353	1	7	0.14807	0.392804	PCGF6	http://amigo.geneontology.org/amigo/term/GO:0036353
response to hormone	Gene Ontology	GO:0009725	1	7	0.14807	0.392804	TIMP4	http://amigo.geneontology.org/amigo/term/GO:0009725
formation of translation preinitiation complex	Gene Ontology	GO:0001731	1	7	0.14807	0.392804	EIF4H	http://amigo.geneontology.org/amigo/term/GO:0001731
integral component of nuclear inner membrane	Gene Ontology	GO:0005639	1	7	0.14807	0.392804	TMEM43	http://amigo.geneontology.org/amigo/term/GO:0005639
autophagy	Gene Ontology	GO:0006914	1	7	0.14807	0.392804	NRBF2	http://amigo.geneontology.org/amigo/term/GO:0006914
ribonucleoprotein complex binding	Gene Ontology	GO:0043021	1	7	0.14807	0.392804	MDM2	http://amigo.geneontology.org/amigo/term/GO:0043021
DNA recombination	Gene Ontology	GO:0006310	1	7	0.14807	0.392804	BLM	http://amigo.geneontology.org/amigo/term/GO:0006310
glycosaminoglycan binding	Gene Ontology	GO:0005539	1	7	0.14807	0.392804	SGSH	http://amigo.geneontology.org/amigo/term/GO:0005539
nucleoside triphosphate biosynthetic process	Gene Ontology	GO:0009142	1	7	0.14807	0.392804	AK7	http://amigo.geneontology.org/amigo/term/GO:0009142
exon-exon junction complex	Gene Ontology	GO:0035145	1	7	0.14807	0.392804	MAGOH	http://amigo.geneontology.org/amigo/term/GO:0035145
sarcoplasmic reticulum membrane	Gene Ontology	GO:0033017	1	7	0.14807	0.392804	ATP2A1	http://amigo.geneontology.org/amigo/term/GO:0033017
activating transcription factor binding	Gene Ontology	GO:0033613	1	7	0.14807	0.392804	FRMD1	http://amigo.geneontology.org/amigo/term/GO:0033613
eukaryotic translation initiation factor 4F complex	Gene Ontology	GO:0016281	1	7	0.14807	0.392804	EIF4E3	http://amigo.geneontology.org/amigo/term/GO:0016281
phosphatidylinositol 3-kinase signaling	Gene Ontology	GO:0014065	1	7	0.14807	0.392804	PIK3C2G	http://amigo.geneontology.org/amigo/term/GO:0014065
G-protein beta/gamma-subunit complex	Gene Ontology	GO:0031680	1	7	0.14807	0.392804	GNG4	http://amigo.geneontology.org/amigo/term/GO:0031680
RNA 7-methylguanosine cap binding	Gene Ontology	GO:0000340	1	7	0.14807	0.392804	EIF4E3	http://amigo.geneontology.org/amigo/term/GO:0000340
ATP-dependent microtubule motor activity, minus-end-directed	Gene Ontology	GO:0008569	1	7	0.14807	0.392804	DNHD1	http://amigo.geneontology.org/amigo/term/GO:0008569
phosphatidylinositol-3-phosphate biosynthetic process	Gene Ontology	GO:0036092	1	7	0.14807	0.392804	PIK3C2G	http://amigo.geneontology.org/amigo/term/GO:0036092
ribosomal small subunit binding	Gene Ontology	GO:0043024	1	7	0.14807	0.392804	EIF4H	http://amigo.geneontology.org/amigo/term/GO:0043024
heart looping	Gene Ontology	GO:0001947	1	7	0.14807	0.392804	TBX3	http://amigo.geneontology.org/amigo/term/GO:0001947
zinc ion transmembrane transport	Gene Ontology	GO:0071577	1	7	0.14807	0.392804	SLC39A11	http://amigo.geneontology.org/amigo/term/GO:0071577
1-phosphatidylinositol-3-kinase activity	Gene Ontology	GO:0016303	1	7	0.14807	0.392804	PIK3C2G	http://amigo.geneontology.org/amigo/term/GO:0016303
cellular response to stress	Gene Ontology	GO:0033554	1	7	0.14807	0.392804	PRDX2	http://amigo.geneontology.org/amigo/term/GO:0033554
negative regulation of Notch signaling pathway	Gene Ontology	GO:0045746	1	7	0.14807	0.392804	DLL1	http://amigo.geneontology.org/amigo/term/GO:0045746
fructose 1,6-bisphosphate metabolic process	Gene Ontology	GO:0030388	1	7	0.14807	0.392804	ALDOA	http://amigo.geneontology.org/amigo/term/GO:0030388
microtubule-severing ATPase activity	Gene Ontology	GO:0008568	1	7	0.14807	0.392804	KATNA1	http://amigo.geneontology.org/amigo/term/GO:0008568
protein disulfide isomerase activity	Gene Ontology	GO:0003756	1	7	0.14807	0.392804	ERO1B	http://amigo.geneontology.org/amigo/term/GO:0003756
regulation of synaptic plasticity	Gene Ontology	GO:0048167	1	7	0.14807	0.392804	RIMS3	http://amigo.geneontology.org/amigo/term/GO:0048167
protein maturation	Gene Ontology	GO:0051604	1	7	0.14807	0.392804	TSPAN15	http://amigo.geneontology.org/amigo/term/GO:0051604
negative regulation of neuron apoptotic process	Gene Ontology	GO:0043524	1	7	0.14807	0.392804	PPARGC1A	http://amigo.geneontology.org/amigo/term/GO:0043524
clathrin light chain binding	Gene Ontology	GO:0032051	1	7	0.14807	0.392804	HIP1	http://amigo.geneontology.org/amigo/term/GO:0032051
axon guidance	Gene Ontology	GO:0007411	3	65	0.152444	0.392804	ROBO1|LAMA2|SLIT1	http://amigo.geneontology.org/amigo/term/GO:0007411
peptidyl-serine phosphorylation	Gene Ontology	GO:0018105	3	66	0.157181	0.392804	LATS1|MKNK1|VRK1	http://amigo.geneontology.org/amigo/term/GO:0018105
regulation of cell shape	Gene Ontology	GO:0008360	2	34	0.159554	0.392804	PLXND1|CDC42EP4	http://amigo.geneontology.org/amigo/term/GO:0008360
vesicle-mediated transport	Gene Ontology	GO:0016192	3	67	0.161963	0.392804	AP3S2|AP3B2|SYT17	http://amigo.geneontology.org/amigo/term/GO:0016192
cilium assembly	Gene Ontology	GO:0060271	3	67	0.161963	0.392804	TCTN3|CFAP44|ARL3	http://amigo.geneontology.org/amigo/term/GO:0060271
semaphorin receptor complex	Gene Ontology	GO:0002116	1	8	0.164969	0.392804	PLXND1	http://amigo.geneontology.org/amigo/term/GO:0002116
adenylate kinase activity	Gene Ontology	GO:0004017	1	8	0.164969	0.392804	AK7	http://amigo.geneontology.org/amigo/term/GO:0004017
oxidative demethylation	Gene Ontology	GO:0070989	1	8	0.164969	0.392804	TET1	http://amigo.geneontology.org/amigo/term/GO:0070989
semaphorin-plexin signaling pathway involved in axon guidance	Gene Ontology	GO:1902287	1	8	0.164969	0.392804	PLXND1	http://amigo.geneontology.org/amigo/term/GO:1902287
synaptonemal complex	Gene Ontology	GO:0000795	1	8	0.164969	0.392804	FKBP6	http://amigo.geneontology.org/amigo/term/GO:0000795
snoRNA binding	Gene Ontology	GO:0030515	1	8	0.164969	0.392804	IMP4	http://amigo.geneontology.org/amigo/term/GO:0030515
Wnt-activated receptor activity	Gene Ontology	GO:0042813	1	8	0.164969	0.392804	FZD8	http://amigo.geneontology.org/amigo/term/GO:0042813
sperm flagellum	Gene Ontology	GO:0036126	1	8	0.164969	0.392804	CST11	http://amigo.geneontology.org/amigo/term/GO:0036126
negative regulation of angiogenesis	Gene Ontology	GO:0016525	1	8	0.164969	0.392804	THBS2	http://amigo.geneontology.org/amigo/term/GO:0016525
B cell receptor signaling pathway	Gene Ontology	GO:0050853	1	8	0.164969	0.392804	CD19	http://amigo.geneontology.org/amigo/term/GO:0050853
dynein complex	Gene Ontology	GO:0030286	1	8	0.164969	0.392804	DNHD1	http://amigo.geneontology.org/amigo/term/GO:0030286
myofibril assembly	Gene Ontology	GO:0030239	1	8	0.164969	0.392804	LMOD3	http://amigo.geneontology.org/amigo/term/GO:0030239
positive regulation of interferon-gamma production	Gene Ontology	GO:0032729	1	8	0.164969	0.392804	IL27	http://amigo.geneontology.org/amigo/term/GO:0032729
calcium transmembrane transporter activity, phosphorylative mechanism	Gene Ontology	GO:0005388	1	8	0.164969	0.392804	ATP2A1	http://amigo.geneontology.org/amigo/term/GO:0005388
chaperonin-containing T-complex	Gene Ontology	GO:0005832	1	8	0.164969	0.392804	CCT2	http://amigo.geneontology.org/amigo/term/GO:0005832
poly(A) binding	Gene Ontology	GO:0008143	1	8	0.164969	0.392804	PABPC4	http://amigo.geneontology.org/amigo/term/GO:0008143
positive regulation of actin filament polymerization	Gene Ontology	GO:0030838	1	8	0.164969	0.392804	CDC42EP4	http://amigo.geneontology.org/amigo/term/GO:0030838
protein modification by small protein conjugation	Gene Ontology	GO:0032446	1	8	0.164969	0.392804	UBA3	http://amigo.geneontology.org/amigo/term/GO:0032446
DNA duplex unwinding	Gene Ontology	GO:0032508	1	8	0.164969	0.392804	BLM	http://amigo.geneontology.org/amigo/term/GO:0032508
apical junction complex	Gene Ontology	GO:0043296	1	8	0.164969	0.392804	PARD3	http://amigo.geneontology.org/amigo/term/GO:0043296
positive regulation of vasoconstriction	Gene Ontology	GO:0045907	1	8	0.164969	0.392804	OXTR	http://amigo.geneontology.org/amigo/term/GO:0045907
cell redox homeostasis	Gene Ontology	GO:0045454	1	8	0.164969	0.392804	PRDX2	http://amigo.geneontology.org/amigo/term/GO:0045454
circadian rhythm	Gene Ontology	GO:0007623	1	8	0.164969	0.392804	PROK2	http://amigo.geneontology.org/amigo/term/GO:0007623
semaphorin receptor activity	Gene Ontology	GO:0017154	1	8	0.164969	0.392804	PLXND1	http://amigo.geneontology.org/amigo/term/GO:0017154
protein transmembrane transporter activity	Gene Ontology	GO:0008320	1	8	0.164969	0.392804	TOMM20	http://amigo.geneontology.org/amigo/term/GO:0008320
negative regulation of autophagy	Gene Ontology	GO:0010507	1	8	0.164969	0.392804	SMG1	http://amigo.geneontology.org/amigo/term/GO:0010507
RNA polymerase II CTD heptapeptide repeat kinase activity	Gene Ontology	GO:0008353	1	8	0.164969	0.392804	CDK1	http://amigo.geneontology.org/amigo/term/GO:0008353
cellular response to oxidative stress	Gene Ontology	GO:0034599	1	8	0.164969	0.392804	PPARGC1A	http://amigo.geneontology.org/amigo/term/GO:0034599
DNA demethylation	Gene Ontology	GO:0080111	1	8	0.164969	0.392804	TET1	http://amigo.geneontology.org/amigo/term/GO:0080111
sphingolipid metabolic process	Gene Ontology	GO:0006665	1	8	0.164969	0.392804	SGPL1	http://amigo.geneontology.org/amigo/term/GO:0006665
negative regulation of cell adhesion	Gene Ontology	GO:0007162	1	8	0.164969	0.392804	PLXND1	http://amigo.geneontology.org/amigo/term/GO:0007162
striated muscle thin filament	Gene Ontology	GO:0005865	1	8	0.164969	0.392804	LMOD3	http://amigo.geneontology.org/amigo/term/GO:0005865
Hsp70 protein binding	Gene Ontology	GO:0030544	1	8	0.164969	0.392804	DNAJB1	http://amigo.geneontology.org/amigo/term/GO:0030544
bicellular tight junction	Gene Ontology	GO:0005923	2	35	0.166579	0.392888	FRMD4B|CLDN4	http://amigo.geneontology.org/amigo/term/GO:0005923
collagen-containing extracellular matrix	Gene Ontology	GO:0062023	2	35	0.166579	0.392888	THBS2|COL14A1	http://amigo.geneontology.org/amigo/term/GO:0062023
unfolded protein binding	Gene Ontology	GO:0051082	2	36	0.173656	0.395985	DNAJB1|ERN2	http://amigo.geneontology.org/amigo/term/GO:0051082
defense response to Gram-positive bacterium	Gene Ontology	GO:0050830	2	36	0.173656	0.395985	LBP|LYZ	http://amigo.geneontology.org/amigo/term/GO:0050830
clathrin coat assembly	Gene Ontology	GO:0048268	1	9	0.181532	0.395985	HIP1	http://amigo.geneontology.org/amigo/term/GO:0048268
positive regulation of neuron projection development	Gene Ontology	GO:0010976	1	9	0.181532	0.395985	NTRK3	http://amigo.geneontology.org/amigo/term/GO:0010976
glycerophospholipid catabolic process	Gene Ontology	GO:0046475	1	9	0.181532	0.395985	SMPD4	http://amigo.geneontology.org/amigo/term/GO:0046475
heme biosynthetic process	Gene Ontology	GO:0006783	1	9	0.181532	0.395985	COX10	http://amigo.geneontology.org/amigo/term/GO:0006783
PRC1 complex	Gene Ontology	GO:0035102	1	9	0.181532	0.395985	PCGF6	http://amigo.geneontology.org/amigo/term/GO:0035102
myofibril	Gene Ontology	GO:0030016	1	9	0.181532	0.395985	LMOD3	http://amigo.geneontology.org/amigo/term/GO:0030016
sodium-independent organic anion transport	Gene Ontology	GO:0043252	1	9	0.181532	0.395985	SLCO3A1	http://amigo.geneontology.org/amigo/term/GO:0043252
mRNA processing	Gene Ontology	GO:0006397	1	9	0.181532	0.395985	SON	http://amigo.geneontology.org/amigo/term/GO:0006397
RNA splicing	Gene Ontology	GO:0008380	1	9	0.181532	0.395985	MAGOH	http://amigo.geneontology.org/amigo/term/GO:0008380
meiotic cell cycle	Gene Ontology	GO:0051321	1	9	0.181532	0.395985	FKBP6	http://amigo.geneontology.org/amigo/term/GO:0051321
MAPK cascade	Gene Ontology	GO:0000165	1	9	0.181532	0.395985	TAOK2	http://amigo.geneontology.org/amigo/term/GO:0000165
protein neddylation	Gene Ontology	GO:0045116	1	9	0.181532	0.395985	UBA3	http://amigo.geneontology.org/amigo/term/GO:0045116
DNA replication initiation	Gene Ontology	GO:0006270	1	9	0.181532	0.395985	ORC6	http://amigo.geneontology.org/amigo/term/GO:0006270
nuclear inner membrane	Gene Ontology	GO:0005637	1	9	0.181532	0.395985	SIRT1	http://amigo.geneontology.org/amigo/term/GO:0005637
protein export from nucleus	Gene Ontology	GO:0006611	1	9	0.181532	0.395985	XPO6	http://amigo.geneontology.org/amigo/term/GO:0006611
Notch binding	Gene Ontology	GO:0005112	1	9	0.181532	0.395985	DLL1	http://amigo.geneontology.org/amigo/term/GO:0005112
G-protein beta-subunit binding	Gene Ontology	GO:0031681	1	9	0.181532	0.395985	GNG4	http://amigo.geneontology.org/amigo/term/GO:0031681
carbonate dehydratase activity	Gene Ontology	GO:0004089	1	9	0.181532	0.395985	CA1	http://amigo.geneontology.org/amigo/term/GO:0004089
response to oxidative stress	Gene Ontology	GO:0006979	1	9	0.181532	0.395985	PRDX2	http://amigo.geneontology.org/amigo/term/GO:0006979
DNA unwinding involved in DNA replication	Gene Ontology	GO:0006268	1	9	0.181532	0.395985	BLM	http://amigo.geneontology.org/amigo/term/GO:0006268
cell-cell junction organization	Gene Ontology	GO:0045216	1	9	0.181532	0.395985	LIMS2	http://amigo.geneontology.org/amigo/term/GO:0045216
purine nucleotide metabolic process	Gene Ontology	GO:0006163	1	9	0.181532	0.395985	AK7	http://amigo.geneontology.org/amigo/term/GO:0006163
nuclear exosome (RNase complex)	Gene Ontology	GO:0000176	1	9	0.181532	0.395985	EXOSC1	http://amigo.geneontology.org/amigo/term/GO:0000176
synapse organization	Gene Ontology	GO:0050808	1	9	0.181532	0.395985	PPFIBP2	http://amigo.geneontology.org/amigo/term/GO:0050808
RNA polymerase II cis-regulatory region sequence-specific DNA binding	Gene Ontology	GO:0000978	9	310	0.185202	0.395985	MYCL|ZNF629|IKZF1|BACH1|RFX1|NR2C2|ZBTB20|PLAGL1|OLIG2	http://amigo.geneontology.org/amigo/term/GO:0000978
protein kinase binding	Gene Ontology	GO:0019901	3	72	0.186489	0.395985	LAT|LYST|GPRC5B	http://amigo.geneontology.org/amigo/term/GO:0019901
transcription corepressor activity	Gene Ontology	GO:0003714	3	72	0.186489	0.395985	IRF2BP2|DNAJB1|SIRT1	http://amigo.geneontology.org/amigo/term/GO:0003714
endoplasmic reticulum membrane	Gene Ontology	GO:0005789	4	109	0.186898	0.395985	REEP3|MYRFL|ERO1B|ERN2	http://amigo.geneontology.org/amigo/term/GO:0005789
postsynaptic density	Gene Ontology	GO:0014069	2	38	0.187947	0.395985	ARHGAP44|ADGRL1	http://amigo.geneontology.org/amigo/term/GO:0014069
SMAD protein signal transduction	Gene Ontology	GO:0060395	2	38	0.187947	0.395985	GDF2|GDF10	http://amigo.geneontology.org/amigo/term/GO:0060395
canonical Wnt signaling pathway	Gene Ontology	GO:0060070	2	38	0.187947	0.395985	FZD8|NID1	http://amigo.geneontology.org/amigo/term/GO:0060070
ubiquitin protein ligase activity	Gene Ontology	GO:0061630	5	149	0.191797	0.395985	IRF2BP2|MDM2|FANCL|SHPRH|RAD18	http://amigo.geneontology.org/amigo/term/GO:0061630
centriole	Gene Ontology	GO:0005814	2	39	0.195152	0.395985	SPICE1|STIL	http://amigo.geneontology.org/amigo/term/GO:0005814
chaperone-mediated protein folding	Gene Ontology	GO:0061077	1	10	0.197768	0.395985	UNC45A	http://amigo.geneontology.org/amigo/term/GO:0061077
nuclear import signal receptor activity	Gene Ontology	GO:0061608	1	10	0.197768	0.395985	TNPO2	http://amigo.geneontology.org/amigo/term/GO:0061608
sodium-independent organic anion transmembrane transporter activity	Gene Ontology	GO:0015347	1	10	0.197768	0.395985	SLCO3A1	http://amigo.geneontology.org/amigo/term/GO:0015347
phosphatidylinositol-4-phosphate binding	Gene Ontology	GO:0070273	1	10	0.197768	0.395985	PLEKHA5	http://amigo.geneontology.org/amigo/term/GO:0070273
dynein intermediate chain binding	Gene Ontology	GO:0045505	1	10	0.197768	0.395985	DNHD1	http://amigo.geneontology.org/amigo/term/GO:0045505
ubiquinone biosynthetic process	Gene Ontology	GO:0006744	1	10	0.197768	0.395985	COQ7	http://amigo.geneontology.org/amigo/term/GO:0006744
cellular response to hypoxia	Gene Ontology	GO:0071456	1	10	0.197768	0.395985	EGLN1	http://amigo.geneontology.org/amigo/term/GO:0071456
collagen binding	Gene Ontology	GO:0005518	1	10	0.197768	0.395985	MUSK	http://amigo.geneontology.org/amigo/term/GO:0005518
response to cytokine	Gene Ontology	GO:0034097	1	10	0.197768	0.395985	TIMP4	http://amigo.geneontology.org/amigo/term/GO:0034097
heterophilic cell-cell adhesion via plasma membrane cell adhesion molecules	Gene Ontology	GO:0007157	1	10	0.197768	0.395985	ADGRL1	http://amigo.geneontology.org/amigo/term/GO:0007157
positive regulation of DNA-binding transcription factor activity	Gene Ontology	GO:0051091	1	10	0.197768	0.395985	PPARGC1A	http://amigo.geneontology.org/amigo/term/GO:0051091
L-amino acid transmembrane transporter activity	Gene Ontology	GO:0015179	1	10	0.197768	0.395985	SLC7A13	http://amigo.geneontology.org/amigo/term/GO:0015179
G1/S transition of mitotic cell cycle	Gene Ontology	GO:0000082	1	10	0.197768	0.395985	LATS1	http://amigo.geneontology.org/amigo/term/GO:0000082
mRNA cleavage and polyadenylation specificity factor complex	Gene Ontology	GO:0005847	1	10	0.197768	0.395985	CPSF4L	http://amigo.geneontology.org/amigo/term/GO:0005847
ferrous iron binding	Gene Ontology	GO:0008198	1	10	0.197768	0.395985	EGLN1	http://amigo.geneontology.org/amigo/term/GO:0008198
PcG protein complex	Gene Ontology	GO:0031519	1	10	0.197768	0.395985	PCGF6	http://amigo.geneontology.org/amigo/term/GO:0031519
regulation of actin filament polymerization	Gene Ontology	GO:0030833	1	10	0.197768	0.395985	ARHGAP40	http://amigo.geneontology.org/amigo/term/GO:0030833
lysosome organization	Gene Ontology	GO:0007040	1	10	0.197768	0.395985	CLN3	http://amigo.geneontology.org/amigo/term/GO:0007040
lipopeptide binding	Gene Ontology	GO:0071723	1	10	0.197768	0.395985	TLR1	http://amigo.geneontology.org/amigo/term/GO:0071723
protease binding	Gene Ontology	GO:0002020	1	10	0.197768	0.395985	TIMP4	http://amigo.geneontology.org/amigo/term/GO:0002020
tropomyosin binding	Gene Ontology	GO:0005523	1	10	0.197768	0.395985	LMOD3	http://amigo.geneontology.org/amigo/term/GO:0005523
cytoplasmic ribonucleoprotein granule	Gene Ontology	GO:0036464	1	10	0.197768	0.395985	ZC3H12D	http://amigo.geneontology.org/amigo/term/GO:0036464
G2/M transition of mitotic cell cycle	Gene Ontology	GO:0000086	1	10	0.197768	0.395985	CDK1	http://amigo.geneontology.org/amigo/term/GO:0000086
integral component of mitochondrial outer membrane	Gene Ontology	GO:0031307	1	10	0.197768	0.395985	TOMM20	http://amigo.geneontology.org/amigo/term/GO:0031307
acrosomal vesicle	Gene Ontology	GO:0001669	1	10	0.197768	0.395985	FAM170B	http://amigo.geneontology.org/amigo/term/GO:0001669
clathrin adaptor activity	Gene Ontology	GO:0035615	1	10	0.197768	0.395985	HIP1	http://amigo.geneontology.org/amigo/term/GO:0035615
protein kinase activity	Gene Ontology	GO:0004672	2	41	0.20966	0.399689	RAF1|ERN2	http://amigo.geneontology.org/amigo/term/GO:0004672
GTPase activity	Gene Ontology	GO:0003924	4	115	0.211295	0.399689	EFL1|RRAGA|GNAZ|RRAGC	http://amigo.geneontology.org/amigo/term/GO:0003924
protein serine/threonine kinase activity	Gene Ontology	GO:0004674	5	155	0.212676	0.399689	VRK1|LATS1|SMG1|ERN2|TAOK2	http://amigo.geneontology.org/amigo/term/GO:0004674
G protein-coupled receptor signaling pathway	Gene Ontology	GO:0007186	6	196	0.213642	0.399689	BDKRB1|BDKRB2|CCKAR|GNG4|NMBR|OXTR	http://amigo.geneontology.org/amigo/term/GO:0007186
ruffle membrane	Gene Ontology	GO:0032587	1	11	0.213681	0.399689	SH3YL1	http://amigo.geneontology.org/amigo/term/GO:0032587
toll-like receptor signaling pathway	Gene Ontology	GO:0002224	1	11	0.213681	0.399689	TLR1	http://amigo.geneontology.org/amigo/term/GO:0002224
oligosaccharide metabolic process	Gene Ontology	GO:0009311	1	11	0.213681	0.399689	ST8SIA2	http://amigo.geneontology.org/amigo/term/GO:0009311
nuclear body	Gene Ontology	GO:0016604	1	11	0.213681	0.399689	S100P	http://amigo.geneontology.org/amigo/term/GO:0016604
RNA polymerase II complex binding	Gene Ontology	GO:0000993	1	11	0.213681	0.399689	RPRD1B	http://amigo.geneontology.org/amigo/term/GO:0000993
palmitoyl-(protein) hydrolase activity	Gene Ontology	GO:0008474	1	11	0.213681	0.399689	PPT1	http://amigo.geneontology.org/amigo/term/GO:0008474
GTP-Rho binding	Gene Ontology	GO:0017049	1	11	0.213681	0.399689	CDC42EP4	http://amigo.geneontology.org/amigo/term/GO:0017049
peptidase activity	Gene Ontology	GO:0008233	1	11	0.213681	0.399689	SEC11A	http://amigo.geneontology.org/amigo/term/GO:0008233
actin cytoskeleton reorganization	Gene Ontology	GO:0031532	1	11	0.213681	0.399689	PARVB	http://amigo.geneontology.org/amigo/term/GO:0031532
lipid transport	Gene Ontology	GO:0006869	1	11	0.213681	0.399689	ABCA13	http://amigo.geneontology.org/amigo/term/GO:0006869
potassium channel regulator activity	Gene Ontology	GO:0015459	1	11	0.213681	0.399689	KCNAB1	http://amigo.geneontology.org/amigo/term/GO:0015459
DNA-directed DNA polymerase activity	Gene Ontology	GO:0003887	1	11	0.213681	0.399689	POLI	http://amigo.geneontology.org/amigo/term/GO:0003887
proton-exporting ATPase activity, phosphorylative mechanism	Gene Ontology	GO:0008553	1	11	0.213681	0.399689	ATP2A1	http://amigo.geneontology.org/amigo/term/GO:0008553
maturation of LSU-rRNA from tricistronic rRNA transcript (SSU-rRNA, 5.8S rRNA, LSU-rRNA)	Gene Ontology	GO:0000463	1	11	0.213681	0.399689	ZNHIT6	http://amigo.geneontology.org/amigo/term/GO:0000463
hippo signaling	Gene Ontology	GO:0035329	1	11	0.213681	0.399689	LATS1	http://amigo.geneontology.org/amigo/term/GO:0035329
protein autophosphorylation	Gene Ontology	GO:0046777	1	11	0.213681	0.399689	MKNK1	http://amigo.geneontology.org/amigo/term/GO:0046777
hydrogen peroxide catabolic process	Gene Ontology	GO:0042744	1	11	0.213681	0.399689	PRDX2	http://amigo.geneontology.org/amigo/term/GO:0042744
protein phosphatase 1 binding	Gene Ontology	GO:0008157	1	11	0.213681	0.399689	PPP1R16B	http://amigo.geneontology.org/amigo/term/GO:0008157
positive regulation of axonogenesis	Gene Ontology	GO:0050772	1	11	0.213681	0.399689	PLXND1	http://amigo.geneontology.org/amigo/term/GO:0050772
neuromuscular junction development	Gene Ontology	GO:0007528	1	11	0.213681	0.399689	PPFIBP2	http://amigo.geneontology.org/amigo/term/GO:0007528
collagen fibril organization	Gene Ontology	GO:0030199	1	11	0.213681	0.399689	COL13A1	http://amigo.geneontology.org/amigo/term/GO:0030199
cell-cell adhesion	Gene Ontology	GO:0098609	2	42	0.216955	0.402604	LIMS2|COL13A1	http://amigo.geneontology.org/amigo/term/GO:0098609
transmembrane receptor protein tyrosine kinase signaling pathway	Gene Ontology	GO:0007169	3	78	0.217068	0.402604	MUSK|FES|NTRK3	http://amigo.geneontology.org/amigo/term/GO:0007169
axon	Gene Ontology	GO:0030424	3	79	0.222264	0.40973	ROBO1|ADGRL1|NTRK3	http://amigo.geneontology.org/amigo/term/GO:0030424
intracellular membrane-bounded organelle	Gene Ontology	GO:0043231	5	158	0.223377	0.40973	AP3S2|PPT1|ABCA13|HIP1|GPRC5B	http://amigo.geneontology.org/amigo/term/GO:0043231
intracellular signal transduction	Gene Ontology	GO:0035556	4	119	0.228031	0.40973	LAT|LATS1|MKNK1|SH2B1	http://amigo.geneontology.org/amigo/term/GO:0035556
cytoskeleton-dependent intracellular transport	Gene Ontology	GO:0030705	1	12	0.22928	0.40973	HOOK2	http://amigo.geneontology.org/amigo/term/GO:0030705
negative regulation of Wnt signaling pathway	Gene Ontology	GO:0030178	1	12	0.22928	0.40973	TRABD2B	http://amigo.geneontology.org/amigo/term/GO:0030178
calmodulin-dependent protein kinase activity	Gene Ontology	GO:0004683	1	12	0.22928	0.40973	MKNK1	http://amigo.geneontology.org/amigo/term/GO:0004683
AMPA glutamate receptor complex	Gene Ontology	GO:0032281	1	12	0.22928	0.40973	VWC2	http://amigo.geneontology.org/amigo/term/GO:0032281
iron-sulfur cluster assembly	Gene Ontology	GO:0016226	1	12	0.22928	0.40973	MMS19	http://amigo.geneontology.org/amigo/term/GO:0016226
non-canonical Wnt signaling pathway	Gene Ontology	GO:0035567	1	12	0.22928	0.40973	FZD8	http://amigo.geneontology.org/amigo/term/GO:0035567
transferase activity, transferring acyl groups	Gene Ontology	GO:0016746	1	12	0.22928	0.40973	MBOAT2	http://amigo.geneontology.org/amigo/term/GO:0016746
lipid transporter activity	Gene Ontology	GO:0005319	1	12	0.22928	0.40973	ABCA13	http://amigo.geneontology.org/amigo/term/GO:0005319
tRNA methylation	Gene Ontology	GO:0030488	1	12	0.22928	0.40973	TARBP1	http://amigo.geneontology.org/amigo/term/GO:0030488
PDZ domain binding	Gene Ontology	GO:0030165	1	12	0.22928	0.40973	KIDINS220	http://amigo.geneontology.org/amigo/term/GO:0030165
sphingolipid biosynthetic process	Gene Ontology	GO:0030148	1	12	0.22928	0.40973	SGMS1	http://amigo.geneontology.org/amigo/term/GO:0030148
ATP-dependent chromatin remodeling	Gene Ontology	GO:0043044	1	12	0.22928	0.40973	ACTR5	http://amigo.geneontology.org/amigo/term/GO:0043044
stress-activated protein kinase signaling cascade	Gene Ontology	GO:0031098	1	12	0.22928	0.40973	TAOK2	http://amigo.geneontology.org/amigo/term/GO:0031098
ubiquitin-protein transferase activity	Gene Ontology	GO:0004842	2	44	0.231607	0.40973	NSMCE1|RNF146	http://amigo.geneontology.org/amigo/term/GO:0004842
positive regulation of ERK1 and ERK2 cascade	Gene Ontology	GO:0070374	2	44	0.231607	0.40973	ALKAL2|NTRK3	http://amigo.geneontology.org/amigo/term/GO:0070374
focal adhesion	Gene Ontology	GO:0005925	2	44	0.231607	0.40973	PARVB|LIMS2	http://amigo.geneontology.org/amigo/term/GO:0005925
transcription regulatory region sequence-specific DNA binding	Gene Ontology	GO:0000976	3	81	0.232729	0.410069	ARID4B|ARID5B|KLF1	http://amigo.geneontology.org/amigo/term/GO:0000976
cell adhesion	Gene Ontology	GO:0007155	3	81	0.232729	0.410069	PARD3|CLDN4|FES	http://amigo.geneontology.org/amigo/term/GO:0007155
cell migration	Gene Ontology	GO:0016477	3	82	0.237995	0.412771	CORO1A|PIK3C2G|USH2A	http://amigo.geneontology.org/amigo/term/GO:0016477
transmembrane receptor protein tyrosine kinase activity	Gene Ontology	GO:0004714	2	45	0.238956	0.412771	MUSK|NTRK3	http://amigo.geneontology.org/amigo/term/GO:0004714
regulation of RNA splicing	Gene Ontology	GO:0043484	1	13	0.24457	0.412771	HNRNPH3	http://amigo.geneontology.org/amigo/term/GO:0043484
nuclear localization sequence binding	Gene Ontology	GO:0008139	1	13	0.24457	0.412771	TNPO2	http://amigo.geneontology.org/amigo/term/GO:0008139
steroid metabolic process	Gene Ontology	GO:0008202	1	13	0.24457	0.412771	CYP17A1	http://amigo.geneontology.org/amigo/term/GO:0008202
dendrite self-avoidance	Gene Ontology	GO:0070593	1	13	0.24457	0.412771	ROBO1	http://amigo.geneontology.org/amigo/term/GO:0070593
mitochondrial membrane	Gene Ontology	GO:0031966	1	13	0.24457	0.412771	SDHB	http://amigo.geneontology.org/amigo/term/GO:0031966
regulation of GTPase activity	Gene Ontology	GO:0043087	1	13	0.24457	0.412771	PLXND1	http://amigo.geneontology.org/amigo/term/GO:0043087
protein K48-linked ubiquitination	Gene Ontology	GO:0070936	1	13	0.24457	0.412771	UBE2D1	http://amigo.geneontology.org/amigo/term/GO:0070936
clathrin-coated vesicle	Gene Ontology	GO:0030136	1	13	0.24457	0.412771	HIP1	http://amigo.geneontology.org/amigo/term/GO:0030136
zinc ion transmembrane transporter activity	Gene Ontology	GO:0005385	1	13	0.24457	0.412771	SLC39A11	http://amigo.geneontology.org/amigo/term/GO:0005385
negative regulation of BMP signaling pathway	Gene Ontology	GO:0030514	1	13	0.24457	0.412771	VWC2	http://amigo.geneontology.org/amigo/term/GO:0030514
cilium movement	Gene Ontology	GO:0003341	1	13	0.24457	0.412771	DNHD1	http://amigo.geneontology.org/amigo/term/GO:0003341
protein import into mitochondrial matrix	Gene Ontology	GO:0030150	1	13	0.24457	0.412771	TOMM20	http://amigo.geneontology.org/amigo/term/GO:0030150
signal transduction by protein phosphorylation	Gene Ontology	GO:0023014	1	13	0.24457	0.412771	TAOK2	http://amigo.geneontology.org/amigo/term/GO:0023014
receptor tyrosine kinase binding	Gene Ontology	GO:0030971	1	13	0.24457	0.412771	ALKAL2	http://amigo.geneontology.org/amigo/term/GO:0030971
ribosome binding	Gene Ontology	GO:0043022	1	13	0.24457	0.412771	EFL1	http://amigo.geneontology.org/amigo/term/GO:0043022
U12-type spliceosomal complex	Gene Ontology	GO:0005689	1	13	0.24457	0.412771	SNRPD3	http://amigo.geneontology.org/amigo/term/GO:0005689
positive regulation of kinase activity	Gene Ontology	GO:0033674	2	46	0.246317	0.414924	MUSK|NTRK3	http://amigo.geneontology.org/amigo/term/GO:0033674
ATPase activity	Gene Ontology	GO:0016887	3	84	0.248585	0.417945	KATNA1|ATP2A1|KIF22	http://amigo.geneontology.org/amigo/term/GO:0016887
SNARE binding	Gene Ontology	GO:0000149	2	47	0.253685	0.42268	STX10|SYT17	http://amigo.geneontology.org/amigo/term/GO:0000149
sequence-specific DNA binding	Gene Ontology	GO:0043565	4	126	0.258056	0.42268	ZNF70|ZNF80|MYRFL|ZNF768	http://amigo.geneontology.org/amigo/term/GO:0043565
negative regulation of cell migration	Gene Ontology	GO:0030336	1	14	0.259557	0.42268	SRGAP3	http://amigo.geneontology.org/amigo/term/GO:0030336
regulation of calcium ion-dependent exocytosis	Gene Ontology	GO:0017158	1	14	0.259557	0.42268	SYT17	http://amigo.geneontology.org/amigo/term/GO:0017158
response to lipopolysaccharide	Gene Ontology	GO:0032496	1	14	0.259557	0.42268	PALM3	http://amigo.geneontology.org/amigo/term/GO:0032496
cell-cell adhesion mediator activity	Gene Ontology	GO:0098632	1	14	0.259557	0.42268	ROBO1	http://amigo.geneontology.org/amigo/term/GO:0098632
telomere maintenance	Gene Ontology	GO:0000723	1	14	0.259557	0.42268	BLM	http://amigo.geneontology.org/amigo/term/GO:0000723
skeletal system development	Gene Ontology	GO:0001501	1	14	0.259557	0.42268	COL13A1	http://amigo.geneontology.org/amigo/term/GO:0001501
multivesicular body	Gene Ontology	GO:0005771	1	14	0.259557	0.42268	SFTPA1	http://amigo.geneontology.org/amigo/term/GO:0005771
cell projection assembly	Gene Ontology	GO:0030031	1	14	0.259557	0.42268	PARVB	http://amigo.geneontology.org/amigo/term/GO:0030031
DNA-dependent ATPase activity	Gene Ontology	GO:0008094	1	14	0.259557	0.42268	ERCC6	http://amigo.geneontology.org/amigo/term/GO:0008094
vesicle docking	Gene Ontology	GO:0048278	1	14	0.259557	0.42268	STX10	http://amigo.geneontology.org/amigo/term/GO:0048278
neuropeptide hormone activity	Gene Ontology	GO:0005184	1	14	0.259557	0.42268	NMB	http://amigo.geneontology.org/amigo/term/GO:0005184
nervous system development	Gene Ontology	GO:0007399	2	48	0.261059	0.424341	PPT1|NTRK3	http://amigo.geneontology.org/amigo/term/GO:0007399
adherens junction	Gene Ontology	GO:0005912	2	49	0.268433	0.430613	FRMD4B|PARD3	http://amigo.geneontology.org/amigo/term/GO:0005912
negative regulation of transcription by RNA polymerase II	Gene Ontology	GO:0000122	6	214	0.272298	0.430613	HEYL|DNAJB1|TBX3|TBX5|HES1|MDM2	http://amigo.geneontology.org/amigo/term/GO:0000122
U4/U6 x U5 tri-snRNP complex	Gene Ontology	GO:0046540	1	15	0.274247	0.430613	LSM3	http://amigo.geneontology.org/amigo/term/GO:0046540
gap junction channel activity	Gene Ontology	GO:0005243	1	15	0.274247	0.430613	GJA9	http://amigo.geneontology.org/amigo/term/GO:0005243
spindle	Gene Ontology	GO:0005819	1	15	0.274247	0.430613	SPICE1	http://amigo.geneontology.org/amigo/term/GO:0005819
activation of MAPK activity	Gene Ontology	GO:0000187	1	15	0.274247	0.430613	PROK2	http://amigo.geneontology.org/amigo/term/GO:0000187
glutamatergic synapse	Gene Ontology	GO:0098978	1	15	0.274247	0.430613	ARHGAP22	http://amigo.geneontology.org/amigo/term/GO:0098978
connexin complex	Gene Ontology	GO:0005922	1	15	0.274247	0.430613	GJA9	http://amigo.geneontology.org/amigo/term/GO:0005922
phosphatidylinositol 3-kinase complex	Gene Ontology	GO:0005942	1	15	0.274247	0.430613	PIK3C2G	http://amigo.geneontology.org/amigo/term/GO:0005942
positive regulation of autophagy	Gene Ontology	GO:0010508	1	15	0.274247	0.430613	TMEM59	http://amigo.geneontology.org/amigo/term/GO:0010508
U1 snRNP	Gene Ontology	GO:0005685	1	15	0.274247	0.430613	SNRPD3	http://amigo.geneontology.org/amigo/term/GO:0005685
tricarboxylic acid cycle	Gene Ontology	GO:0006099	1	15	0.274247	0.430613	OGDHL	http://amigo.geneontology.org/amigo/term/GO:0006099
structural constituent of nuclear pore	Gene Ontology	GO:0017056	1	15	0.274247	0.430613	NDC1	http://amigo.geneontology.org/amigo/term/GO:0017056
arachidonic acid metabolic process	Gene Ontology	GO:0019369	1	15	0.274247	0.430613	ALOX5	http://amigo.geneontology.org/amigo/term/GO:0019369
positive regulation of cytosolic calcium ion concentration involved in phospholipase C-activating G protein-coupled signaling pathway	Gene Ontology	GO:0051482	1	15	0.274247	0.430613	DRD3	http://amigo.geneontology.org/amigo/term/GO:0051482
chaperone cofactor-dependent protein refolding	Gene Ontology	GO:0051085	1	15	0.274247	0.430613	DNAJB1	http://amigo.geneontology.org/amigo/term/GO:0051085
mRNA export from nucleus	Gene Ontology	GO:0006406	1	15	0.274247	0.430613	DDX39A	http://amigo.geneontology.org/amigo/term/GO:0006406
innate immune response	Gene Ontology	GO:0045087	3	89	0.275341	0.430613	BPI|LBP|FES	http://amigo.geneontology.org/amigo/term/GO:0045087
animal organ morphogenesis	Gene Ontology	GO:0009887	2	51	0.283175	0.436937	LAMA2|USH2A	http://amigo.geneontology.org/amigo/term/GO:0009887
extracellular region	Gene Ontology	GO:0005576	2	51	0.283175	0.436937	EVA1C|PROK2	http://amigo.geneontology.org/amigo/term/GO:0005576
receptor complex	Gene Ontology	GO:0043235	3	91	0.286128	0.436937	MUSK|GPRC5B|NTRK3	http://amigo.geneontology.org/amigo/term/GO:0043235
cyclin-dependent protein serine/threonine kinase activity	Gene Ontology	GO:0004693	1	16	0.288646	0.436937	CDK1	http://amigo.geneontology.org/amigo/term/GO:0004693
receptor-mediated endocytosis	Gene Ontology	GO:0006898	1	16	0.288646	0.436937	PPT1	http://amigo.geneontology.org/amigo/term/GO:0006898
RNA polymerase III complex	Gene Ontology	GO:0005666	1	16	0.288646	0.436937	POLR3E	http://amigo.geneontology.org/amigo/term/GO:0005666
chromatin DNA binding	Gene Ontology	GO:0031490	1	16	0.288646	0.436937	PPARGC1A	http://amigo.geneontology.org/amigo/term/GO:0031490
peroxisomal membrane	Gene Ontology	GO:0005778	1	16	0.288646	0.436937	PEX11A	http://amigo.geneontology.org/amigo/term/GO:0005778
nuclear receptor transcription coactivator activity	Gene Ontology	GO:0030374	1	16	0.288646	0.436937	PPARGC1A	http://amigo.geneontology.org/amigo/term/GO:0030374
peroxidase activity	Gene Ontology	GO:0004601	1	16	0.288646	0.436937	PXDN	http://amigo.geneontology.org/amigo/term/GO:0004601
-	Gene Ontology	GO:0010498	1	16	0.288646	0.436937	PSMB1	http://amigo.geneontology.org/amigo/term/GO:0010498
G-protein beta/gamma-subunit complex binding	Gene Ontology	GO:0031683	1	16	0.288646	0.436937	GNAZ	http://amigo.geneontology.org/amigo/term/GO:0031683
proteasome core complex	Gene Ontology	GO:0005839	1	16	0.288646	0.436937	PSMB1	http://amigo.geneontology.org/amigo/term/GO:0005839
Rho protein signal transduction	Gene Ontology	GO:0007266	1	16	0.288646	0.436937	CDC42EP4	http://amigo.geneontology.org/amigo/term/GO:0007266
postsynapse	Gene Ontology	GO:0098794	1	16	0.288646	0.436937	ADGRB3	http://amigo.geneontology.org/amigo/term/GO:0098794
transcription coactivator activity	Gene Ontology	GO:0003713	2	52	0.290537	0.437544	TADA2B|PPARGC1A	http://amigo.geneontology.org/amigo/term/GO:0003713
DNA-binding transcription repressor activity, RNA polymerase II-specific	Gene Ontology	GO:0001227	2	52	0.290537	0.437544	HES1|HEYL	http://amigo.geneontology.org/amigo/term/GO:0001227
inflammatory response	Gene Ontology	GO:0006954	3	93	0.296947	0.438704	LAT|TLR1|PTGER1	http://amigo.geneontology.org/amigo/term/GO:0006954
microtubule-based movement	Gene Ontology	GO:0007018	2	53	0.297889	0.438704	DNHD1|KIF22	http://amigo.geneontology.org/amigo/term/GO:0007018
integral component of mitochondrial inner membrane	Gene Ontology	GO:0031305	1	17	0.30276	0.438704	MPC1	http://amigo.geneontology.org/amigo/term/GO:0031305
chaperone binding	Gene Ontology	GO:0051087	1	17	0.30276	0.438704	DNAJB1	http://amigo.geneontology.org/amigo/term/GO:0051087
spliceosomal complex	Gene Ontology	GO:0005681	1	17	0.30276	0.438704	DHX15	http://amigo.geneontology.org/amigo/term/GO:0005681
cytoplasmic translation	Gene Ontology	GO:0002181	1	17	0.30276	0.438704	EIF4H	http://amigo.geneontology.org/amigo/term/GO:0002181
negative chemotaxis	Gene Ontology	GO:0050919	1	17	0.30276	0.438704	SLIT1	http://amigo.geneontology.org/amigo/term/GO:0050919
histone acetyltransferase complex	Gene Ontology	GO:0000123	1	17	0.30276	0.438704	PHF10	http://amigo.geneontology.org/amigo/term/GO:0000123
neuron projection morphogenesis	Gene Ontology	GO:0048812	1	17	0.30276	0.438704	TAOK2	http://amigo.geneontology.org/amigo/term/GO:0048812
positive regulation of phosphatidylinositol 3-kinase signaling	Gene Ontology	GO:0014068	1	17	0.30276	0.438704	NTRK3	http://amigo.geneontology.org/amigo/term/GO:0014068
histone acetyltransferase activity	Gene Ontology	GO:0004402	1	17	0.30276	0.438704	PHF10	http://amigo.geneontology.org/amigo/term/GO:0004402
proteasomal ubiquitin-independent protein catabolic process	Gene Ontology	GO:0010499	1	17	0.30276	0.438704	PSMB1	http://amigo.geneontology.org/amigo/term/GO:0010499
muscle contraction	Gene Ontology	GO:0006936	1	17	0.30276	0.438704	LMOD3	http://amigo.geneontology.org/amigo/term/GO:0006936
activation of protein kinase activity	Gene Ontology	GO:0032147	1	17	0.30276	0.438704	TAOK2	http://amigo.geneontology.org/amigo/term/GO:0032147
phosphatidylinositol-3-phosphate binding	Gene Ontology	GO:0032266	1	17	0.30276	0.438704	PLEKHA5	http://amigo.geneontology.org/amigo/term/GO:0032266
oxidoreductase activity, acting on the CH-OH group of donors, NAD or NADP as acceptor	Gene Ontology	GO:0016616	1	17	0.30276	0.438704	SDR42E2	http://amigo.geneontology.org/amigo/term/GO:0016616
mitotic spindle assembly	Gene Ontology	GO:0090307	1	17	0.30276	0.438704	SPICE1	http://amigo.geneontology.org/amigo/term/GO:0090307
oxidoreductase activity	Gene Ontology	GO:0016491	2	54	0.30523	0.441555	SDR42E2|CYB5RL	http://amigo.geneontology.org/amigo/term/GO:0016491
protein phosphatase regulator activity	Gene Ontology	GO:0019888	1	18	0.316595	0.452792	PPP1R16B	http://amigo.geneontology.org/amigo/term/GO:0019888
calcium ion transmembrane transport	Gene Ontology	GO:0070588	1	18	0.316595	0.452792	ATP2A1	http://amigo.geneontology.org/amigo/term/GO:0070588
peptidyl-tyrosine dephosphorylation	Gene Ontology	GO:0035335	1	18	0.316595	0.452792	PTPN18	http://amigo.geneontology.org/amigo/term/GO:0035335
retrograde vesicle-mediated transport, Golgi to endoplasmic reticulum	Gene Ontology	GO:0006890	1	18	0.316595	0.452792	COG7	http://amigo.geneontology.org/amigo/term/GO:0006890
repressing transcription factor binding	Gene Ontology	GO:0070491	1	18	0.316595	0.452792	ESRRG	http://amigo.geneontology.org/amigo/term/GO:0070491
amino acid transmembrane transport	Gene Ontology	GO:0003333	1	19	0.330155	0.462427	SLC7A13	http://amigo.geneontology.org/amigo/term/GO:0003333
cell-matrix adhesion	Gene Ontology	GO:0007160	1	19	0.330155	0.462427	COL13A1	http://amigo.geneontology.org/amigo/term/GO:0007160
regulation of intracellular pH	Gene Ontology	GO:0051453	1	19	0.330155	0.462427	CLN3	http://amigo.geneontology.org/amigo/term/GO:0051453
fatty acid beta-oxidation	Gene Ontology	GO:0006635	1	19	0.330155	0.462427	ECHDC2	http://amigo.geneontology.org/amigo/term/GO:0006635
late endosome	Gene Ontology	GO:0005770	1	19	0.330155	0.462427	TMEM59	http://amigo.geneontology.org/amigo/term/GO:0005770
cytoplasmic microtubule	Gene Ontology	GO:0005881	1	19	0.330155	0.462427	REEP3	http://amigo.geneontology.org/amigo/term/GO:0005881
peptidyl-prolyl cis-trans isomerase activity	Gene Ontology	GO:0003755	1	19	0.330155	0.462427	FKBP6	http://amigo.geneontology.org/amigo/term/GO:0003755
preribosome, large subunit precursor	Gene Ontology	GO:0030687	1	19	0.330155	0.462427	FBXW9	http://amigo.geneontology.org/amigo/term/GO:0030687
cytoskeleton	Gene Ontology	GO:0005856	2	59	0.341668	0.473516	LMOD3|CDC42EP4	http://amigo.geneontology.org/amigo/term/GO:0005856
neuron differentiation	Gene Ontology	GO:0030182	2	59	0.341668	0.473516	OLIG2|LHX5	http://amigo.geneontology.org/amigo/term/GO:0030182
lipid droplet	Gene Ontology	GO:0005811	1	20	0.343447	0.473516	ADIG	http://amigo.geneontology.org/amigo/term/GO:0005811
double-strand break repair	Gene Ontology	GO:0006302	1	20	0.343447	0.473516	ACTR5	http://amigo.geneontology.org/amigo/term/GO:0006302
endosomal transport	Gene Ontology	GO:0016197	1	20	0.343447	0.473516	ITSN1	http://amigo.geneontology.org/amigo/term/GO:0016197
activation of cysteine-type endopeptidase activity involved in apoptotic process	Gene Ontology	GO:0006919	1	20	0.343447	0.473516	HIP1	http://amigo.geneontology.org/amigo/term/GO:0006919
chromatin binding	Gene Ontology	GO:0003682	3	102	0.345786	0.475254	TADA2B|TFAM|L3MBTL3	http://amigo.geneontology.org/amigo/term/GO:0003682
ubiquitin-dependent protein catabolic process	Gene Ontology	GO:0006511	3	103	0.351206	0.480455	KLHL25|UBE2D1|RNF146	http://amigo.geneontology.org/amigo/term/GO:0006511
transcription factor binding	Gene Ontology	GO:0008134	2	61	0.356082	0.481138	TFAM|PPARGC1A	http://amigo.geneontology.org/amigo/term/GO:0008134
signaling receptor activity	Gene Ontology	GO:0038023	2	61	0.356082	0.481138	TLR1|RTBDN	http://amigo.geneontology.org/amigo/term/GO:0038023
bicellular tight junction assembly	Gene Ontology	GO:0070830	1	21	0.356475	0.481138	CLDN4	http://amigo.geneontology.org/amigo/term/GO:0070830
chemotaxis	Gene Ontology	GO:0006935	1	21	0.356475	0.481138	FES	http://amigo.geneontology.org/amigo/term/GO:0006935
cellular response to calcium ion	Gene Ontology	GO:0071277	1	21	0.356475	0.481138	SYT17	http://amigo.geneontology.org/amigo/term/GO:0071277
exocytic vesicle	Gene Ontology	GO:0070382	1	21	0.356475	0.481138	SYT17	http://amigo.geneontology.org/amigo/term/GO:0070382
calcium-dependent protein binding	Gene Ontology	GO:0048306	1	21	0.356475	0.481138	S100P	http://amigo.geneontology.org/amigo/term/GO:0048306
intracellular protein transport	Gene Ontology	GO:0006886	3	105	0.36203	0.486201	STX10|USP6NL|TBC1D16	http://amigo.geneontology.org/amigo/term/GO:0006886
synapse	Gene Ontology	GO:0045202	3	105	0.36203	0.486201	SDK2|MYPN|RIMS3	http://amigo.geneontology.org/amigo/term/GO:0045202
multicellular organism development	Gene Ontology	GO:0007275	2	62	0.363246	0.487093	MUSK|NTRK3	http://amigo.geneontology.org/amigo/term/GO:0007275
regulation of transcription, DNA-templated	Gene Ontology	GO:0006355	3	106	0.367431	0.490684	ACTR5|TFAM|THAP7	http://amigo.geneontology.org/amigo/term/GO:0006355
tRNA binding	Gene Ontology	GO:0000049	1	22	0.369246	0.490684	SEPSECS	http://amigo.geneontology.org/amigo/term/GO:0000049
positive regulation of MAPK cascade	Gene Ontology	GO:0043410	1	22	0.369246	0.490684	NTRK3	http://amigo.geneontology.org/amigo/term/GO:0043410
positive regulation of transcription, DNA-templated	Gene Ontology	GO:0045893	2	63	0.37038	0.490684	MYRFL|PPARGC1A	http://amigo.geneontology.org/amigo/term/GO:0045893
microtubule binding	Gene Ontology	GO:0008017	3	108	0.378209	0.49901	HOOK2|REEP3|KIF22	http://amigo.geneontology.org/amigo/term/GO:0008017
kinetochore	Gene Ontology	GO:0000776	1	23	0.381763	0.49901	MTBP	http://amigo.geneontology.org/amigo/term/GO:0000776
non-membrane spanning protein tyrosine kinase activity	Gene Ontology	GO:0004715	1	23	0.381763	0.49901	FES	http://amigo.geneontology.org/amigo/term/GO:0004715
establishment or maintenance of cell polarity	Gene Ontology	GO:0007163	1	23	0.381763	0.49901	PARVB	http://amigo.geneontology.org/amigo/term/GO:0007163
peptidyl-tyrosine autophosphorylation	Gene Ontology	GO:0038083	1	23	0.381763	0.49901	FES	http://amigo.geneontology.org/amigo/term/GO:0038083
histone binding	Gene Ontology	GO:0042393	2	66	0.391585	0.507518	L3MBTL3|PHF10	http://amigo.geneontology.org/amigo/term/GO:0042393
small-subunit processome	Gene Ontology	GO:0032040	1	24	0.394032	0.507518	IMP4	http://amigo.geneontology.org/amigo/term/GO:0032040
cell-cell signaling	Gene Ontology	GO:0007267	1	24	0.394032	0.507518	GJA9	http://amigo.geneontology.org/amigo/term/GO:0007267
spindle pole	Gene Ontology	GO:0000922	1	24	0.394032	0.507518	LATS1	http://amigo.geneontology.org/amigo/term/GO:0000922
phosphatidylserine binding	Gene Ontology	GO:0001786	1	24	0.394032	0.507518	SYT17	http://amigo.geneontology.org/amigo/term/GO:0001786
lamellipodium	Gene Ontology	GO:0030027	1	24	0.394032	0.507518	PARVB	http://amigo.geneontology.org/amigo/term/GO:0030027
DNA-binding transcription factor activity, RNA polymerase II-specific	Gene Ontology	GO:0000981	7	297	0.398284	0.511499	GLIS1|TAL1|LHX5|ZNF80|KLF1|LYL1|OLIG2	http://amigo.geneontology.org/amigo/term/GO:0000981
mRNA 3'-UTR binding	Gene Ontology	GO:0003730	1	25	0.406058	0.51846	PABPC4	http://amigo.geneontology.org/amigo/term/GO:0003730
SNAP receptor activity	Gene Ontology	GO:0005484	1	25	0.406058	0.51846	STX10	http://amigo.geneontology.org/amigo/term/GO:0005484
spermatogenesis	Gene Ontology	GO:0007283	1	25	0.406058	0.51846	FKBP6	http://amigo.geneontology.org/amigo/term/GO:0007283
ubiquitin binding	Gene Ontology	GO:0043130	1	26	0.417846	0.529284	MDM2	http://amigo.geneontology.org/amigo/term/GO:0043130
chromatin	Gene Ontology	GO:0000785	1	26	0.417846	0.529284	PDS5A	http://amigo.geneontology.org/amigo/term/GO:0000785
syntaxin binding	Gene Ontology	GO:0019905	1	26	0.417846	0.529284	SYT17	http://amigo.geneontology.org/amigo/term/GO:0019905
centrosome	Gene Ontology	GO:0005813	3	116	0.420864	0.530445	HOOK2|SPICE1|STIL	http://amigo.geneontology.org/amigo/term/GO:0005813
negative regulation of cell population proliferation	Gene Ontology	GO:0008285	1	27	0.429401	0.536598	NUPR1	http://amigo.geneontology.org/amigo/term/GO:0008285
translation initiation factor activity	Gene Ontology	GO:0003743	1	27	0.429401	0.536598	EIF4E3	http://amigo.geneontology.org/amigo/term/GO:0003743
microtubule cytoskeleton	Gene Ontology	GO:0015630	1	27	0.429401	0.536598	ARL3	http://amigo.geneontology.org/amigo/term/GO:0015630
vesicle fusion	Gene Ontology	GO:0006906	1	27	0.429401	0.536598	STX10	http://amigo.geneontology.org/amigo/term/GO:0006906
positive regulation of cell population proliferation	Gene Ontology	GO:0008284	2	73	0.43973	0.543066	TBX3|PROK2	http://amigo.geneontology.org/amigo/term/GO:0008284
cytosolic small ribosomal subunit	Gene Ontology	GO:0022627	1	28	0.440726	0.543066	RPS15A	http://amigo.geneontology.org/amigo/term/GO:0022627
molecular adaptor activity	Gene Ontology	GO:0060090	1	28	0.440726	0.543066	ITSN1	http://amigo.geneontology.org/amigo/term/GO:0060090
immune response	Gene Ontology	GO:0006955	2	74	0.446439	0.54932	LAT|VPREB3	http://amigo.geneontology.org/amigo/term/GO:0006955
protein import into nucleus	Gene Ontology	GO:0006606	1	29	0.451827	0.551329	TNPO2	http://amigo.geneontology.org/amigo/term/GO:0006606
mitochondrial inner membrane	Gene Ontology	GO:0005743	1	29	0.451827	0.551329	COQ7	http://amigo.geneontology.org/amigo/term/GO:0005743
secretory granule	Gene Ontology	GO:0030141	1	29	0.451827	0.551329	SRGN	http://amigo.geneontology.org/amigo/term/GO:0030141
mitochondrial large ribosomal subunit	Gene Ontology	GO:0005762	1	29	0.451827	0.551329	MRPL46	http://amigo.geneontology.org/amigo/term/GO:0005762
cytokine activity	Gene Ontology	GO:0005125	2	76	0.45972	0.556133	GDF2|GDF10	http://amigo.geneontology.org/amigo/term/GO:0005125
endopeptidase activity	Gene Ontology	GO:0004175	1	30	0.462708	0.556133	PSMB1	http://amigo.geneontology.org/amigo/term/GO:0004175
ATPase-coupled transmembrane transporter activity	Gene Ontology	GO:0042626	1	30	0.462708	0.556133	ABCA13	http://amigo.geneontology.org/amigo/term/GO:0042626
regulation of cell migration	Gene Ontology	GO:0030334	1	30	0.462708	0.556133	PLXND1	http://amigo.geneontology.org/amigo/term/GO:0030334
protein polyubiquitination	Gene Ontology	GO:0000209	2	78	0.472813	0.561295	SHPRH|UBE2D1	http://amigo.geneontology.org/amigo/term/GO:0000209
peptide binding	Gene Ontology	GO:0042277	1	31	0.473373	0.561295	OXTR	http://amigo.geneontology.org/amigo/term/GO:0042277
nuclear receptor activity	Gene Ontology	GO:0004879	1	31	0.473373	0.561295	NR2C2	http://amigo.geneontology.org/amigo/term/GO:0004879
ubiquitin conjugating enzyme activity	Gene Ontology	GO:0061631	1	31	0.473373	0.561295	UBE2D1	http://amigo.geneontology.org/amigo/term/GO:0061631
cellular response to DNA damage stimulus	Gene Ontology	GO:0006974	1	31	0.473373	0.561295	SHPRH	http://amigo.geneontology.org/amigo/term/GO:0006974
protein glycosylation	Gene Ontology	GO:0006486	1	31	0.473373	0.561295	ST8SIA2	http://amigo.geneontology.org/amigo/term/GO:0006486
transport	Gene Ontology	GO:0006810	1	31	0.473373	0.561295	SLC6A6	http://amigo.geneontology.org/amigo/term/GO:0006810
sodium ion transmembrane transport	Gene Ontology	GO:0035725	1	31	0.473373	0.561295	SLC6A6	http://amigo.geneontology.org/amigo/term/GO:0035725
ubiquitin ligase complex	Gene Ontology	GO:0000151	1	32	0.483827	0.57215	UBE2D1	http://amigo.geneontology.org/amigo/term/GO:0000151
single-stranded DNA binding	Gene Ontology	GO:0003697	1	33	0.494074	0.577293	STN1	http://amigo.geneontology.org/amigo/term/GO:0003697
SNARE complex	Gene Ontology	GO:0031201	1	33	0.494074	0.577293	STX10	http://amigo.geneontology.org/amigo/term/GO:0031201
nuclear envelope	Gene Ontology	GO:0005635	1	33	0.494074	0.577293	ALOX5	http://amigo.geneontology.org/amigo/term/GO:0005635
exocytosis	Gene Ontology	GO:0006887	1	34	0.504118	0.582081	RAB3IP	http://amigo.geneontology.org/amigo/term/GO:0006887
positive regulation of cell migration	Gene Ontology	GO:0030335	1	34	0.504118	0.582081	FAM110C	http://amigo.geneontology.org/amigo/term/GO:0030335
angiogenesis	Gene Ontology	GO:0001525	1	34	0.504118	0.582081	COL24A1	http://amigo.geneontology.org/amigo/term/GO:0001525
dendritic spine	Gene Ontology	GO:0043197	1	34	0.504118	0.582081	ARHGAP44	http://amigo.geneontology.org/amigo/term/GO:0043197
microtubule motor activity	Gene Ontology	GO:0003777	1	34	0.504118	0.582081	KIF22	http://amigo.geneontology.org/amigo/term/GO:0003777
cell surface receptor signaling pathway	Gene Ontology	GO:0007166	1	34	0.504118	0.582081	ADGRA3	http://amigo.geneontology.org/amigo/term/GO:0007166
kinesin complex	Gene Ontology	GO:0005871	1	34	0.504118	0.582081	KIF22	http://amigo.geneontology.org/amigo/term/GO:0005871
structural constituent of ribosome	Gene Ontology	GO:0003735	2	84	0.510915	0.589157	MRPL46|RPS15A	http://amigo.geneontology.org/amigo/term/GO:0003735
P-body	Gene Ontology	GO:0000932	1	35	0.513963	0.590353	LSM3	http://amigo.geneontology.org/amigo/term/GO:0000932
cytosolic large ribosomal subunit	Gene Ontology	GO:0022625	1	35	0.513963	0.590353	RPL32	http://amigo.geneontology.org/amigo/term/GO:0022625
synaptic vesicle	Gene Ontology	GO:0008021	1	36	0.523612	0.597542	STX10	http://amigo.geneontology.org/amigo/term/GO:0008021
central nervous system development	Gene Ontology	GO:0007417	1	36	0.523612	0.597542	TBX3	http://amigo.geneontology.org/amigo/term/GO:0007417
calcium-dependent phospholipid binding	Gene Ontology	GO:0005544	1	36	0.523612	0.597542	SYT17	http://amigo.geneontology.org/amigo/term/GO:0005544
protein folding	Gene Ontology	GO:0006457	1	36	0.523612	0.597542	FKBP6	http://amigo.geneontology.org/amigo/term/GO:0006457
negative regulation of endopeptidase activity	Gene Ontology	GO:0010951	1	37	0.53307	0.606764	TIMP4	http://amigo.geneontology.org/amigo/term/GO:0010951
voltage-gated potassium channel complex	Gene Ontology	GO:0008076	1	38	0.542341	0.612567	KCNAB1	http://amigo.geneontology.org/amigo/term/GO:0008076
ciliary basal body	Gene Ontology	GO:0036064	1	38	0.542341	0.612567	KNCN	http://amigo.geneontology.org/amigo/term/GO:0036064
positive regulation of apoptotic process	Gene Ontology	GO:0043065	1	38	0.542341	0.612567	LATS1	http://amigo.geneontology.org/amigo/term/GO:0043065
Golgi organization	Gene Ontology	GO:0007030	1	38	0.542341	0.612567	COG7	http://amigo.geneontology.org/amigo/term/GO:0007030
calcium ion binding	Gene Ontology	GO:0005509	3	141	0.546153	0.616083	SYT17|S100P|MCTP2	http://amigo.geneontology.org/amigo/term/GO:0005509
protein localization to plasma membrane	Gene Ontology	GO:0072659	1	39	0.551428	0.618077	TSPAN15	http://amigo.geneontology.org/amigo/term/GO:0072659
actin binding	Gene Ontology	GO:0003779	1	39	0.551428	0.618077	PARVB	http://amigo.geneontology.org/amigo/term/GO:0003779
calmodulin binding	Gene Ontology	GO:0005516	1	39	0.551428	0.618077	MKNK1	http://amigo.geneontology.org/amigo/term/GO:0005516
positive regulation of cytosolic calcium ion concentration	Gene Ontology	GO:0007204	1	39	0.551428	0.618077	PTGER1	http://amigo.geneontology.org/amigo/term/GO:0007204
neuron projection	Gene Ontology	GO:0043005	3	144	0.560116	0.626466	SV2B|NMB|NPTX1	http://amigo.geneontology.org/amigo/term/GO:0043005
endocytosis	Gene Ontology	GO:0006897	1	40	0.560335	0.626466	ITSN1	http://amigo.geneontology.org/amigo/term/GO:0006897
ubiquitin protein ligase binding	Gene Ontology	GO:0031625	1	41	0.569065	0.634616	UBE2D1	http://amigo.geneontology.org/amigo/term/GO:0031625
anatomical structure development	Gene Ontology	GO:0048856	1	41	0.569065	0.634616	NR2C2	http://amigo.geneontology.org/amigo/term/GO:0048856
early endosome	Gene Ontology	GO:0005769	1	42	0.577623	0.640557	TBC1D16	http://amigo.geneontology.org/amigo/term/GO:0005769
cell differentiation	Gene Ontology	GO:0030154	4	200	0.578028	0.640557	NR2C2|HES1|HEYL|FES	http://amigo.geneontology.org/amigo/term/GO:0030154
actin filament binding	Gene Ontology	GO:0051015	2	101	0.608601	0.669385	CORO1A|HIP1	http://amigo.geneontology.org/amigo/term/GO:0051015
regulation of cell population proliferation	Gene Ontology	GO:0042127	1	48	0.625519	0.685426	FES	http://amigo.geneontology.org/amigo/term/GO:0042127
transcription coregulator activity	Gene Ontology	GO:0003712	1	49	0.632957	0.689289	PPARGC1A	http://amigo.geneontology.org/amigo/term/GO:0003712
neuronal cell body	Gene Ontology	GO:0043025	1	49	0.632957	0.689289	KNCN	http://amigo.geneontology.org/amigo/term/GO:0043025
cell surface	Gene Ontology	GO:0009986	2	106	0.634357	0.689962	UMOD|GP2	http://amigo.geneontology.org/amigo/term/GO:0009986
mRNA binding	Gene Ontology	GO:0003729	2	107	0.639347	0.692946	ZC3H12D|RBM47	http://amigo.geneontology.org/amigo/term/GO:0003729
Golgi membrane	Gene Ontology	GO:0000139	1	50	0.640247	0.692946	MAN2A2	http://amigo.geneontology.org/amigo/term/GO:0000139
signaling receptor binding	Gene Ontology	GO:0005102	2	108	0.644282	0.696457	FES|PIK3AP1	http://amigo.geneontology.org/amigo/term/GO:0005102
endomembrane system	Gene Ontology	GO:0012505	1	51	0.647393	0.698963	STX10	http://amigo.geneontology.org/amigo/term/GO:0012505
protein ubiquitination	Gene Ontology	GO:0016567	2	110	0.653993	0.703937	EIPR1|MDM2	http://amigo.geneontology.org/amigo/term/GO:0016567
serine-type endopeptidase activity	Gene Ontology	GO:0004252	1	52	0.654397	0.703937	FURIN	http://amigo.geneontology.org/amigo/term/GO:0004252
trans-Golgi network	Gene Ontology	GO:0005802	1	53	0.661263	0.709472	FURIN	http://amigo.geneontology.org/amigo/term/GO:0005802
regulation of membrane potential	Gene Ontology	GO:0042391	1	55	0.674588	0.7214	RIMS3	http://amigo.geneontology.org/amigo/term/GO:0042391
cytoplasmic vesicle	Gene Ontology	GO:0031410	1	57	0.687389	0.732273	DENND4C	http://amigo.geneontology.org/amigo/term/GO:0031410
oxidation-reduction process	Gene Ontology	GO:0055114	1	59	0.699688	0.742681	KCNAB1	http://amigo.geneontology.org/amigo/term/GO:0055114
heme binding	Gene Ontology	GO:0020037	1	61	0.711503	0.75395	CYP17A1	http://amigo.geneontology.org/amigo/term/GO:0020037
microtubule cytoskeleton organization	Gene Ontology	GO:0000226	1	63	0.722855	0.762677	PARD3	http://amigo.geneontology.org/amigo/term/GO:0000226
protein phosphorylation	Gene Ontology	GO:0006468	1	63	0.722855	0.762677	CDK1	http://amigo.geneontology.org/amigo/term/GO:0006468
actin cytoskeleton	Gene Ontology	GO:0015629	1	64	0.728362	0.767568	PARVB	http://amigo.geneontology.org/amigo/term/GO:0015629
Golgi apparatus	Gene Ontology	GO:0005794	3	192	0.745587	0.781049	YIPF1|TMF1|NDST4	http://amigo.geneontology.org/amigo/term/GO:0005794
microtubule	Gene Ontology	GO:0005874	1	68	0.749321	0.784028	KIF22	http://amigo.geneontology.org/amigo/term/GO:0005874
external side of plasma membrane	Gene Ontology	GO:0009897	2	136	0.761667	0.794117	ADGRA3|CD19	http://amigo.geneontology.org/amigo/term/GO:0009897
GTP binding	Gene Ontology	GO:0005525	1	81	0.806913	0.825656	ARL3	http://amigo.geneontology.org/amigo/term/GO:0005525
proteasome-mediated ubiquitin-dependent protein catabolic process	Gene Ontology	GO:0043161	1	82	0.810752	0.828623	PSMB1	http://amigo.geneontology.org/amigo/term/GO:0043161
endoplasmic reticulum	Gene Ontology	GO:0005783	3	225	0.832643	0.849026	TMF1|SGPL1|SMIM14	http://amigo.geneontology.org/amigo/term/GO:0005783
regulation of gene expression	Gene Ontology	GO:0010468	1	102	0.873375	0.883402	COQ7	http://amigo.geneontology.org/amigo/term/GO:0010468
