# Supplementary figures and images for: Assessment and Distribution of Runs of Homozygosity in Horse Breeds Representing Different Utility Types
Source: MDPI journal article supplement (doi:10.3390/ani12233293), 2022-11-25

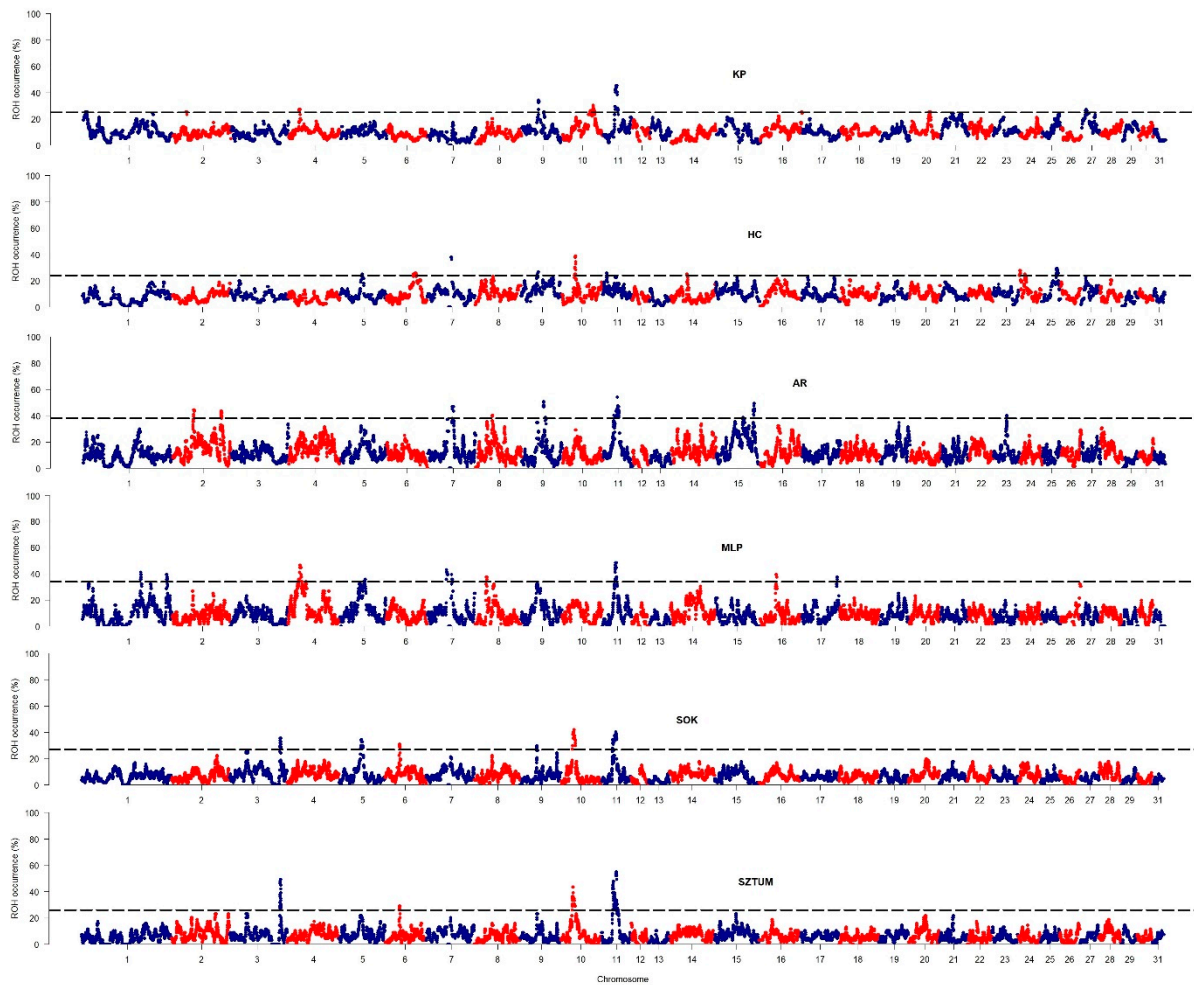

Dashed line represents top 1% of ROH occurrence in analysed breed.

Supplement: s1 [file s1]
